# Supplementary material for: PM-IRRAS and DFT investigation of the surface orientation of new Ir piano-stool complexes attached to Au(111)
Source: Royal Society of Chemistry journal article supplement (doi:10.1039/d2dt02730e), 2022-01-01
Supplement: d2dt02730e1.pdf [file d2dt02730e1.pdf]

## Supporting Information

### PM-IRRAS and DFT investigation of the surface orientation of new Ir piano-stool complexes attached to Au (111)

*Christopher J. Miller, Felix M. Brunner, H. Ray Kelly, Po Ling Cheung, Nicole A. Torquato, Milan Gembicky, Saya Okuno, Thomas Chan, Victor S. Batista, Clifford P. Kubiak\**

Department of Chemistry and Biochemistry, University of California, San Diego, 9500 Gilman Drive, Mail Code 0358, La Jolla, California 92093-0358

Department of Chemistry and Energy Sciences Institute, Yale University, 225 Prospect Street, New Haven, Connecticut 06520, United States

#### Table of Contents

##### Contents

|                                                                              |    |
|------------------------------------------------------------------------------|----|
| Experimental Methods .....                                                   | 2  |
| Simulated isotropic IRRAS spectra.....                                       | 2  |
| Comparison of the PM-IRRAS and the Simulated IRRAS via Spectral Fitting..... | 3  |
| Determination of Surface Coverage by ICP-MS.....                             | 3  |
| Characterization of SAMs by X-ray photoelectron spectroscopy (XPS).....      | 3  |
| NMR Spectra .....                                                            | 4  |
| IR-Spectra .....                                                             | 10 |
| FTIR Spectra of KBr Pellets.....                                             | 15 |
| Molar Absorptivity and Refractive Index .....                                | 16 |
| Mass Spectra .....                                                           | 17 |
| ICP-MS determination of surface coverage.....                                | 21 |
| Parameters for IRRAS Simulation.....                                         | 21 |
| Raw PM-IRRAS .....                                                           | 22 |
| PM-IRRAS and Simulated IRRAS with Fits.....                                  | 23 |
| PM-IRRAS Peak Fitting Analysis .....                                         | 25 |
| Computational Benchmarking .....                                             | 28 |

|                                                                                          |    |
|------------------------------------------------------------------------------------------|----|
| Comparison of the Experimental and DFT calculated TDMs for orientation determination. .. | 28 |
| DFT Computed FTIR.....                                                                   | 29 |
| DFT Optimized Structure Parameters.....                                                  | 31 |
| Relative Intensity and Transition Dipole Analysis with Computed Orientations.....        | 32 |
| TDM analysis using Functional: PBE D3 Basis Set: LANL2DZ .....                           | 32 |
| TDM Analysis using Functional: wB97XD Basis Set: LANL2DZ.....                            | 35 |
| TDM analysis using the wB97XD functional and the DEF2SVP basis set .....                 | 38 |
| Visualizations of select IR modes.....                                                   | 41 |
| Crystallographic Data .....                                                              | 45 |
| X-ray Photoelectron Spectroscopy .....                                                   | 47 |
| C1m.....                                                                                 | 47 |
| C2m.....                                                                                 | 48 |
| Quantification of Cl and Ir for C1m.....                                                 | 49 |
| DFT Optimized xyz coordinates (Functional: wB97XD Basis Set: DEF2SVP).....               | 50 |
| DFT optimized xyz coordinates for C1m Cl down.....                                       | 50 |
| DFT optimized xyz coordinates for C1m Cl up.....                                         | 52 |
| DFT optimized xyz coordinates for C2m Cl down.....                                       | 53 |
| DFT optimized xyz coordinates for C2m Cl up.....                                         | 55 |
| Reported densities of Ir piano-stool complexes.....                                      | 58 |
| References.....                                                                          | 58 |

## Experimental Methods

**Simulated isotropic IRRAS spectra.** The method for the simulation of isotropic IRRA spectra from transmission spectra of C1 and C2 followed previous literature precedent.<sup>1-8</sup> Briefly, the simulation of isotropic IRRA spectra requires the known experimentally determined molar absorptivity, refractive index, and estimated molecular density, surface coverage, and monolayer thickness of the analyte and the refractive index and molar absorptivity of the Au surface. The molar absorptivity is determined from a transmission FTIR spectra of C1 and C2 were obtained on KBr pellets of known concentrations and thickness (Figure SX). The refractive index is determined via the Kramers-Kronig transformation following molar absorptivity determination (Figure SX). The molecular density of C1 and C2 is estimated from the C3 crystal structure. While this is a starting point for the estimation of the density of C1 and C2, calculated spectra were also made using a high (2.0 g/cm<sup>3</sup>) and low (1.2 g/cm<sup>3</sup>) estimation of the density to bracket the determined angle of the transition dipole moments. The high and low estimates were chosen

as 91% of all of Ir piano-stool complexes that contained both a halide and either a 2,2-bipyridine or phenylpyridine moiety in the Cambridge Structural Database had a density between these two values (Figure S45, 78 structures). The surface coverage determined via ICP-MS of the monolayers. The monolayer thickness of C1 and C2 was determined as the average of the distance from the surface and the atom farthest from the surface to the S atom attached to the surface of C1m and C2m monolayers in the C1 up and C1 down orientations in DFT. Spectra was then simulated used methods published elsewhere, using an angle of incidence of the IRRAS as  $88^\circ$  to match the experimental PM-IRRAS.<sup>1,7,8</sup> Overall, due to the estimation of the density, the method has an average tolerance of  $\pm 6^\circ$  (average difference between initial estimation and bracketed high and low values) for the determined angle of the transition dipole moment (TDM).

**Comparison of the PM-IRRAS and the Simulated IRRAS via Spectral Fitting.** The comparison of the PM-IRRAS and simulated isotropic spectra follows previously reported methods.<sup>1,5,7,8</sup> Briefly, spectral fits were performed in OriginPro. Following previous lab precedent, all spectra were smoothed with at 9  $\text{cm}^{-1}$  resolution and fit.<sup>9,10</sup> Second derivative analysis provided by the OMNIC Series software allowed for the resolution of bands. The PM-IRRA spectra were fit with Gaussian line shapes and simulated IRRAS spectra where fit with a mixture of Lorentzian and Gaussian line shapes to obtain the most accurate peak areas.<sup>5,8,11,12</sup>

**Determination of Surface Coverage by ICP-MS.** Inductively coupled plasma mass spectrometry (ICP-MS) was conducted on a Thermo iCAP RQ ICP-MS instrument with prepared standards and samples. The standards were prepared from an iridium standard with a concentration of  $1\mu\text{g}/\text{ml}$  in 10-20% HCl solution from Acros Organics. Trace metal concentrated HCl (Fisher Chemical) and trace metal concentrated  $\text{HNO}_3$  (Fisher Chemical) were used and diluted to the appropriate concentrations. The standards were prepared in 1% HCl with concentrations of 1000ppb Ir, 100ppb Ir, 10ppb Ir, 1ppb Ir, and 0 ppb. The samples were digested in a 17% HCl solution overnight then diluted with  $18.2\text{ M}\Omega\cdot\text{cm}$  water to a 1% HCl solution for analysis. The digestion Teflon tube was cleaned prior with a 1%  $\text{HNO}_3$  solution and left to air dry.

#### **Characterization of SAMs by X-ray photoelectron spectroscopy (XPS).**

XPS was done on gold slides prepared identically to the PM-IRRAS and ICP-MS experiments. XPS survey spectra were recorded with a pass energy of 160 eV with a 1eV step. High-resolution spectra of the Au 4f, C 1s, N 1s, S 2p, Cl 2p, and Ir 4f/Au 5p<sub>3/2</sub> were recorded with a pass energy of 20 eV. Data processing and analysis was done using CasaXPS. The binding energy of all spectra was energy corrected to the Au 4f<sub>7/2</sub> line at 84.0 eV as reference. Background correction was carried out using a Shirley background for all signals. High-resolution spectra was fit with a mix of Gaussian and Lorentzian line shapes to obtain the most accurate peak areas.

## NMR Spectra

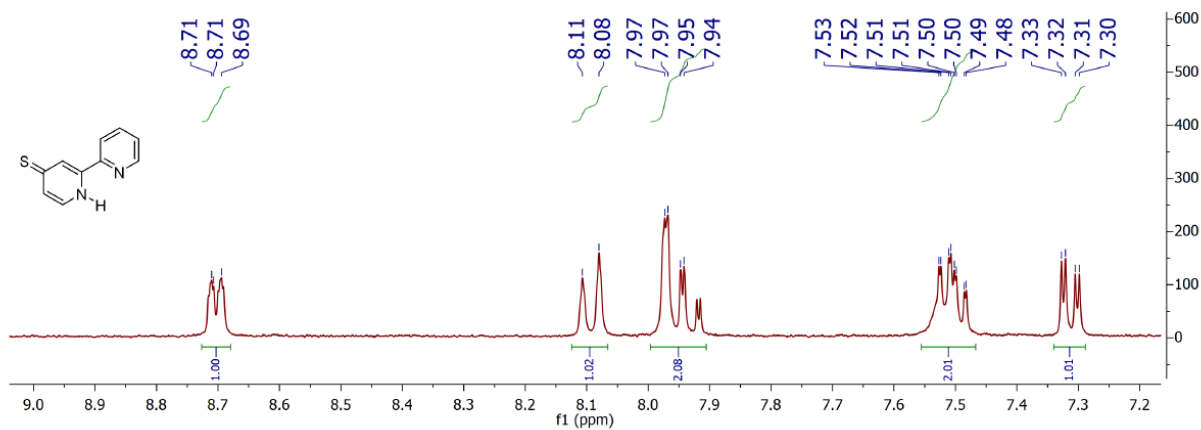

Figure S1. <sup>1</sup>H NMR (300 MHz) spectrum of 4-thione-2,2'-bipyridine in CD<sub>3</sub>CN (aromatic region).

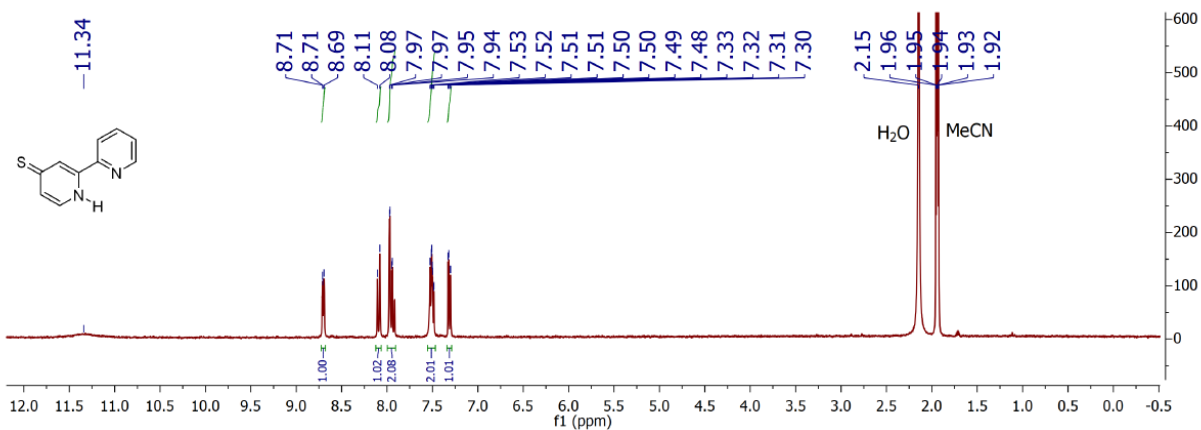

Figure S2. <sup>1</sup>H NMR (300 MHz) spectrum of 4-thione-2,2'-bipyridine in CD<sub>3</sub>CN



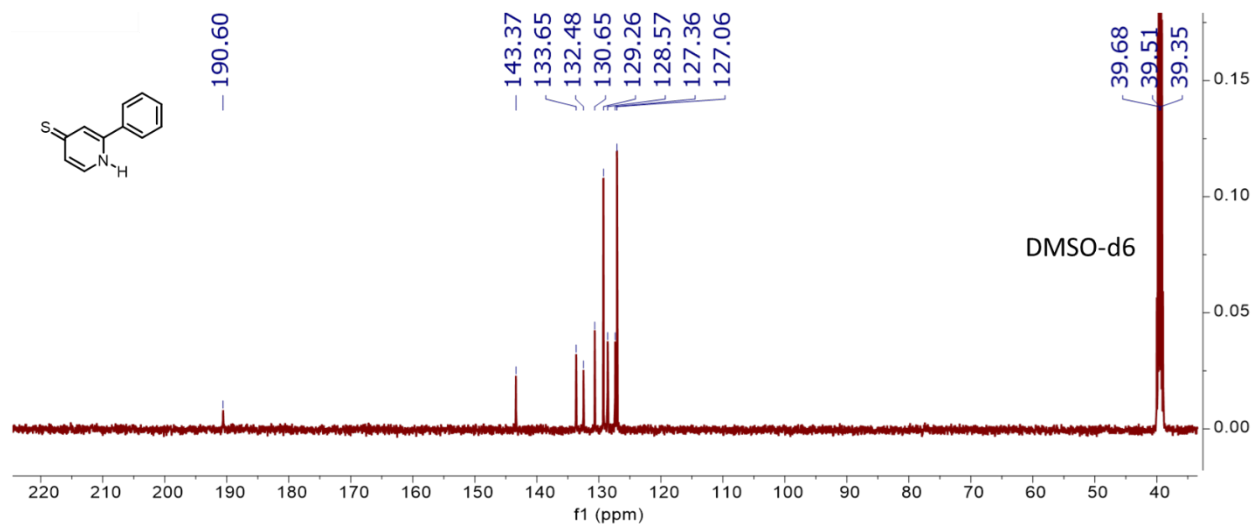

Figure S6.  $^{13}\text{C}\{^1\text{H}\}$  NMR (126 MHz) spectrum of 4-thione-2-phenylpyridine in  $(\text{CD}_3)_2\text{SO}$

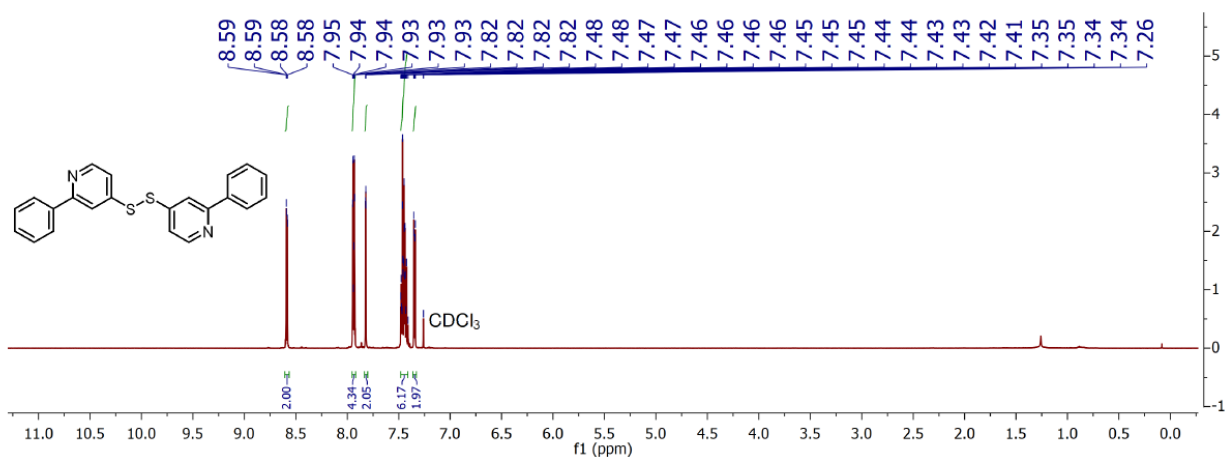

Figure S7.  $^1\text{H}$  NMR (500 MHz) spectrum of di(2-phenylpyridine)-4-disulfide in  $\text{CDCl}_3$

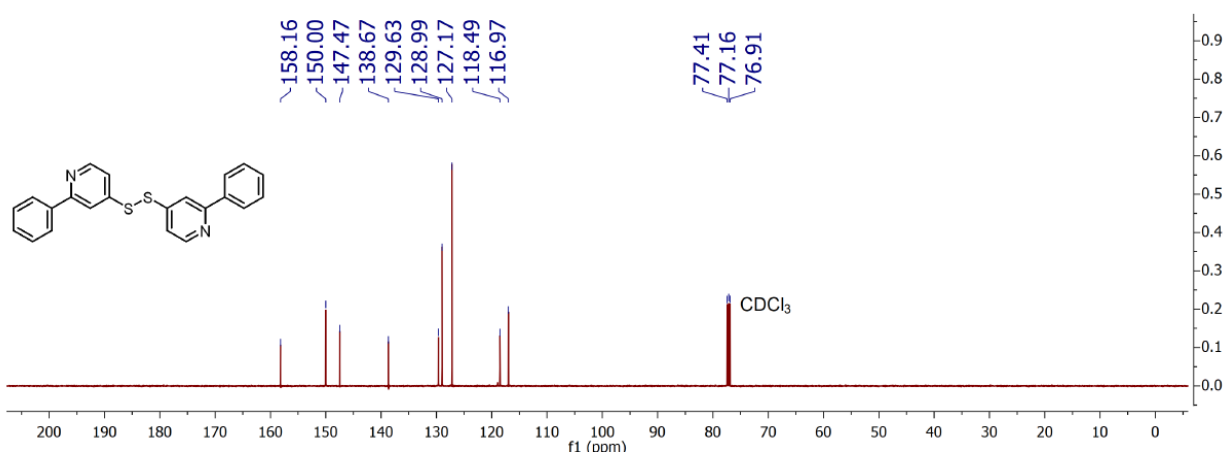

Figure S8.  $^{13}\text{C}\{^1\text{H}\}$  NMR (126 MHz) spectrum of di(2-phenylpyridine)-4-disulfide in  $\text{CDCl}_3$



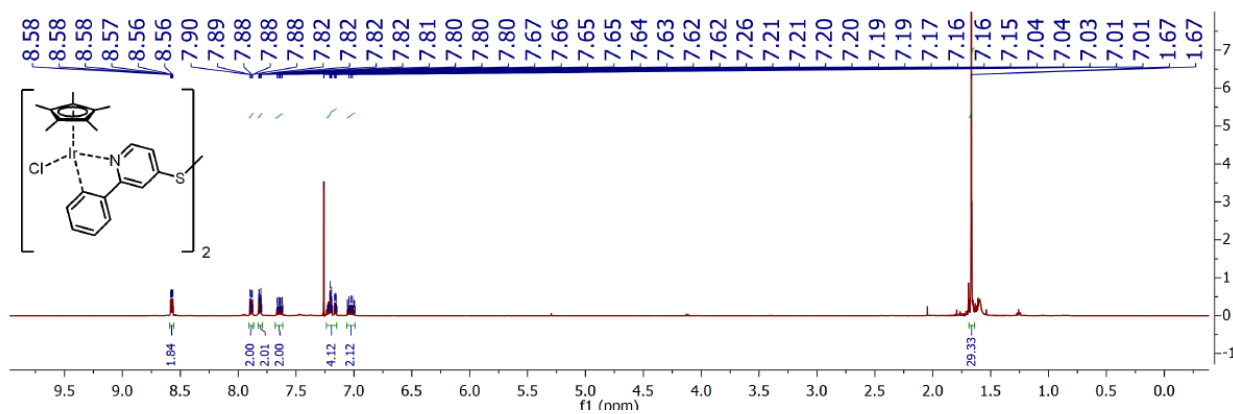

Figure S12.  $^1\text{H}$  NMR (500 MHz) spectrum of **C2**  $[\text{Cp}^*\text{Ir}(2\text{-phenylpyridine-4-sulfide})\text{Cl}]_2$  (statistical mixture of diastereomers) in  $\text{CDCl}_3$

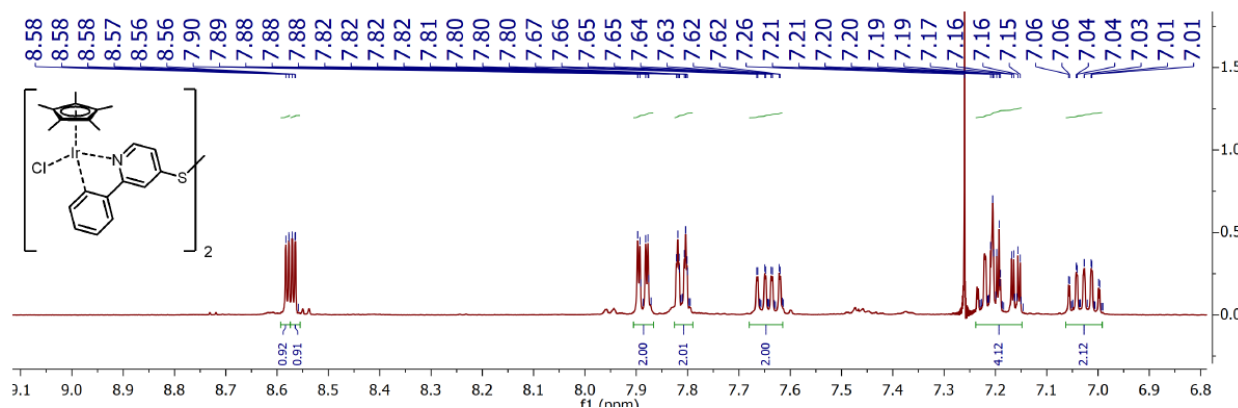

Figure S13.  $^1\text{H}$  NMR (500 MHz) spectrum of **C2**  $[\text{Cp}^*\text{Ir}(2\text{-phenylpyridine-4-sulfide})\text{Cl}]_2$  (statistical mixture of diastereomers) in  $\text{CDCl}_3$  (aromatic region).

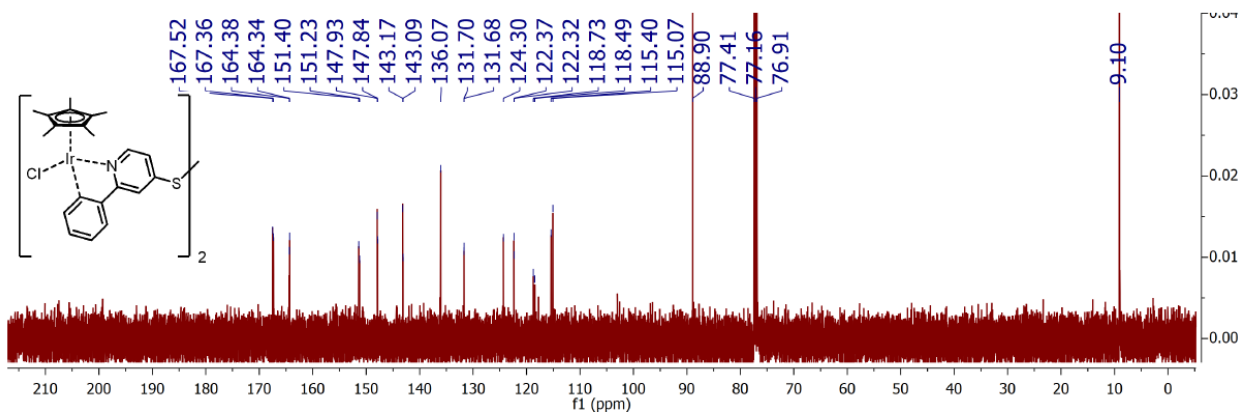

Figure S14.  $^{13}\text{C}$   $\{^1\text{H}\}$  NMR (126 MHz) spectrum of **C2**  $[\text{Cp}^*\text{Ir}(2\text{-phenylpyridine-4-sulfide})\text{Cl}]_2$  (statistical mixture of diastereomers) in  $\text{CDCl}_3$



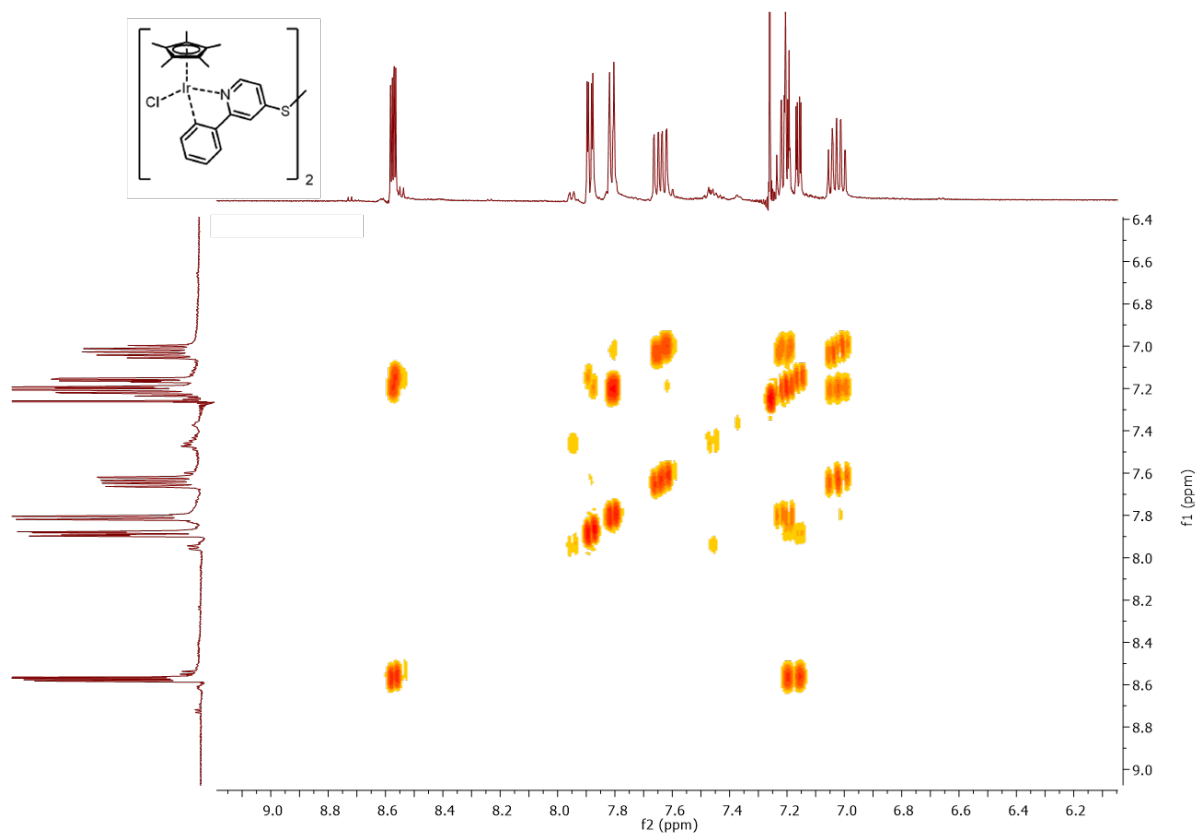

Figure S15. COSY NMR (500 MHz) spectrum of **C2**  $[\text{Cp}^*\text{Ir}(2\text{-phenylpyridine-4-sulfide})\text{Cl}]_2$  (statistical mixture of diastereomers) in  $\text{CDCl}_3$

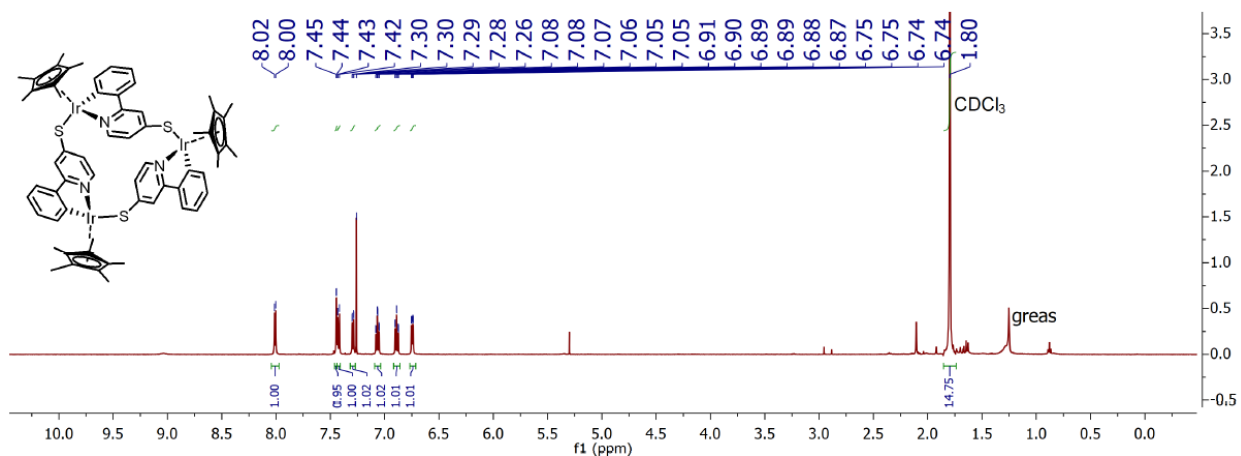

Figure S16.  $^1\text{H}$  NMR (500 MHz) spectrum of **C3**  $[\text{Cp}^*\text{Ir}(2\text{-phenylpyridine-4-thiol})]_3$  in  $\text{CDCl}_3$

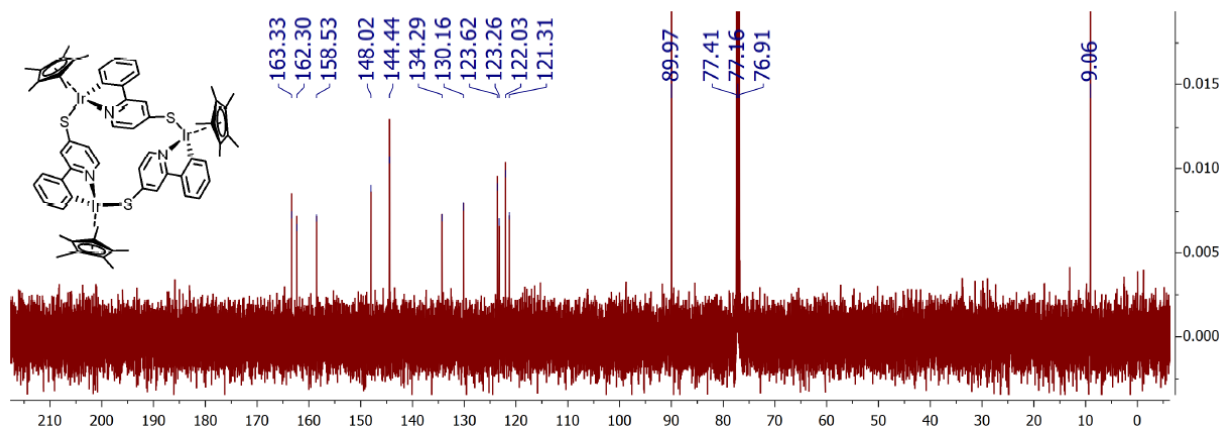

Figure S17.  $^{13}\text{C}\{^1\text{H}\}$  NMR (126 MHz) spectrum of **C3**  $[\text{Cp}^*\text{Ir}(\text{2-phenylpyridine-4-thiol})_3]$  in  $\text{CDCl}_3$

## IR-Spectra

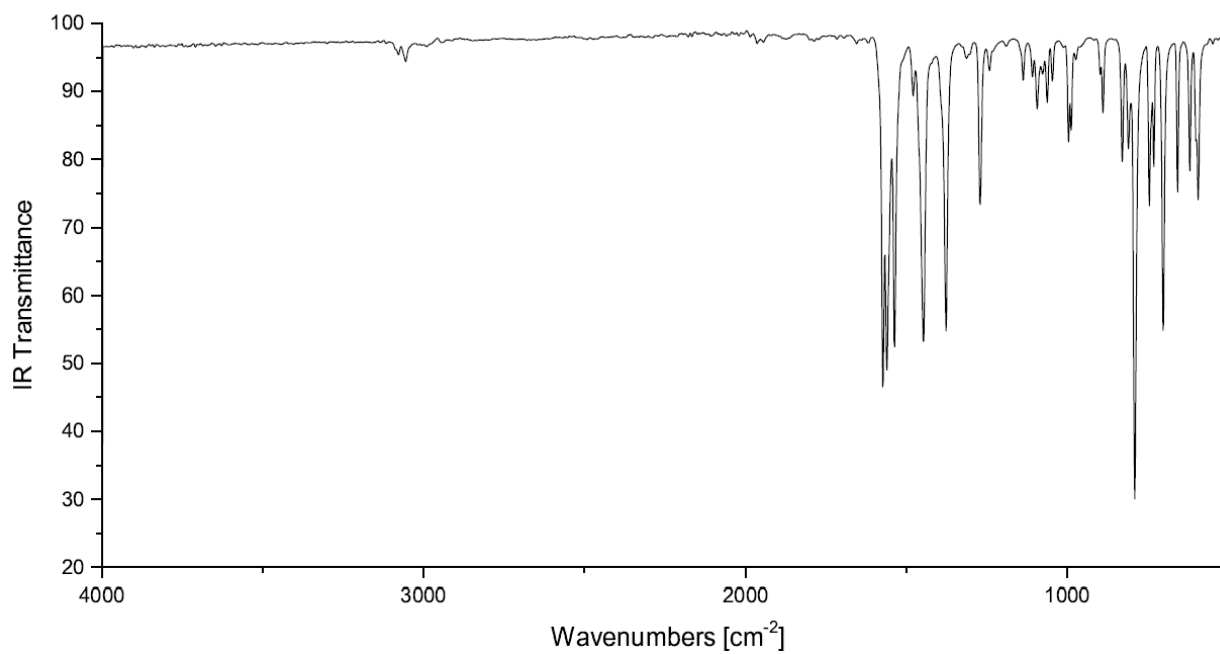

Figure S18. FT-IR (ATR) spectrum of di(2,2'-bipyridine)-4-disulfide

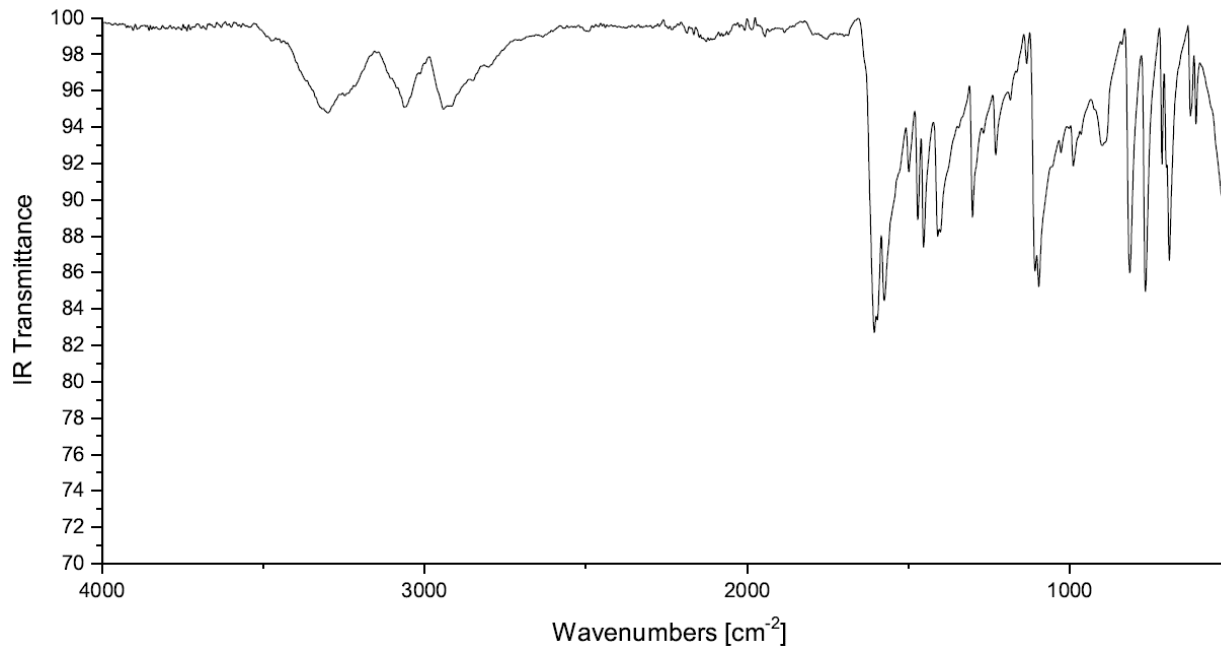

Figure S19. FT-IR (ATR) spectrum of 4-thione-2-phenylpyridine

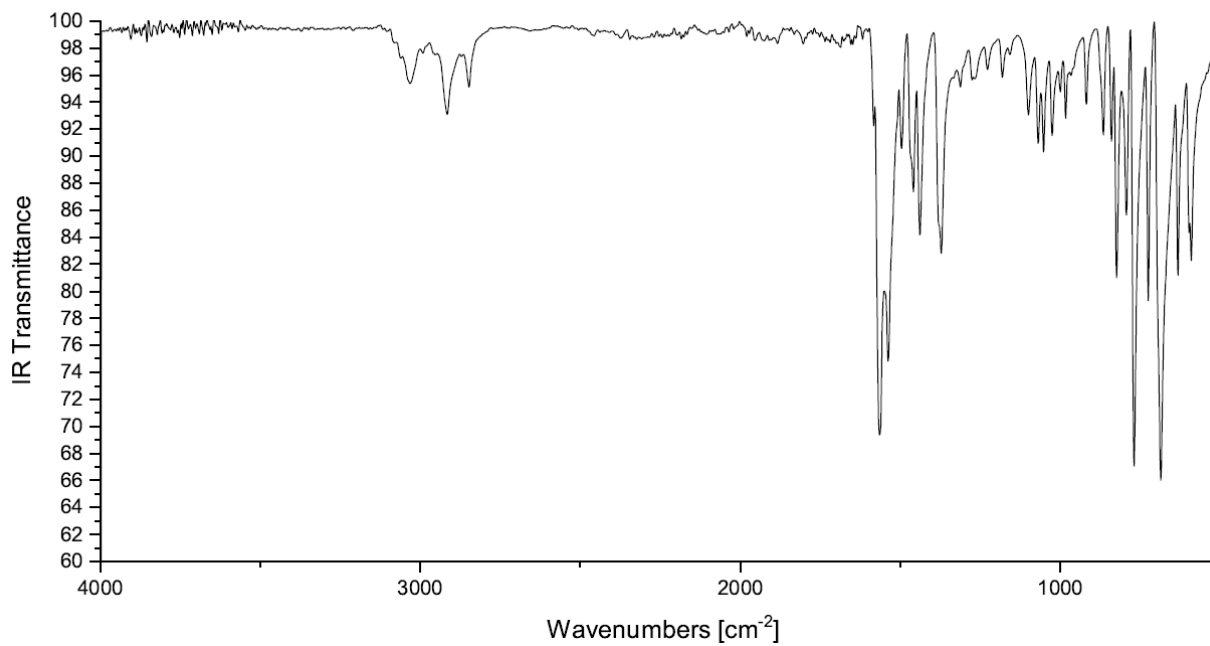

Figure S20. FT-IR (ATR) spectrum of di(2-phenylpyridine)-4-disulfide

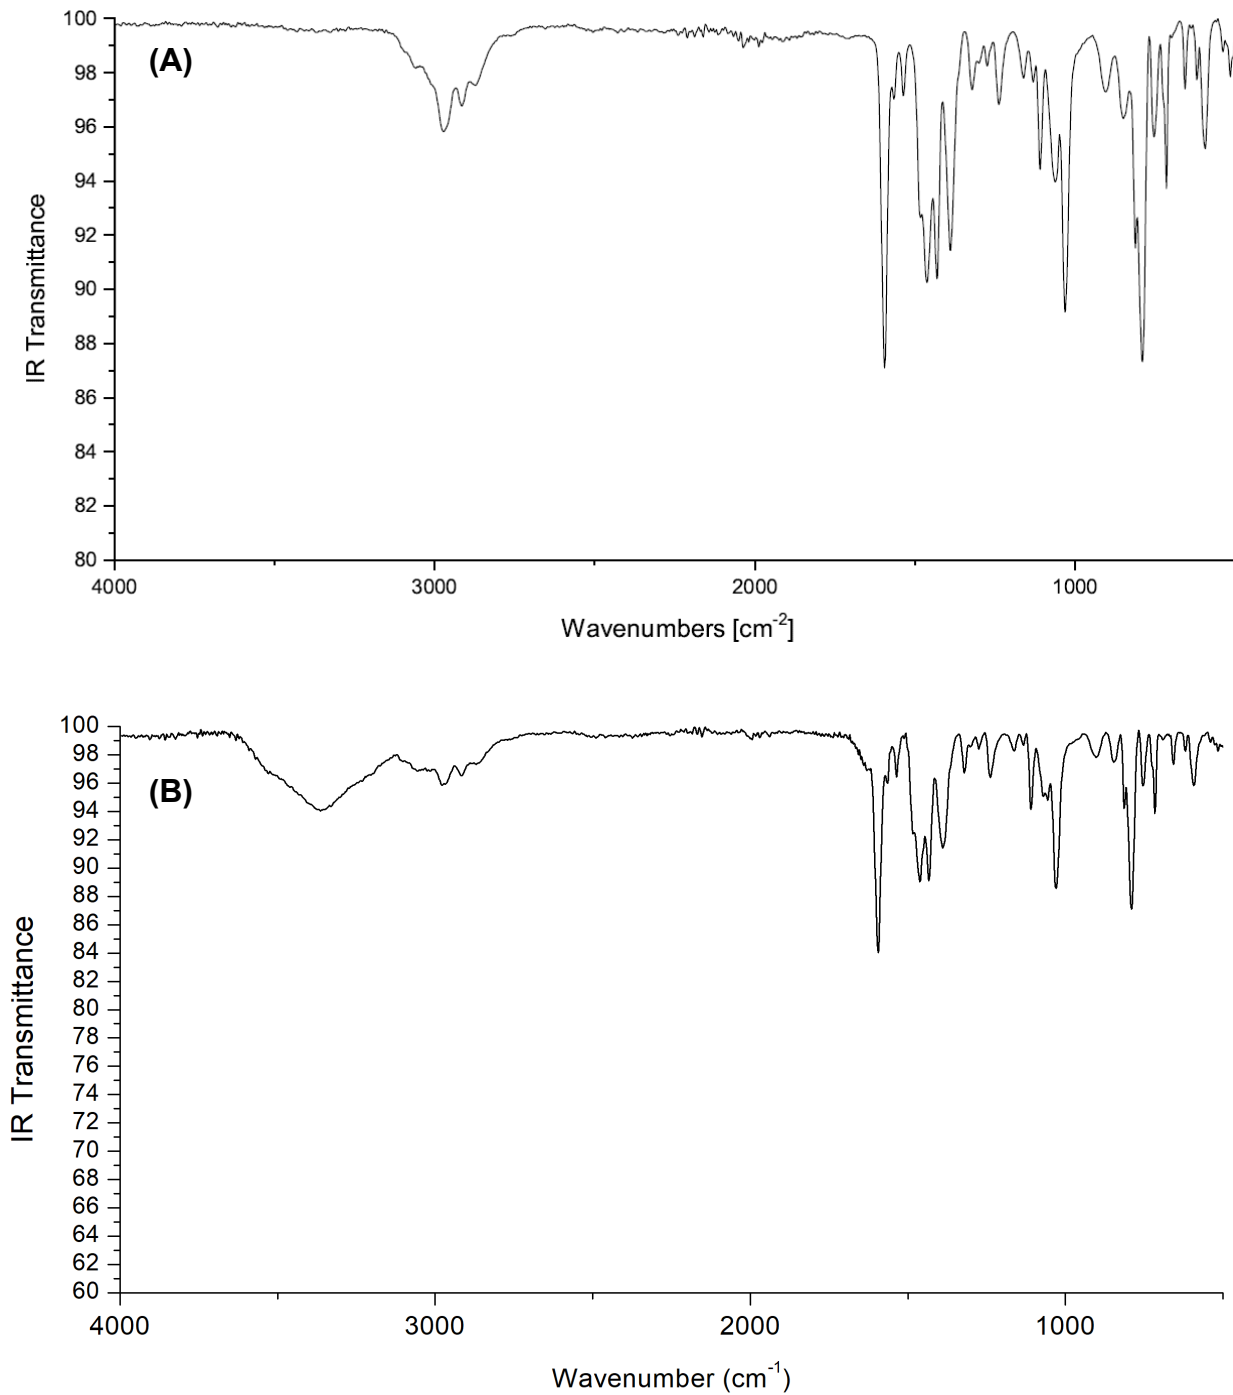

Figure S21. FT-IR (ATR) spectrum of **C1** [ $\text{Cp}^*\text{Ir}((2,2'\text{-bipyridine-4-sulfide})\text{Cl})_2\text{Cl}_2$ ] in (A) in inert atmosphere and (B) in air following removal from the glovebox. (B) shows a broad water peak as a result of the hydroscopic nature of C1.

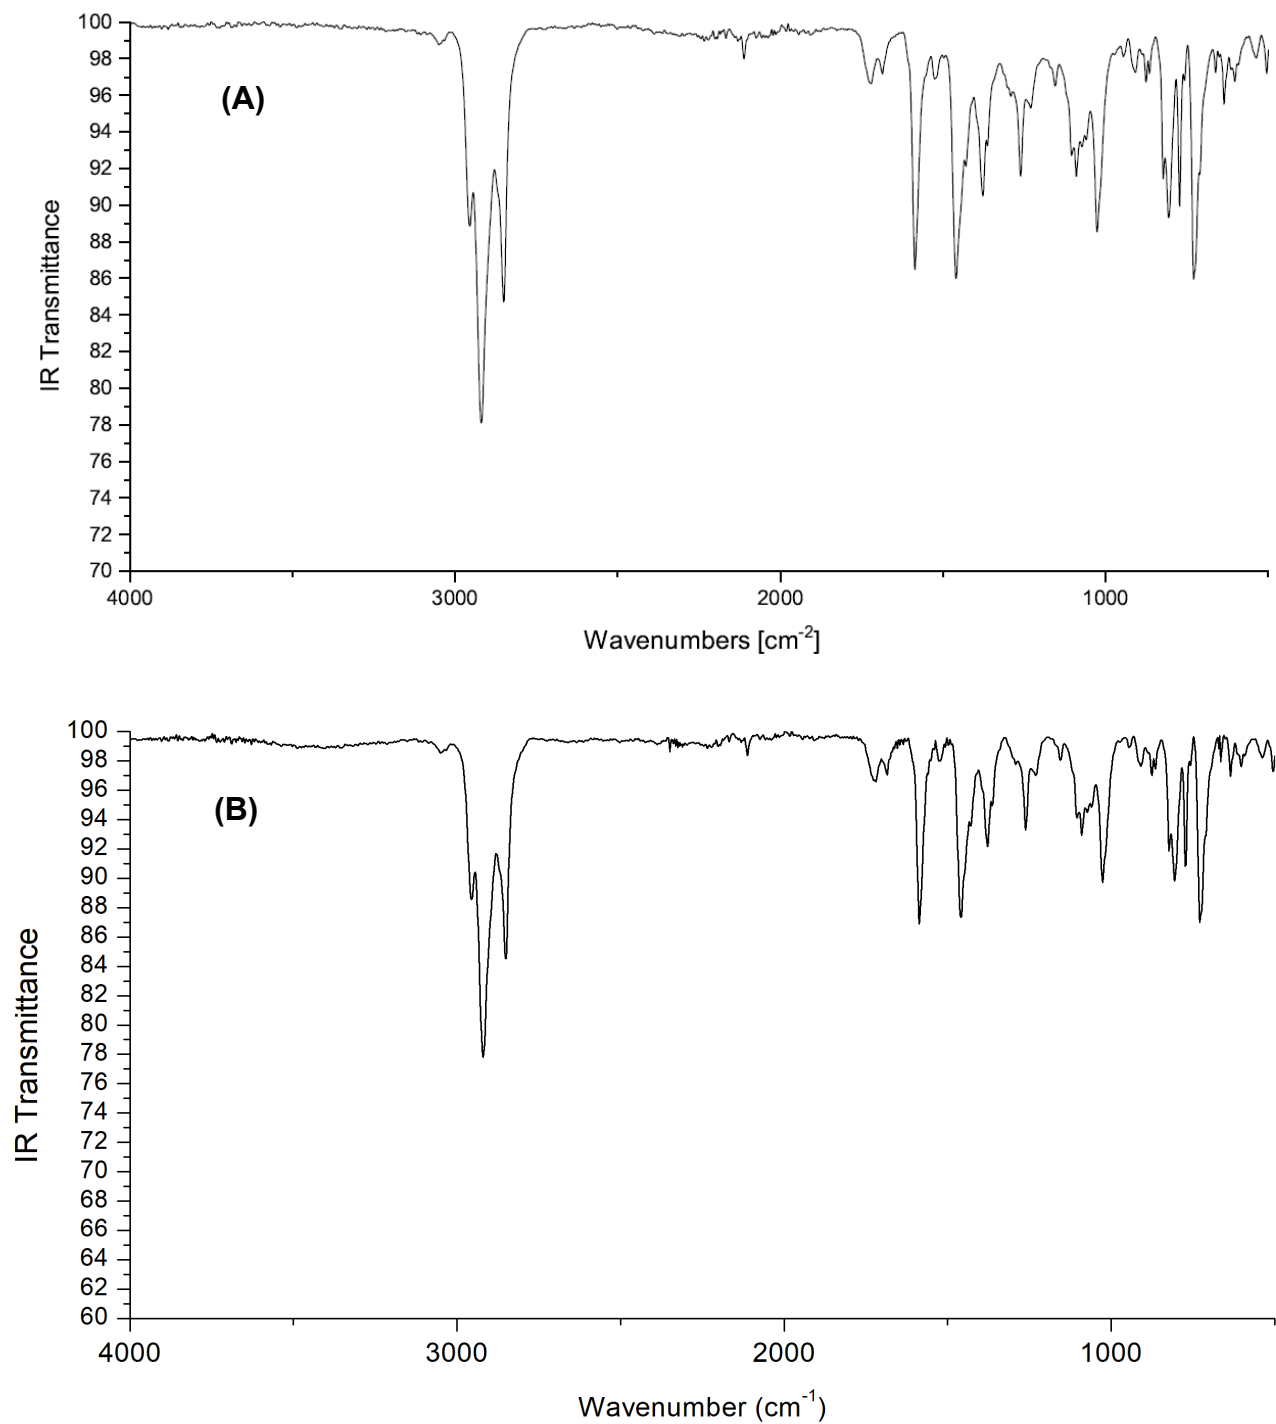

Figure S22. FT-IR (ATR) spectrum of **C2** [Cp\*Ir(2-phenylpyridine-4-sulfide)Cl]<sub>2</sub> (A) in the glovebox and the same sample (B) in air. (B) shows small, broad water peak showing that **C2** is a little hygroscopic.

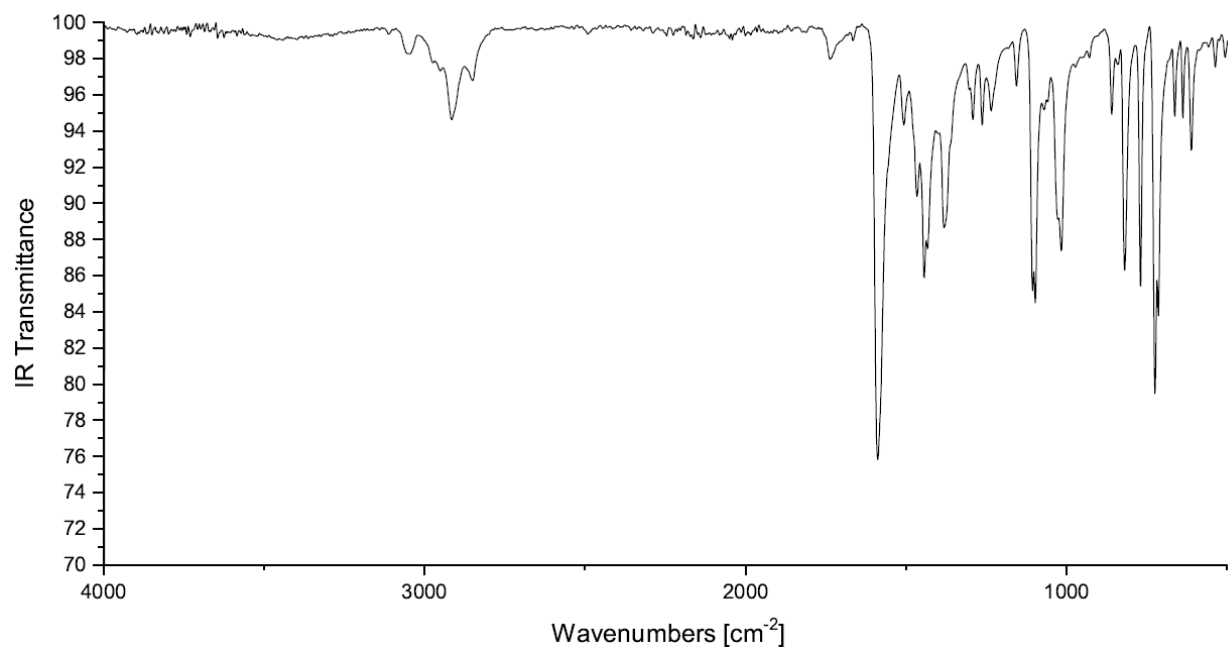

Figure S23. FT-IR (ATR) spectrum of **C3** [Cp\*Ir(2-phenylpyridine-4-thiol)<sub>3</sub>]

## FTIR Spectra of KBr Pellets

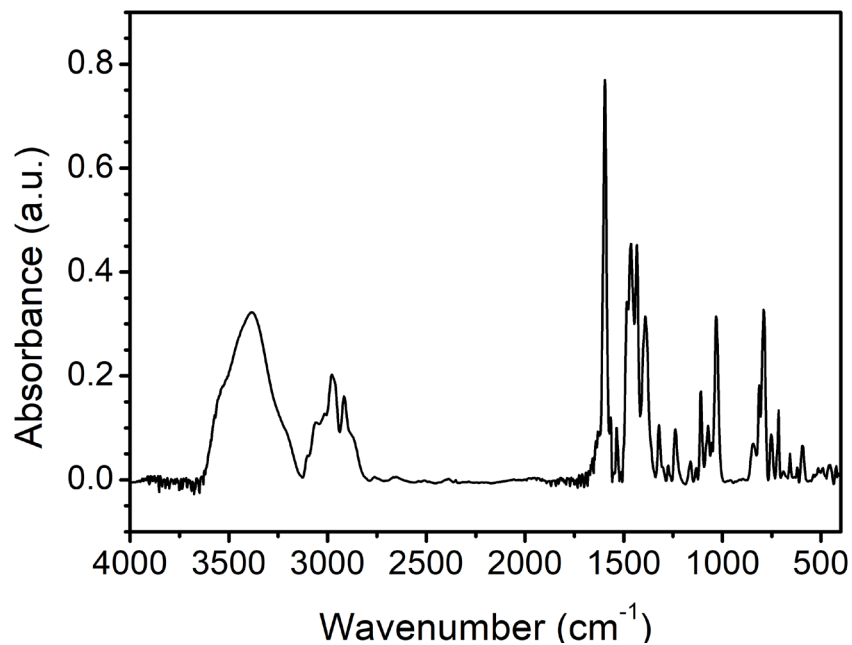

Figure S24. FTIR of **C1** in a KBr pellet in air.

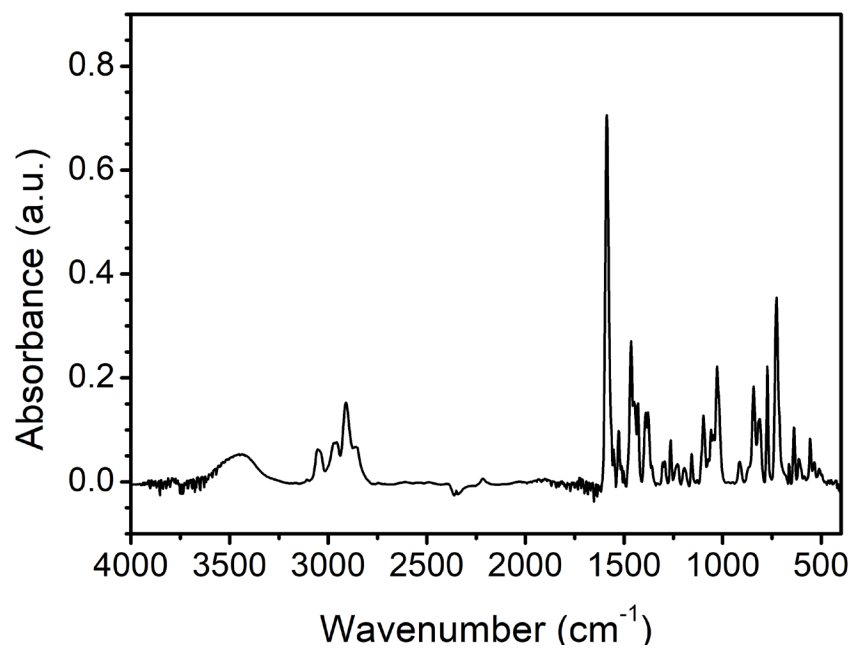

Figure S25. FTIR of **C2** in a KBr pellet in air.

## Molar Absorptivity and Refractive Index

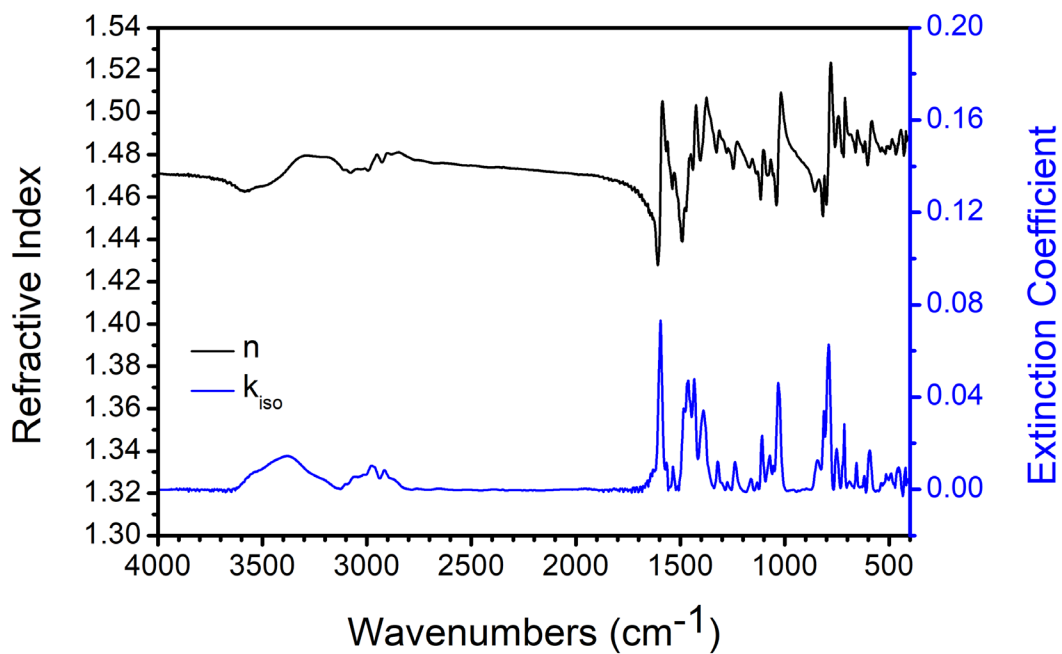

Figure 26. Extinction coefficient,  $k_{\text{iso}}$ , of C1 obtained from IR-transmission spectroscopy. Refractive index,  $n$ , of C1 obtained from the Kramers-Krönig transformation of  $k$ .

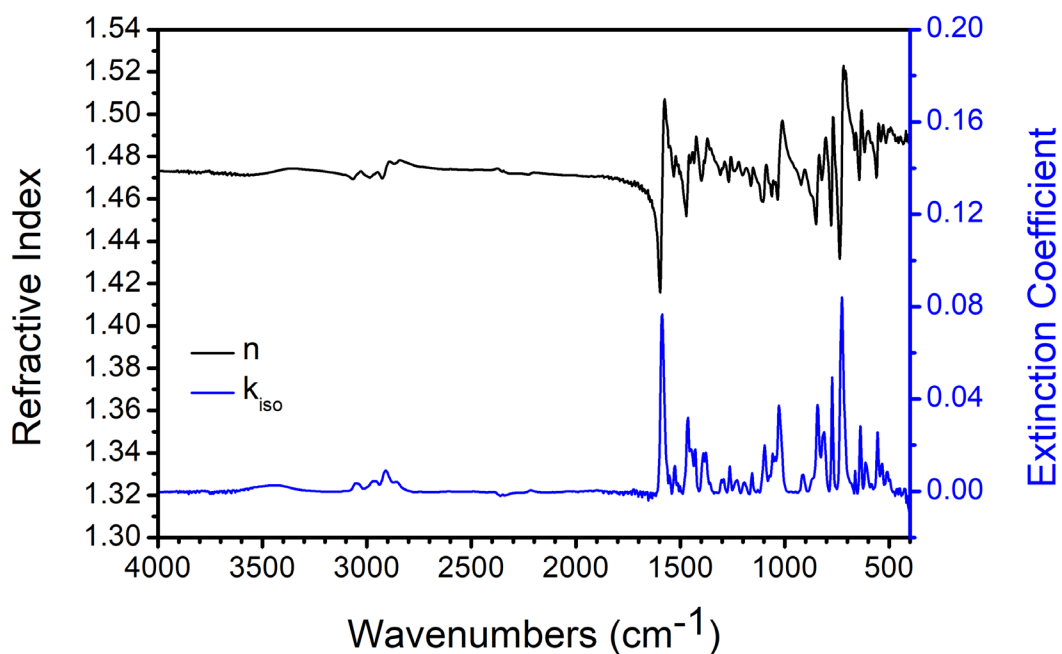

Figure S27. Extinction coefficient,  $k_{\text{iso}}$ , of C2 obtained from IR-transmission spectroscopy. Refractive index,  $n$ , of C2 obtained from the Kramers-Krönig transformation of  $k$ .



## Mass Spectra

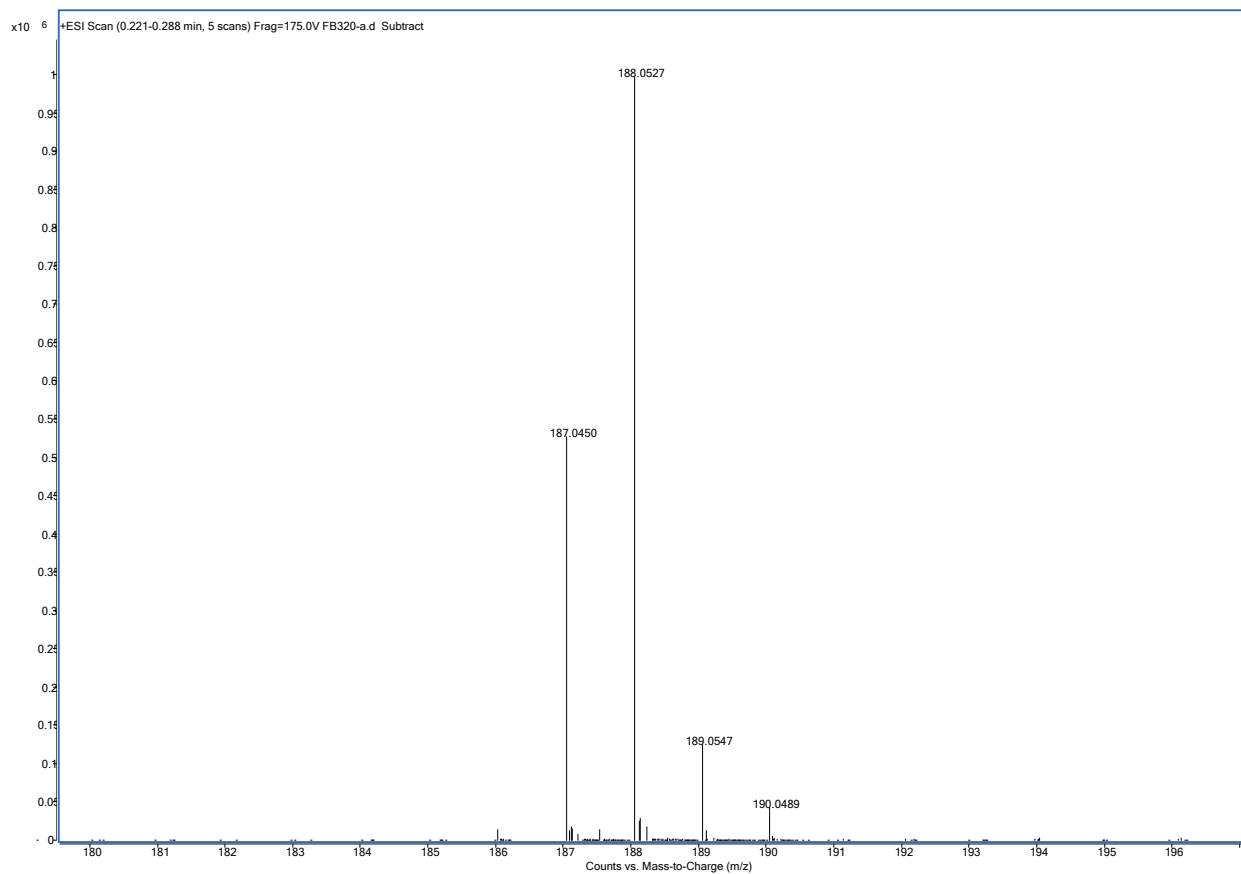

Figure S28. Measured HR-ESI-MS for 4-thione-2-phenylpyridine (**ppy=S**). m/z calcd for [M]<sup>+</sup> 188.0527 (found) 188.052; calcd for [M + H]<sup>+</sup> 187.0450 (found) 187.0450.

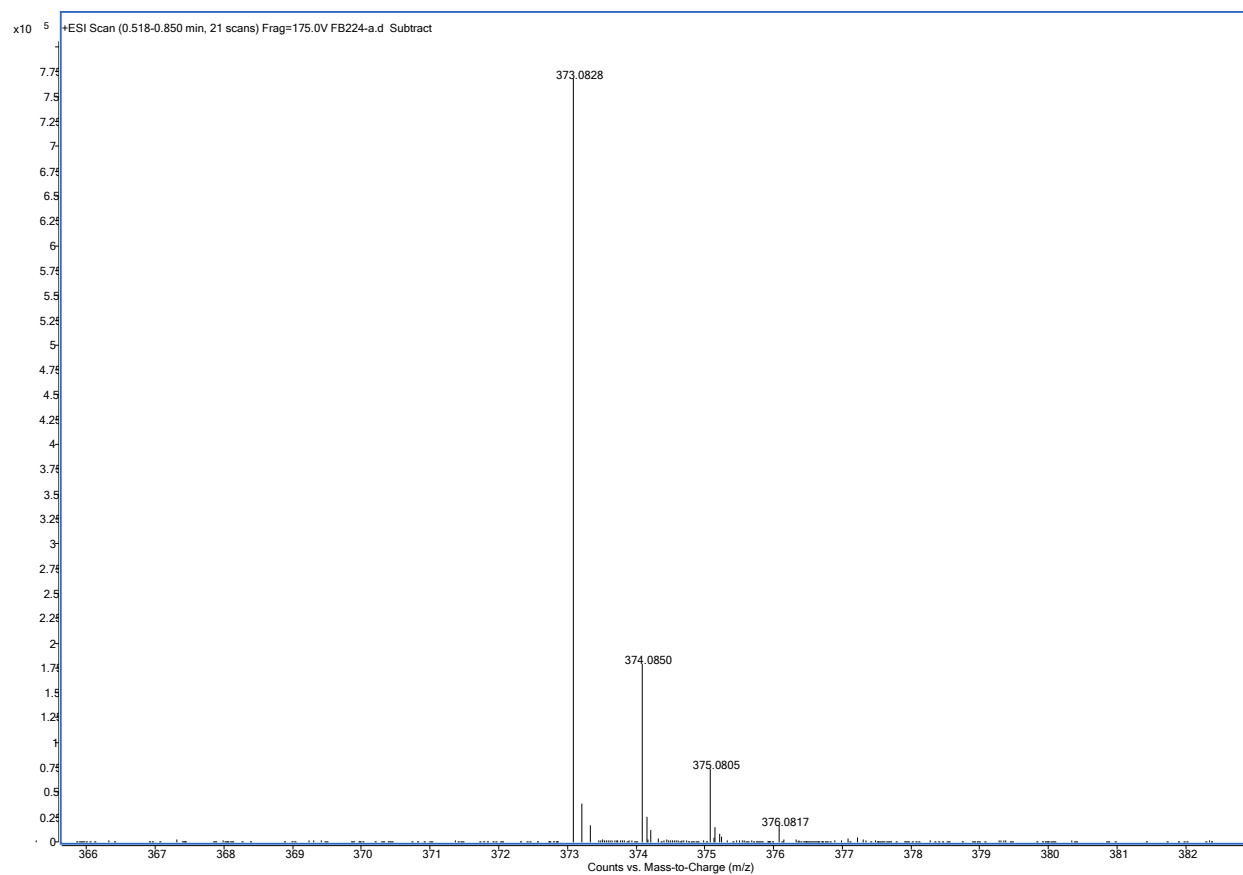

Figure S29. Measured HR-ESI-MS for di(2-phenylpyridine)-4-disulfide (**ppySSppy**). m/z calcd for  $[M + H]^+$  373.0828 (found) 373.0828.

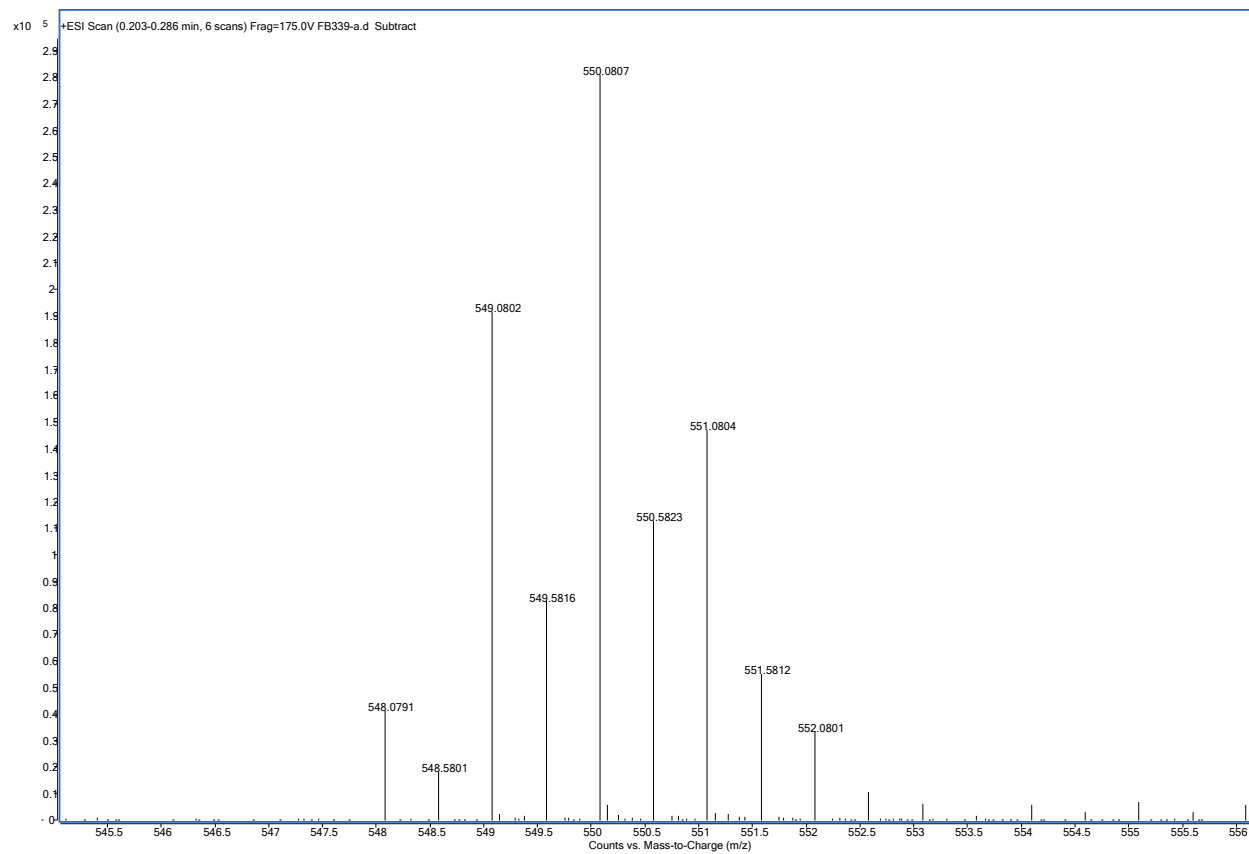

Figure S30. Measured HR-ESI-MS of **C1** ( $[M-2Cl]^{2+}$ ).

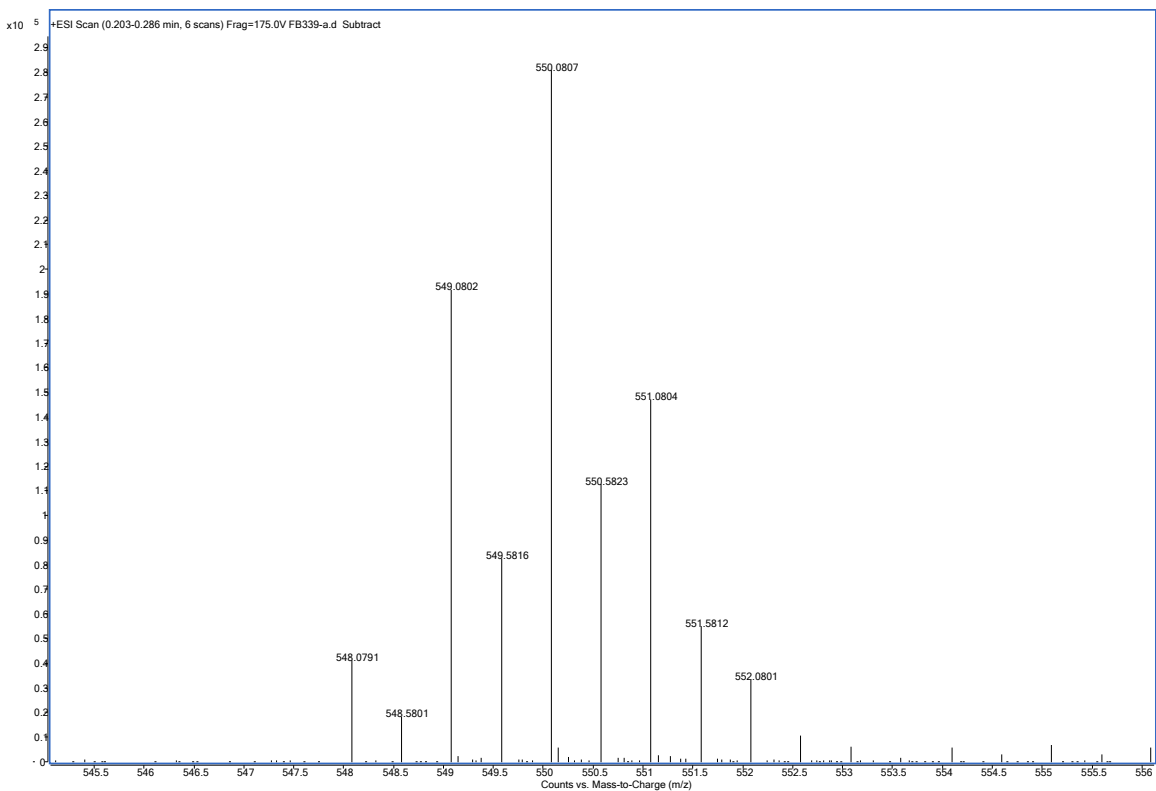

Figure S31. Measured high-resolution mass spectra of **C2** ( $[M-2Cl]^{2+}$ ).

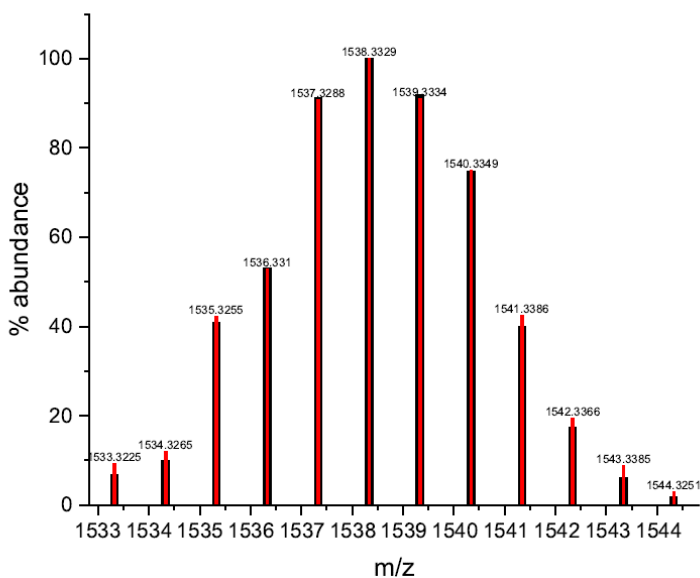

Figure S32. Measured high-resolution mass spec of **C3** (red) and linear combination of calculated mass spec of  $[M]^+$  /  $[M + H]^+$  at a ratio of 58% / 42% (black).

## ICP-MS determination of surface coverage

Table S1. Variables used in the determination of complex surface coverage using inductively-coupled plasma mass spectrometry.

|                                         | C1          | C2          |
|-----------------------------------------|-------------|-------------|
| Au slide dimensions                     | 0.85cmx1cm  | 2x1.2cm     |
| Digested Solution Mass (kg)             | 0.0110634   | 0.01563852  |
| Ir concentration in digestion (ppb)     | 18.4613     | 6.4887      |
| Ir determined (mol)                     | 1.06256E-09 | 5.279E-10   |
| Surface Coverage (mol/cm <sup>2</sup> ) | 1.25007E-09 | 2.19958E-10 |

## Parameters for IRRAS Simulation

Table S2. Variables used in simulation of the IRRAS spectra from the KBr of the complex using the Kramers-Kronig transformation.

|                                                                   | C1         | C2         |
|-------------------------------------------------------------------|------------|------------|
| KBr Mass (g)                                                      | 0.4106     | 0.4075     |
| Modifier Mass (g)                                                 | 0.0014     | 0.0025     |
| Pellet Mass (g)                                                   | 0.2208     | 0.1088     |
| Pellet KBr mass (g)                                               | 0.2200     | 0.1081     |
| Pellet Compound Mass (g)                                          | 0.0008     | 0.0007     |
| KBr Pellet Thickness (cm)                                         | 0.228      | 0.119      |
| Volume KBr Pellet (cm <sup>3</sup> )                              | 0.0910     | 0.0475     |
| Density (g/cm <sup>3</sup> )                                      | 1.555      | 1.555      |
| Molar Mass (g/mol)                                                | 1171.17    | 1096.28    |
| Pure Molar Concentration (C <sub>0</sub> ) in mol/cm <sup>3</sup> | 0.001328   | 0.001418   |
| Molar Concentration in KBr (C) in mol/cm <sup>3</sup>             | 7.0375E-06 | 1.2737E-05 |
| k' -> k conversion (C <sub>0</sub> /C)                            | 188.67     | 111.36     |
| Surface Coverage $\Gamma$ (molecules/cm <sup>2</sup> )            | 7.528E+14  | 1.325E+14  |
| Monolayer Thickness (cm)                                          | 8.341E-08  | 8.391E-08  |

## Raw PM-IRRAS

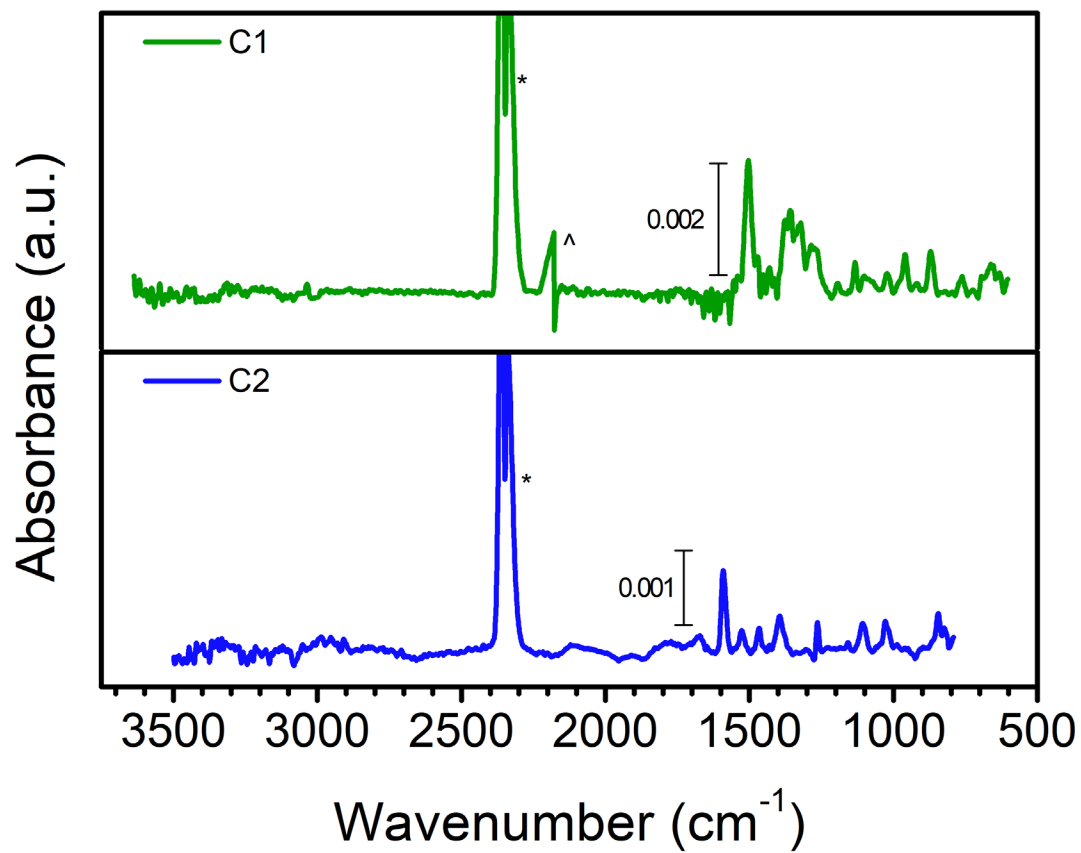

Figure S33. PM-IRRAS of C1 (green) and C2 (blue) on Au. Figure is combined spectra taken with maximum dephasing at 3000 cm<sup>-1</sup> and 1600 cm<sup>-1</sup> to minimize PM error across the entire spectra. \* indicates atmospheric CO<sub>2</sub> and ^ is where the two spectra are combined.

## PM-IRRAS and Simulated IRRAS with Fits

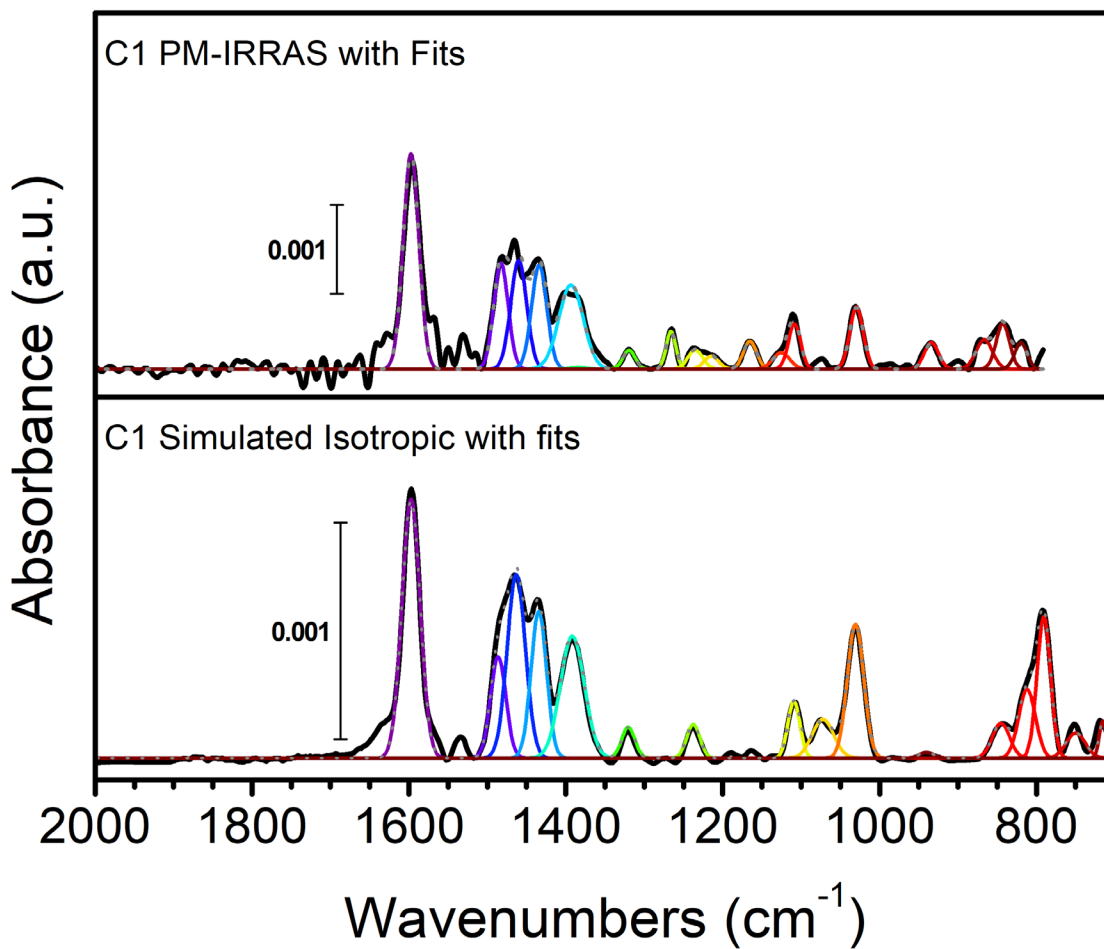

Figure S34. PM-IRRA (top) and simulated IRRA (bottom) spectra with fits of a monolayer made from C1. The PM-IRRA spectrum is fit with Gaussian line shapes and the simulated IRRA spectrum is fit with a combination of Lorentzian and Gaussian line shapes.

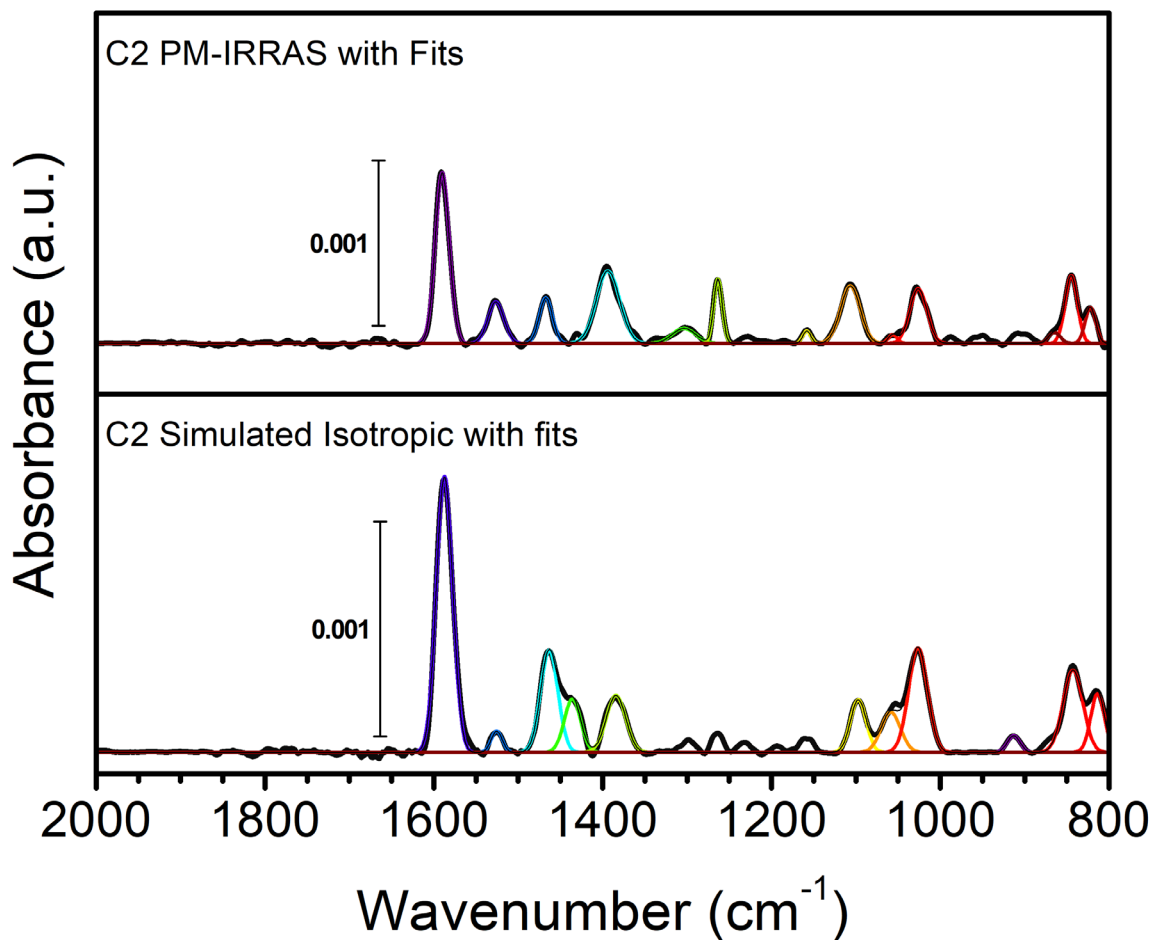

Figure S35. PM-IRRA (top) and simulated IRRA (bottom) spectra with fits of a monolayer made from C2 on Au. The PM-IRRA spectrum is fit with Gaussian line shapes and the simulated IRRA spectrum is fit with a combination of Lorentzian and Gaussian line shapes.



## PM-IRRAS Peak Fitting Analysis

Table S3. Vibrational modes and their determined transition dipole moments dependent on the density of the complex used in the simulated IRRAS spectra with respect to normal ( $\theta$ ) used for orientation determination of the C1 monolayer on Au.

| Peak PM | PM-IRRAS Area | Peak Sim | Sim Area (1.55 g/cm <sup>3</sup> ) | $\theta$ (°) | Sim Area (1.2 g/cm <sup>3</sup> ) | $\theta$ (°) (1.2 g/cm <sup>3</sup> ) | Sim Area (2.0 g/cm <sup>3</sup> ) | $\theta$ (°) (2.0 g/cm <sup>3</sup> ) | Transition                                             | Reference |
|---------|---------------|----------|------------------------------------|--------------|-----------------------------------|---------------------------------------|-----------------------------------|---------------------------------------|--------------------------------------------------------|-----------|
| 1596    | 0.0745        | 1597     | 0.04283                            | 40           | 0.03244                           | 29                                    | 0.04283                           | 48                                    | bipyridine breathing modes                             | 13, 14    |
| 1488    | 0.02344       | 1486     | 0.00919                            | 23           | 0.00696                           | 0                                     | 0.00919                           | 36                                    | C-H bending (bipyridine, Cp*)                          | 13        |
| 1466    | 0.02734       | 1464     | 0.02861                            | 56           | 0.02167                           | 50                                    | 0.02861                           | 60                                    | C-H bending (Cp*)                                      | 15-18     |
| 1441    | 3.74E-02      | 1435     | 0.01922                            | 36           | 0.01456                           | 22                                    | 0.01922                           | 45                                    | C-H bending (Cp*)                                      | 15-18     |
| 1390    | 0.0343        | 1391     | 0.01832                            | 38           | 0.01388                           | 25                                    | 0.01832                           | 46                                    | C-H bending (Cp*)<br>Cp* breathing asymmetric          | 16-18     |
| 1318    | 0.00252       | 1320     | 0.00317                            | 59           | 0.00241                           | 54                                    | 0.00318                           | 63                                    | C-H bending, C-C breathing mix (bipyridine)            | 13        |
| 1229    | 0.00703       | 1237     | 0.00359                            | 36           | 0.00272                           | 22                                    | 0.00359                           | 45                                    | C-H bending, C-C breathing mix (bipyridine)            | 13        |
| 1110    | 0.01121       | 1110     | 0.00422                            | 20           | 0.00320                           | 0                                     | 0.00422                           | 34                                    | asymmetric C-H bending, C-C breathing mix (bipyridine) | 13        |
| 1075    | 0.00276       | 1074     | 0.00771                            | 70           | 0.00584                           | 67                                    | 0.00771                           | 72                                    | asymmetric C-H bending, C-C breathing mix (bipyridine) | 13        |
| 1027    | 0.01348       | 1031     | 0.01754                            | 60           | 0.01329                           | 54                                    | 0.01754                           | 64                                    | C-H bending (Cp*)                                      | 16-18     |
| 944     | 7.51E-04      | 940      | 0.00044                            | 41           | 0.00033                           | 30                                    | 0.00044                           | 49                                    | symmetric C-H bending (Cp*), Cp* vibration mix         | 16-18     |
| 839     | 0.00829       | 845      | 0.00380                            | 32           | 0.00288                           | 12                                    | 0.00381                           | 42                                    | out of plane C-H bending, bpy                          | 13        |
| 818     | 0.00624       | 813      | 0.00891                            | 61           | 0.00675                           | 56                                    | 0.00891                           | 65                                    | Bipyridine breathing                                   | 13        |

Table S4. Vibrational modes and their determined transition dipole moments dependent on the density of the complex used in the simulated IRRA spectra with respect to normal ( $\theta$ ) used for orientation determination of the C2 monolayer on Au.

| Peak PM | PM-IRRAS Area | Peak Sim | Sim Area (1.55 g/cm <sup>3</sup> ) | $\theta$ (°) (1.55 g/cm <sup>3</sup> ) | Sim Area (1.2 g/cm <sup>3</sup> ) | $\theta$ (°) (1.2 g/cm <sup>3</sup> ) | Sim Area (2.0 g/cm <sup>3</sup> ) | $\theta$ (°) (2.0 g/cm <sup>3</sup> ) | Transition                                                 | Reference       |
|---------|---------------|----------|------------------------------------|----------------------------------------|-----------------------------------|---------------------------------------|-----------------------------------|---------------------------------------|------------------------------------------------------------|-----------------|
| 1589    | 0.02207       | 1587     | 0.03189                            | 61                                     | 0.079792                          | 58                                    | 0.122355                          | 65                                    | phenylpyridine breathing modes                             | 19              |
| 1526    | 0.00693       | 1525     | 0.00234                            | 7                                      | 0.005863                          | 0                                     | 0.008991                          | 29                                    | phenylpyridine breathing mode                              | 19              |
| 1476    | 6.04E-03      | 1465     | 0.01190                            | 66                                     | 0.029792                          | 63                                    | 0.045683                          | 69                                    | C-H bend (Cp*) and Cp* breathing                           | 15-18           |
| 1448    | 4.84E-04      | 1451     | 0.01151                            | 83                                     | 0.028816                          | 83                                    | 0.044187                          | 84                                    | C-H bend (Cp*)                                             | 16-18           |
| 1431    | 7.95E-04      | 1428     | 0.00231                            | 70                                     | 0.00578                           | 68                                    | 0.008863                          | 73                                    | C-H bend (Cp*, phenylpyridine)                             | 16, 17          |
| 1395    | 0.01445       | 1390     | 0.00736                            | 36                                     | 0.018424                          | 28                                    | 0.028251                          | 44                                    | Cp* breathing, C-H bending (Cp*)                           | 16-18           |
| 1370    | 1.34E-03      | 1371     | 0.00107                            | 50                                     | 0.002694                          | 45                                    | 0.004131                          | 55                                    | C-H bending symmetric (Cp*)                                | 16-18           |
| 1300    | 6.12E-04      | 1299     | 0.00153                            | 69                                     | 0.003837                          | 66                                    | 0.005883                          | 71                                    | C-H bending asymmetric (ppy), phenylpyridine breathing mix | This work (DFT) |
| 1227    | 0.00115       | 1232     | 0.00094                            | 50                                     | 0.002369                          | 46                                    | 0.003632                          | 56                                    | C-H bending asymmetric (ppy)                               | 19              |
| 1186    | 3.61E-04      | 1193     | 0.00062                            | 64                                     | 0.00156                           | 61                                    | 0.002392                          | 67                                    | C-H bending asymmetric (ppy, Cp*)                          | This work (DFT) |
| 1158    | 1.17E-03      | 1159     | 0.00178                            | 62                                     | 0.004462                          | 59                                    | 0.006842                          | 66                                    | C-H bending asymmetric (ppy, Cp*)                          | This work (DFT) |
| 1104    | 9.75E-03      | 1097     | 0.00565                            | 41                                     | 0.014154                          | 34                                    | 0.021703                          | 48                                    | C-H bending asymmetric (ppy)                               | 19              |
| 1053    | 1.23E-03      | 1060     | 0.00574                            | 74                                     | 0.01437                           | 73                                    | 0.022036                          | 76                                    | C-H Methyl wagging (Cp*)                                   | 16-18           |

|             |          |             |         |           |          |           |          |           |                                     |                 |
|-------------|----------|-------------|---------|-----------|----------|-----------|----------|-----------|-------------------------------------|-----------------|
| <b>1028</b> | 7.03E-03 | <b>1031</b> | 0.01375 | <b>66</b> | 0.034404 | <b>63</b> | 0.052756 | <b>69</b> | phenylpyridine breathing            | 13, 19          |
| <b>912</b>  | 4.41E-04 | <b>913</b>  | 0.00179 | <b>73</b> | 0.004495 | <b>72</b> | 0.006893 | <b>75</b> | C-H Methyl Wagging asymmetric (Cp*) | 16, 17          |
| <b>865</b>  | 1.29E-03 | <b>870</b>  | 0.00109 | <b>51</b> | 0.002744 | <b>47</b> | 0.004208 | <b>56</b> | C-H bending ppy out of plane        | 19              |
| <b>845</b>  | 0.00761  | <b>845</b>  | 0.00712 | <b>53</b> | 0.017815 | <b>49</b> | 0.027318 | <b>58</b> | C-H bending ppy out of plane        | 13, 19          |
| <b>823</b>  | 0.00314  | <b>838</b>  | 0.00390 | <b>59</b> | 0.009775 | <b>55</b> | 0.014989 | <b>63</b> | C-H bending ppy out of plane        | 13, 19          |
| <b>815</b>  | 5.20E-04 | <b>814</b>  | 0.00713 | <b>81</b> | 0.017857 | <b>80</b> | 0.027382 | <b>82</b> | pyridine and phenyl mixed breathing | This work (DFT) |

## Computational Benchmarking

Benchmarking DFT calculations were performed with the  $\omega$ B97X-D functional<sup>20</sup> as well as the Perdew-Burke-Ernzerhof (PBE) functional<sup>21</sup> with Grimme's D3 dispersion with Becke-Johnson damping (D3-BJ).<sup>22</sup> The inclusion of dispersion was considered to be crucial to correctly describing ligand-Au interactions, and the PBE D3-BJ method had previously been shown to provide accurate and computationally accessible modeling bonds between molecules and Au.<sup>23</sup> Initial calculations were performed with the 6-31G(d,p) basis set<sup>24-26</sup> on all nonmetal atoms and the LANL2DZ basis set and pseudopotential<sup>27</sup> on Ir and Au. Although the minimum energy binding geometries were nearly identical for the two functionals (Table S5, S6 and 1), it was found that the  $\omega$ B97X-D stretching frequencies and IR intensities (after 0.9485 correction) showed much better agreement with the experiment (Figure S35 and S36). This was particularly evident for the highest intensity mode at  $\sim 1600\text{ cm}^{-1}$  corresponding to a bpy breathing mode; this peak showed low intensity using PBE D3-BJ, but was the most intense peak using  $\omega$ B97X-D. Given the poor agreement of the PBE D3-BJ spectrum, only the  $\omega$ B97X-D functional was used for further calculations with the larger DEF2SVP basis set and pseudopotential<sup>28</sup> on Ir and Au (Tables S11 and S12). These results were relatively similar to the LANL2DZ results but were used for all analysis in the main text since they corresponded to a larger, more polarizable metal basis set.

### **Comparison of the Experimental and DFT calculated TDMs for orientation determination.**

To determine the orientation of the monolayers on the Au surface, a comparison between the experimentally determined TDM and DFT ( $\omega$ B97X-D functional, DEF2SVP basis set) calculated TDM moments. Due to resolution limitations, the peaks determined experimentally correspond to multiple transitions calculated by DFT. Following literature precedent,<sup>29</sup> by considering all of the possible TDM calculated for a select mode with the experimentally determined data with similar energy, a comparison can be made. For example, the experimentally determined angle of the transition dipole moment for the bipyridine breath mode was determined to be  $40^\circ$  off normal. DFT calculated 4 bipyridine breathing modes. The average for the 4 transitions is about  $26^\circ$  for the Cl down and  $20^\circ$  for the Cl up orientation.

## DFT Computed FTIR

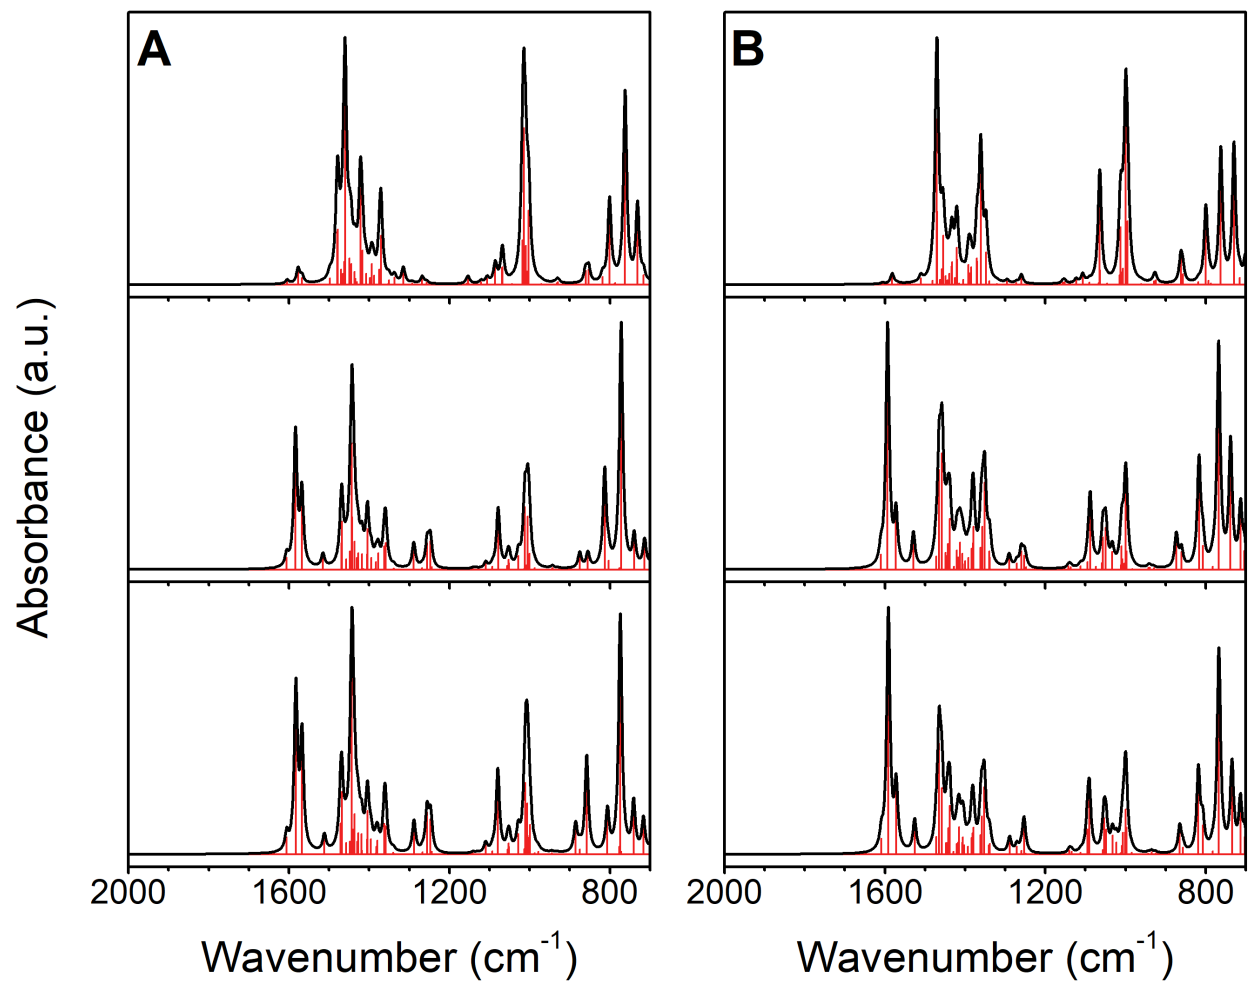

Figure S36. DFT calculated FTIR spectra of Cl attached to Au in **A** the Cl down orientation using (Original Basis) (top), LAN (middle), and DEF (bottom) and **B** Cl up orientation using (Original Basis) (top), LAN (middle), and DEF (bottom).

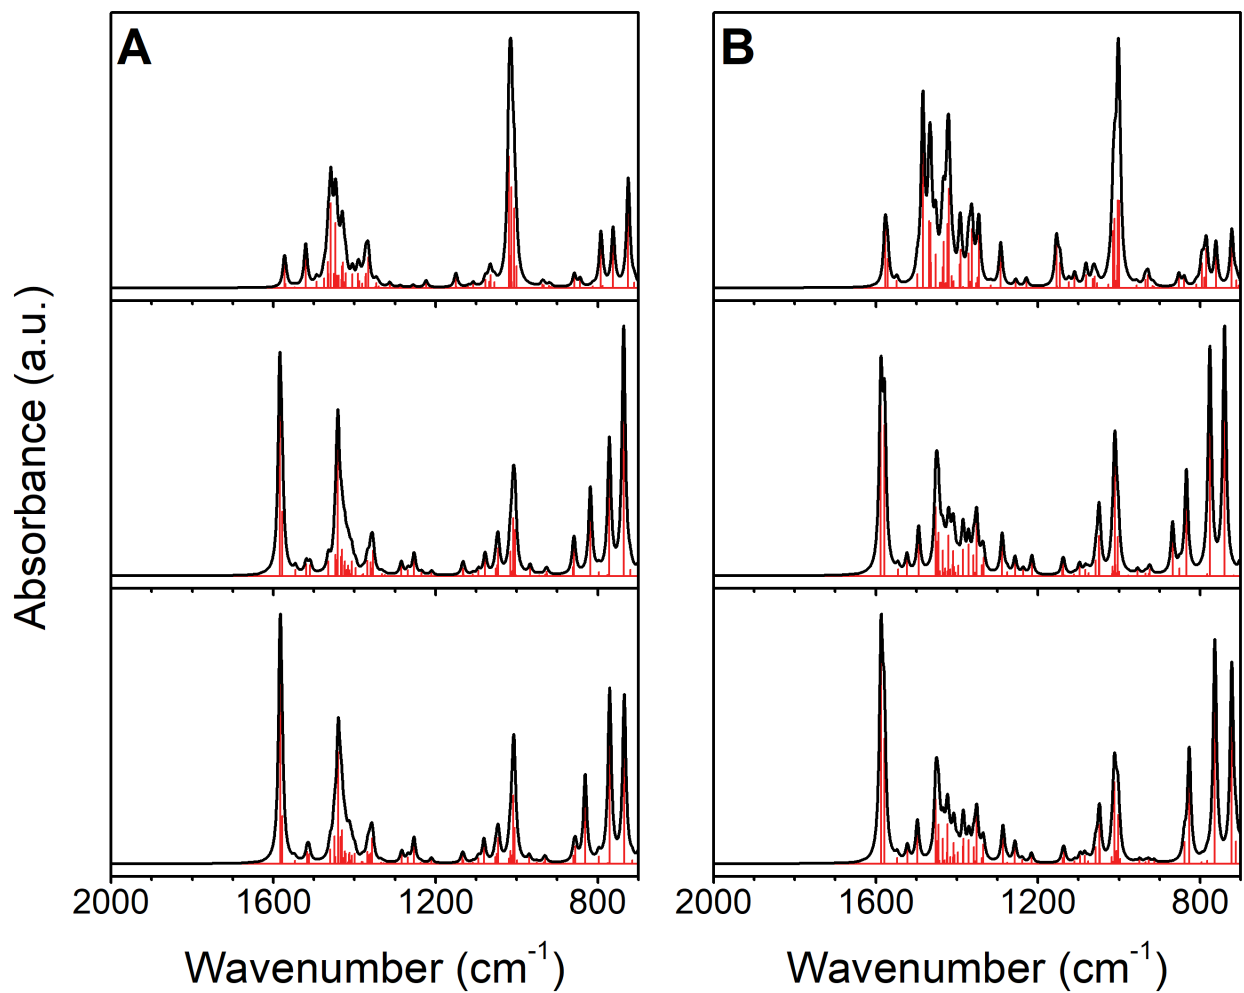

Figure S37. DFT calculated FTIR spectra of **C2** attached to Au in **A** the Cl down orientation using (Original Basis) (top), LAN (middle), and DEF (bottom) and **B** Cl up orientation using (Original Basis) (top), LAN (middle), and DEF (bottom).

## DFT Optimized Structure Parameters

Table S5. Orientational and energetic parameters of the PBE D3 LANL2DZ DFT optimized structures of **C1m** and **C2m**.

| Structure | Cl orientation | Tilt angles |            | Twist Angle | Relative Energy | S-Au (Å) |
|-----------|----------------|-------------|------------|-------------|-----------------|----------|
|           |                | $\theta_1$  | $\theta_2$ | $\psi_1$    |                 |          |
| C1m       | Up             | 71          | 14         | 92          | 2.75            | 2.32     |
|           | Down           | 73          | 48         | 265         | 0               | 2.32     |
| C2m       | Up             | 69          | 20         | 92          | 0               | 2.25     |
|           | Down           | 74          | 68         | 267         | 1.84            | 2.32     |

Table S6. Orientational and energetic parameters of the wB97XD LANL2DZ optimized structures of **C1m** and **C2m**.

| Structure | Cl orientation | Tilt angles |            | Twist Angle | Relative Energy | S-Au (Å) |
|-----------|----------------|-------------|------------|-------------|-----------------|----------|
|           |                | $\theta_1$  | $\theta_2$ | $\psi_1$    |                 |          |
| C1m       | Up             | 74          | 75         | 91          | 0.72            | 2.34     |
|           | Down           | 76          | 23         | 268         | 0               | 2.40     |
| C2m       | Up             | 73          | 23         | 91          | 3.79            | 2.22     |
|           | Down           | 75          | 72         | 269         | 0               | 2.28     |

## Relative Intensity and Transition Dipole Analysis with Computed Orientations

### TDM analysis using Functional: PBE D3 Basis Set: LANL2DZ

Table S7. Experimentally determined TDM and the DFT (PBE-D3-LANL2DZ) calculated TDMs with respect to normal for orientation determination of the C1 monolayer on Au.

| Peak PM | PM-IRRAS Area | Peak Calc | Calc Area | $\theta$ ( $^{\circ}$ ) $\pm 6^{\circ}$ | Calculated Peak Cl down | Relative Intensity | TDM angle at peak Cl down | Calculated Peak Cl up | Relative Intensity | TDM angle Cl up | Transition (DFT)                                       |
|---------|---------------|-----------|-----------|-----------------------------------------|-------------------------|--------------------|---------------------------|-----------------------|--------------------|-----------------|--------------------------------------------------------|
| 1596    | 0.0745        | 1597      | 0.12849   | 40                                      | 1604                    | 1.2                | 57                        | 1606                  | 0.4                | 86              | bipyridine breathing modes                             |
|         |               |           |           |                                         | 1577                    | 4.6                | 22                        | 1582                  | 2.7                | 56              | bipyridine breathing modes                             |
| 1488    | 0.02344       | 1486      | 0.02757   | 23                                      | 1480                    | 15.6               | 32                        | 1481                  | 1.0                | 79              | C-H bending (bipyridine, Cp*)                          |
|         |               |           |           |                                         | 1478                    | 16.4               | 86                        |                       |                    |                 | C-H bending (bipyridine, Cp*)                          |
| 1466    | 0.02734       | 1464      | 0.08584   | 56                                      | 1470                    | 4.5                | 88                        | 1471                  | 41.8               | 12              | C-H bending (Cp*)                                      |
|         |               |           |           |                                         | 1465                    | 58.9               | 89                        | 1470                  | 18.5               | 41              | C-H bending (Cp*)                                      |
|         |               |           |           |                                         | 1460                    | 3.3                | 20                        | 1458                  | 4.0                | 72              | C-H bending (Cp*)                                      |
|         |               |           |           |                                         | 1449                    | 7.8                | 10                        | 1455                  | 12.5               | 62              | C-H bending (Cp*)                                      |
|         |               |           |           |                                         | 1445                    | 4.3                | 28                        |                       |                    |                 | C-H bending (bipyridine, Cp*)                          |
|         |               |           |           |                                         | 1444                    | 6.3                | 59                        | 1432                  | 5.8                | 29              | C-H bending (bipyridine, Cp*)                          |
| 1441    | 3.74E-02      | 1435      | 0.05767   | 36                                      | 1436                    | 3.9                | 48                        | 1433                  | 4.8                | 67              | C-H bending (Cp*)                                      |
|         |               |           |           |                                         | 1422                    | 28.5               | 10                        | 1421                  | 9.5                | 45              | C-H bending (Cp*) Cp* breathing symmetric              |
|         |               |           |           |                                         | 1417                    | 10.2               | 26                        | 1419                  | 6.3                | 38              | C-H bending (Cp*) Cp* breathing symmetric              |
| 1390    | 0.0343        | 1391      | 0.05497   | 38                                      | 1393                    | 6.2                | 45                        | 1392                  | 5.0                | 33              | C-H bending (Cp*) Cp* breathing asymmetric             |
| 1318    | 0.00252       | 1320      | 0.00953   | 59                                      | 1315                    | 4.7                | 8                         | 1321                  | 0.3                | 77              | C-H bending, C-C breathing mix (bipyridine)            |
| 1229    | 0.00703       | 1237      | 0.01077   | 36                                      | N/A                     |                    | N/A                       | N/A                   |                    | N/A             | N/A                                                    |
| 1110    | 0.01121       | 1110      | 0.01266   | 20                                      | 1106                    | 1.8                | 44                        | 1107                  | 2.2                | 32              | asymmetric C-H bending, C-C breathing mix (bipyridine) |
| 1075    | 0.00276       | 1074      | 0.02314   | 70                                      | 1068                    | 5.1                | 85                        | 1064                  | 24.5               | 17              | asymmetric C-H bending, C-C breathing mix (bipyridine) |
|         |               |           |           |                                         | 1067                    | 5.3                | 89                        | 1063                  | 3.6                | 45              | asymmetric C-H bending, C-C breathing mix (bipyridine) |
| 1027    | 0.01348       | 1031      | 0.05263   | 60                                      | 1015                    | 46.4               | 21                        | 1012                  | 14.6               | 36              | C-H bending (Cp*)                                      |
| 944     | 7.51E-04      | 940       | 0.00132   | 41                                      | 1002                    | 22.1               | 37                        | 1000                  | 40.5               | 24              | symmetric C-H bending (Cp*), Cp* vibration mix         |
|         |               |           |           |                                         |                         |                    |                           | 862                   | 6.9                | 42              | out of plane C-H bending, bpy                          |
| 839     | 0.00829       | 845       | 0.01142   | 32                                      | 853                     | 4.6                | 39                        | 857                   | 2.7                | 88              | out of plane C-H bending, bpy                          |
| 818     | 0.00624       | 813       | 0.02673   | 61                                      | 818                     | 2.3                | 14                        | 818                   | 0.7                | 90              | bpy breathing both bpps                                |



Table S8. Experimentally determined TDM and the DFT (PBE-D3-LANL2DZ) calculated TDMs with respect to normal for orientation determination of the C2 monolayer on Au.

| Peak PM-IRRAS | PM-IRRAS Area | Peak Calc | Calc Area | $\theta$ ( $^{\circ}$ ) $\pm 6^{\circ}$ | Calculated Peak Cl down | Relative Intensity | TDM angle at peak Cl down | Calculated Peak Cl up | Relative Intensity | TDM angle Cl up | Transition (DFT)                                           |
|---------------|---------------|-----------|-----------|-----------------------------------------|-------------------------|--------------------|---------------------------|-----------------------|--------------------|-----------------|------------------------------------------------------------|
| 1589          | 0.02207       | 1587      | 0.09567   | 61                                      | 1572                    | 12.2               | 50                        | 1577                  | 23.0               | 57              | phenylpyridine breathing modes                             |
|               |               |           |           |                                         | 1569                    | 1.8                | 9                         | 1571                  | 11.7               | 10              | phenylpyridine breathing modes                             |
| 1526          | 0.00693       | 1525      | 0.00703   | 7                                       | 1520                    | 18.0               | 70                        | 1548                  | 3.0                | 61              | phenylpyridine breathing mode                              |
| 1476          | 6.04E-03      | 1465      | 0.03572   | 66                                      | 1475                    | 4.3                | 68                        | 1484                  | 70.0               | 15              | C-H bend (Cp*) and Cp* breathing                           |
| 1448          | 4.84E-04      | 1451      | 0.03455   | 83                                      | 1465                    | 11.2               | 16                        | 1468                  | 26.3               | 47              | C-H bend (Cp*)                                             |
|               |               |           |           |                                         | 1464                    | 6.0                | 47                        | 1465                  | 25.4               | 17              | C-H bend (Cp*)                                             |
|               |               |           |           |                                         | 1458                    | 36.4               | 38                        | 1464                  | 9.9                | 7               | C-H bend (Cp*, ppy)                                        |
|               |               |           |           |                                         | 1451                    | 6.3                | 75                        | 1453                  | 13.3               | 80              | C-H bend (Cp*)                                             |
|               |               |           |           |                                         | 1446                    | 27.8               | 25                        | 1452                  | 7.3                | 41              | C-H bend (Cp*)                                             |
|               |               |           |           |                                         | 1443                    | 5.4                | 49                        | 1441                  | 2.3                | 66              | C-H bend (Cp*)                                             |
|               |               |           |           |                                         | 1439                    | 5.4                | 51                        |                       |                    |                 | C-H bend (Cp*)                                             |
|               |               |           |           |                                         | 1435                    | 0.3                | 35                        |                       |                    |                 | C-H bend (Cp*)                                             |
| 1431          | 7.95E-04      | 1428      | 0.00693   | 70                                      | 1432                    | 3.8                | 23                        | 1434                  | 8.2                | 42              | C-H bend (Cp*, phenylpyridine)                             |
|               |               |           |           |                                         | 1431                    | 9.5                | 35                        | 1433                  | 18.1               | 15              | C-H bend (Cp*, phenylpyridine)                             |
|               |               |           |           |                                         | 1429                    | 11.1               | 37                        | 1427                  | 2.1                | 80              | C-H bend (Cp*, phenylpyridine)                             |
|               |               |           |           |                                         |                         |                    |                           | 1425                  | 2.1                | 89              | C-H bend (Cp*, phenylpyridine)                             |
|               |               |           |           |                                         |                         |                    |                           | 1423                  | 25.2               | 32              | C-H bend (Cp*, phenylpyridine)                             |
|               |               |           |           |                                         |                         |                    |                           | 1420                  | 39.0               | 17              | C-H bend (Cp*)                                             |
| 1395          | 0.01445       | 1390      | 0.02209   | 36                                      | 1391                    | 6.2                | 26                        | 1393                  | 9.4                | 23              | Cp* breathing, C-H bending (Cp*)                           |
|               |               |           |           |                                         | 1388                    | 3.0                | 44                        | 1391                  | 15.1               | 37              | Cp* breathing, C-H bending (Cp*)                           |
| 1370          | 1.34E-03      | 1371      | 0.00323   | 50                                      | 1380                    | 2.1                | 82                        | 1371                  | 13.7               | 58              | C-H bending symmetric (Cp*)                                |
|               |               |           |           |                                         |                         |                    |                           | 1346                  | 21.1               | 28              | C-H bending asymmetric (ppy)                               |
| 1300          | 6.12E-04      | 1299      | 0.0046    | 69                                      | 1313                    | 2.0                | 28                        | 1316                  | 1.1                | 90              | C-H bending asymmetric (ppy), phenylpyridine breathing mix |
|               |               |           |           |                                         |                         |                    |                           | 1292                  | 17.0               | 19              | C-H bending asymmetric (ppy)                               |
| 1227          | 0.00115       | 1232      | 0.00284   | 50                                      | 1223                    | 3.0                | 22                        | 1255                  | 2.7                | 44              | C-H bending asymmetric (ppy)                               |
| 1186          | 3.61E-04      | 1193      | 0.00187   | 64                                      | N/A                     |                    | N/A                       |                       |                    |                 | C-H bending asymmetric (ppy, Cp*)                          |
| 1158          | 1.17E-03      | 1159      | 0.00535   | 62                                      | 1150                    | 5.2                | 44                        | 1154                  | 17.6               | 21              | C-H bending asymmetric (ppy, Cp*)                          |
| 1104          | 9.75E-03      | 1097      | 1.70E-02  | 41                                      | 1107                    | 1.9                | 43                        | 1110                  | 5.1                | 17              | C-H bending asymmetric (ppy)                               |
| 1053          | 1.23E-03      | 1060      | 1.72E-02  | 74                                      | 1064                    | 5.6                | 73                        | 1065                  | 3.6                | 47              | Methyl wagging (Cp*)                                       |
| 1028          | 7.03E-03      | 1031      | 0.04125   | 66                                      | 1019                    | 56.1               | 24                        | 1015                  | 22.3               | 30              | ppy breathing                                              |
|               |               |           |           |                                         | 1013                    | 43.2               | 83                        | 1011                  | 27.2               | 26              | Methyl wagging (Cp*), ppy breathing                        |
|               |               |           |           |                                         |                         |                    |                           | 999                   | 34.1               | 25              | C-H bending asymmetric (ppy), pyridine breathing           |
| 912           | 4.41E-04      | 913       | 0.00539   | 73                                      | 937                     | 1.6                | 39                        | 935                   | 3.4                | 2               | Methyl Wagging asymmetric                                  |
|               |               |           |           |                                         | 933                     | 1.3                | 50                        | 929                   | 5.1                | 16              | Methyl wagging (Cp*) asymmetric                            |

|            |          |     |         |    |            |     |    |            |     |    |                                     |
|------------|----------|-----|---------|----|------------|-----|----|------------|-----|----|-------------------------------------|
| <b>865</b> | 1.29E-03 | 870 | 0.00329 | 51 | <b>858</b> | 5.7 | 12 | <b>853</b> | 5.1 | 32 | C-H bending ppy out of plane        |
| <b>845</b> | 0.00761  | 845 | 0.02136 | 53 | <b>844</b> | 3.5 | 70 | <b>840</b> | 3.7 | 68 | C-H bending ppy out of plane        |
| <b>823</b> | 0.00314  | 838 | 0.01172 | 59 |            |     |    |            |     |    | C-H bending ppy out of plane        |
| <b>815</b> | 5.20E-04 | 814 | 0.02141 | 81 | <b>813</b> | 0.9 | 63 | <b>809</b> | 1.5 | 66 | pyridine and phenyl mixed breathing |

### TDM Analysis using Functional: wB97XD Basis Set: LANL2DZ

Table S9. Experimentally determined TDM and the DFT (wB97XD-LANL2DZ) calculated TDMs with respect to normal for orientation determination of the C1 monolayer on Au.

| Peak PM | PM-IRRAS Area | Peak Calc | Calc Area | $\theta$ ( $^{\circ}$ ) $\pm 6^{\circ}$ | Calculated Peak CI down (scaled by 0.9485) | Relative Intensity | TDM angle at peak CI down | Calculated Peak CI up (scaled by 0.9485) | Relative Intensity | TDM angle CI up | Transition (DFT)                           |
|---------|---------------|-----------|-----------|-----------------------------------------|--------------------------------------------|--------------------|---------------------------|------------------------------------------|--------------------|-----------------|--------------------------------------------|
| 1596    | 0.0745        | 1597      | 0.12849   | 40                                      | 1605                                       | 4.8                | 45                        | 1610                                     | 3.8                | 49              | bipyridine breathing mode                  |
|         |               |           |           |                                         | 1584                                       | 54.9               | 20                        | 1593                                     | 60.4               | 19              | bipyridine breathing mode                  |
|         |               |           |           |                                         | 1568                                       | 30.2               | 32                        | 1572                                     | 13.1               | 17              | bipyridine breathing modes                 |
|         |               |           |           |                                         | 1515                                       | 5.4                | 28                        | 1529                                     | 8.4                | 34              | bipyridine breathing modes                 |
| 1488    | 0.02344       | 1486      | 0.02757   | 23                                      |                                            |                    |                           | 1472                                     | 3.4                | 45              | C-H bending (bipyridne, Cp*)               |
| 1466    | 0.02734       | 1464      | 0.08584   | 56                                      | 1469                                       | 10.8               | 43                        | 1465                                     | 24.9               | 25              | C-H bending (bipyridne, Cp*)               |
|         |               |           |           |                                         | 1468                                       | 19.6               | 57                        | 1457                                     | 29.0               | 21              | C-H bending (Cp*)                          |
|         |               |           |           |                                         | 1458                                       | 4.3                | 74                        | 1448                                     | 4.3                | 7               | C-H bending (Cp*)                          |
|         |               |           |           |                                         | 1448                                       | 7.4                | 41                        |                                          |                    |                 | C-H bending (Cp*) Cp* breathing asymmetric |
| 1441    | 3.74E-02      | 1435      | 0.05767   | 36                                      | 1443                                       | 51.3               | 19                        | 1442                                     | 6.4                | 10              | C-H bending (Cp*)                          |
|         |               |           |           |                                         | 1442                                       | 21.2               | 39                        | 1438                                     | 12.7               | 75              | C-H bending (Cp*)                          |
|         |               |           |           |                                         | 1437                                       | 11.4               | 40                        | 1412                                     | 6.8                | 46              | C-H bending (bipyridne, Cp*)               |
|         |               |           |           |                                         | 1427                                       | 6.7                | 65                        | 1407                                     | 4.0                | 53              | C-H bending (Cp*)                          |
|         |               |           |           |                                         | 1418                                       | 6.3                | 73                        |                                          |                    |                 | C-H bending (bipyridne, Cp*)               |
|         |               |           |           |                                         | 1405                                       | 6.3                | 21                        |                                          |                    |                 | C-H bending (Cp*)                          |
|         |               |           |           |                                         | 1404                                       | 16.6               | 40                        |                                          |                    |                 | C-H bending (Cp*) Cp* breathing symmetric  |
| 1390    | 0.0343        | 1391      | 0.05497   | 38                                      | 1395                                       | 4.8                | 86                        | 1392                                     | 3.0                | 85              | C-H bending (Cp*) Cp* breathing asymmetric |
|         |               |           |           |                                         | 1377                                       | 6.7                | 16                        | 1383                                     | 5.2                | 62              | C-H bending, C-C breathing mix (bipyridne) |
|         |               |           |           |                                         | 1362                                       | 9.6                | 79                        | 1380                                     | 6.7                | 39              | C-H bending (Cp*) Cp* breathing asymmetric |
|         |               |           |           |                                         | 1359                                       | 10.8               | 81                        | 1380                                     | 10.8               | 65              | C-H bending (Cp*) Cp* breathing asymmetric |
|         |               |           |           |                                         |                                            |                    |                           | 1361                                     | 5.5                | 67              | C-H bending (Cp*) Cp* breathing asymmetric |
|         |               |           |           |                                         |                                            |                    |                           | 1358                                     | 10.8               | 38              | C-H bending (Cp*) Cp* breathing asymmetric |
|         |               |           |           |                                         |                                            |                    |                           | 1351                                     | 21.7               | 28              | C-H bending (Cp*) Cp* breathing asymmetric |
|         |               |           |           |                                         |                                            |                    |                           | 1339                                     | 4.6                | 74              | C-H bending (Cp*) Cp* breathing asymmetric |
|         |               |           |           |                                         |                                            |                    |                           | 1338                                     | 3.0                | 57              | C-H bending (Cp*) Cp* breathing asymmetric |
| 1318    | 0.00252       | 1320      | 0.00953   | 59                                      | 1289                                       | 10.3               | 25                        | 1290                                     | 3.3                | 27              | C-H bending, C-C breathing mix (bipyridne) |
| 1229    | 0.00703       | 1237      | 0.01077   | 36                                      | 1255                                       | 10.7               | 19                        | 1260                                     | 4.6                | 16              | C-H bending, C-C breathing mix (bipyridne) |
|         |               |           |           |                                         | 1248                                       | 11.6               | 19                        | 1252                                     | 3.6                | 40              | C-H bending, C-C breathing mix (bipyridne) |
| 1110    | 0.01121       | 1110      | 0.01266   | 20                                      | 1109                                       | 2.4                | 38                        | 1112                                     | 0.8                | 27              | C-H bending, C-C breathing mix (bipyridne) |

|             |          |      |         |    |             |      |    |             |      |    |                                             |
|-------------|----------|------|---------|----|-------------|------|----|-------------|------|----|---------------------------------------------|
|             |          |      |         |    |             |      |    | <b>1094</b> | 1.9  | 57 | C-H bending, bpy breathing mix asymmetric   |
| <b>1075</b> | 0.00276  | 1074 | 0.02314 | 70 | <b>1078</b> | 24.4 | 9  | <b>1088</b> | 18.0 | 20 | C-H bending, C-C breathing mix (bipyridine) |
|             |          |      |         |    |             |      |    | <b>1074</b> | 0.8  | 34 | C-H Methyl wagging                          |
|             |          |      |         |    |             |      |    | <b>1056</b> | 8.0  | 24 | C-H Methyl wagging                          |
| <b>1027</b> | 0.01348  | 1031 | 0.05263 | 60 | <b>1028</b> | 5.5  | 23 | <b>1050</b> | 10.5 | 24 | C-H bending, C-C breathing mix (bipyridine) |
|             |          |      |         |    | <b>1012</b> | 25.5 | 21 | <b>1033</b> | 4.5  | 21 | C-H bending (bipyridine, Cp*)               |
|             |          |      |         |    | <b>1005</b> | 21.6 | 12 | <b>1010</b> | 5.9  | 66 | C-H Methyl wagging                          |
|             |          |      |         |    | <b>1002</b> | 5.1  | 60 | <b>1000</b> | 19.1 | 33 | C-H Methyl wagging                          |
|             |          |      |         |    | <b>1002</b> | 5.1  | 58 |             |      |    | C-H Methyl wagging                          |
|             |          |      |         | 60 | <b>1000</b> | 6.5  | 37 |             |      |    | C-H Methyl wagging bpy breathing mic        |
| <b>944</b>  | 7.51E-04 | 940  | 0.00132 | 41 | <b>942</b>  | 0.4  | 46 | <b>943</b>  | 0.5  | 63 | out of plane C-H bending, bpy               |
|             |          |      |         |    | <b>875</b>  | 6.3  | 73 | <b>873</b>  | 8.3  | 51 | out of plane C-H bending, bpy               |
| <b>839</b>  | 0.00829  | 845  | 0.01142 | 32 | <b>855</b>  | 6.2  | 47 | <b>817</b>  | 26.3 | 22 | out of plane C-H bending, bpy               |
| <b>818</b>  | 0.00624  | 813  | 0.02673 | 61 | <b>813</b>  | 39.2 | 17 | <b>807</b>  | 6.0  | 20 | out of plane C-H bending, bpy               |

Table S10. Experimentally determined TDM and the DFT (wB97XD LANL2DZ) calculated TDMs with respect to normal for orientation determination of the C2 monolayer on Au.

| Peak PM     | PM-IRRAS Area | Peak Simulated | Simulated Area | $\theta$ ( $^{\circ}$ ) $\pm 6^{\circ}$ | Calculated Peak Cl down (scaled by 0.9485) | Relative Intensity | TDM angle at peak Cl down | Calculated Peak Cl up (scaled by 0.9485) | Relative Intensity | TDM angle Cl up | Transition (DFT)                                           |
|-------------|---------------|----------------|----------------|-----------------------------------------|--------------------------------------------|--------------------|---------------------------|------------------------------------------|--------------------|-----------------|------------------------------------------------------------|
| <b>1589</b> | 0.02207       | 1587           | 0.09567        | 61                                      | <b>1582</b>                                | 75.3               | 27                        | <b>1587</b>                              | 57.1               | 32              | phenylpyridine breathing (pyridine)                        |
|             |               |                |                |                                         | <b>1578</b>                                | 24.9               | 29                        | <b>1578</b>                              | 47.3               | 30              | phenylpyridine breathing (phenyl)                          |
| <b>1526</b> | 0.00693       | 1525           | 0.00703        | 7                                       | <b>1514</b>                                | 4.7                | 87                        | <b>1523</b>                              | 5.7                | 83              | phenylpyridine breathing                                   |
| <b>1476</b> | 6.04E-03      | 1465           | 0.03572        | 66                                      | <b>1510</b>                                | 4.3                | 82                        | <b>1494</b>                              | 14.3               | 17              | C-H bend (Cp*) and Cp* breathing                           |
|             |               |                |                |                                         | <b>1463</b>                                | 5.7                | 60                        | <b>1452</b>                              | 21.5               | 36              | C-H bend (Cp*) and Cp* breathing                           |
| <b>1448</b> | 4.84E-04      | 1451           | 0.03455        | 83                                      | <b>1448</b>                                | 8.2                | 39                        | <b>1449</b>                              | 10.8               | 45              | C-H bending asymmetric (ppy), phenylpyridine breathing mix |
| <b>1431</b> | 7.95E-04      | 1428           | 0.00693        | 70                                      | <b>1446</b>                                | 6.2                | 88                        | <b>1445</b>                              | 13.6               | 8               | C-H bending, C-C breathing mix (phenylpyridine)            |
|             |               |                |                |                                         | <b>1440</b>                                | 50.5               | 31                        | <b>1435</b>                              | 8.1                | 81              | C-H bend (Cp*) and Cp* breathing                           |
|             |               |                |                |                                         | <b>1432</b>                                | 7.5                | 83                        | <b>1431</b>                              | 1.1                | 43              | C-H bending asymmetric (ppy), phenylpyridine breathing mix |
|             |               |                |                |                                         | <b>1429</b>                                | 10.3               | 29                        | <b>1421</b>                              | 12.7               | 50              | C-H bend (Cp*)                                             |
|             |               |                |                |                                         | <b>1424</b>                                | 5.7                | 78                        | <b>1409</b>                              | 7.9                | 51              | C-H bending, C-C breathing mix (phenylpyridine)            |
|             |               |                |                |                                         | <b>1405</b>                                | 5.7                | 58                        |                                          |                    |                 | C-H bend (Cp*)                                             |
| <b>1395</b> | 0.01445       | 1390           | 0.02209        | 36                                      | <b>1399</b>                                | 3.1                | 90                        | <b>1397</b>                              | 3.3                | 88              | C-H bend (Cp*)                                             |
|             |               |                |                |                                         |                                            |                    |                           | <b>1385</b>                              | 8.4                | 22              | C-H bend (Cp*)                                             |
|             |               |                |                |                                         |                                            |                    |                           | <b>1384</b>                              | 5.6                | 81              | C-H bend (Cp*)                                             |
| <b>1370</b> | 1.34E-03      | 1371           | 0.00323        | 50                                      | <b>1367</b>                                | 5.9                | 36                        | <b>1371</b>                              | 9.9                | 32              | C-H bending, C-C breathing mix (phenylpyridine)            |
|             |               |                |                |                                         | <b>1360</b>                                | 5.4                | 87                        | <b>1359</b>                              | 6.5                | 48              | C-H bend (Cp*)                                             |
|             |               |                |                |                                         | <b>1354</b>                                | 9.9                | 88                        | <b>1351</b>                              | 16.4               | 41              | C-H bend (Cp*)                                             |

|             |          |      |          |    |             |      |    |             |      |    |                                                       |
|-------------|----------|------|----------|----|-------------|------|----|-------------|------|----|-------------------------------------------------------|
|             |          |      |          |    |             |      |    | <b>1334</b> | 5.8  | 65 | C-H bend (Cp*)                                        |
| <b>1300</b> | 6.12E-04 | 1299 | 0.0046   | 69 | <b>1285</b> | 5.0  | 66 | <b>1288</b> | 12.7 | 53 | C-H bending, C-C breathing mix (phenylpyridine)       |
| <b>1227</b> | 0.00115  | 1232 | 0.00284  | 50 | <b>1254</b> | 8.4  | 30 | <b>1256</b> | 5.4  | 38 | C-H bending, C-C breathing mix (phenylpyridine)       |
| <b>1186</b> | 3.61E-04 | 1193 | 0.00187  | 64 | <b>1209</b> | 1.8  | 56 | <b>1215</b> | 6.1  | 32 | C-H bending, C-C breathing mix (phenylpyridine)       |
| <b>1158</b> | 1.17E-03 | 1159 | 0.00535  | 62 | <b>1134</b> | 2.9  | 53 | <b>1140</b> | 1.8  | 31 | C-H bending (Cp*, ppy), C-C breathing mix (Cp*)       |
| <b>1104</b> | 9.75E-03 | 1097 | 1.70E-02 | 41 | <b>1108</b> | 0.7  | 88 | <b>1097</b> | 3.3  | 4  | C-H bending, C-C breathing mix (phenylpyridine)       |
|             |          |      |          |    | <b>1095</b> | 2.1  | 24 |             |      |    | C-H bending, C-C breathing mix (phenylpyridine)       |
| <b>1053</b> | 1.23E-03 | 1060 | 1.72E-02 | 74 | <b>1077</b> | 8.1  | 6  | <b>1057</b> | 5.0  | 27 | Methyl Wagging asymmetric                             |
|             |          |      |          |    | <b>1051</b> | 3.1  | 68 | <b>1050</b> | 12.5 | 25 | Methyl Wagging asymmetric                             |
|             |          |      |          |    | <b>1048</b> | 4.3  | 60 | <b>1048</b> | 8.9  | 18 | C-H bending, C-C breathing mix (phenylpyridine)       |
|             |          |      |          |    | <b>1046</b> | 10.7 | 26 |             |      |    | Methyl Wagging asymmetric                             |
| <b>1028</b> | 7.03E-03 | 1031 | 0.04125  | 66 | <b>1015</b> | 9.6  | 28 | <b>1017</b> | 0.8  | 64 | Methyl Wagging asymmetric                             |
|             |          |      |          |    | <b>1008</b> | 22.2 | 35 | <b>1016</b> | 3.1  | 18 | C-H bending (Cp*), C-C breathing mix (phenylpyridine) |
|             |          |      |          |    | <b>1002</b> | 17.8 | 19 | <b>1010</b> | 34.4 | 28 | C-H bending (Cp*), C-C breathing mix (phenylpyridine) |
|             |          |      |          |    |             |      |    | <b>1003</b> | 12.3 | 29 | Methyl Wagging asymmetric                             |
| <b>912</b>  | 4.41E-04 | 913  | 0.00539  | 73 | <b>926</b>  | 1.7  | 38 | <b>924</b>  | 2.1  | 69 | out of plane C-H bending, ppy                         |
| <b>865</b>  | 1.29E-03 | 870  | 0.00329  | 51 | <b>862</b>  | 11.6 | 62 | <b>868</b>  | 15.8 | 38 | out of plane C-H bending, ppy                         |
| <b>845</b>  | 0.00761  | 845  | 0.02136  | 53 |             |      |    | <b>851</b>  | 2.4  | 54 | out of plane C-H bending, ppy                         |
| <b>823</b>  | 0.00314  | 838  | 0.01172  | 59 |             |      |    |             |      |    | out of plane C-H bending, ppy                         |
| <b>815</b>  | 5.20E-04 | 814  | 0.02141  | 81 | <b>811</b>  | 33.0 | 15 | <b>834</b>  | 32.1 | 14 | out of plane C-H bending, ppy                         |

## TDM analysis using the wB97XD functional and the DEF2SVP basis set

Table S11. Experimentally determined TDM and the DFT (wB97XD functional and the DEF2SVP basis set) calculated TDMs with respect to normal for orientation determination of the C1 monolayer on Au used in final determination of the orientation of C1m on the surface.

| Peak PM     | PM-IRRAS Area | Peak Calc | Calc Area | $\theta$ ( $^{\circ}$ ) $\pm 6^{\circ}$ | Calculated Peak CI down (scaled by 0.9485) | Relative Intensity | TDM angle at peak CI down | Calculated Peak CI up (scaled by 0.9485) | Relative Intensity | TDM angle CI up | Transition (DFT)                                                  |     |    |                                                    |
|-------------|---------------|-----------|-----------|-----------------------------------------|--------------------------------------------|--------------------|---------------------------|------------------------------------------|--------------------|-----------------|-------------------------------------------------------------------|-----|----|----------------------------------------------------|
| <b>1596</b> | 0.0745        | 1597      | 0.12849   | 40                                      | <b>1605</b>                                | 5.9                | 48                        | <b>1609</b>                              | 4.6                | 50              | bipyridine breathing modes                                        |     |    |                                                    |
|             |               |           |           |                                         | <b>1583</b>                                | 56.7               | 20                        | <b>1591</b>                              | 69.2               | 16              | bipyridine breathing modes                                        |     |    |                                                    |
|             |               |           |           |                                         | <b>1567</b>                                | 39.4               | 32                        | <b>1572</b>                              | 18.5               | 17              | bipyridine breathing modes                                        |     |    |                                                    |
|             |               |           |           |                                         | <b>1512</b>                                | 5.7                | 29                        | <b>1526</b>                              | 9.1                | 34              | bipyridine breathing modes                                        |     |    |                                                    |
| <b>1488</b> | 0.02344       | 1486      | 0.02757   | 23                                      | <b>1471</b>                                | 10.9               | 63                        | <b>1472</b>                              | 5.1                | 40              | C-H bending (bipyridine, Cp*)                                     |     |    |                                                    |
| <b>1466</b> | 0.02734       | 1464      | 0.08584   | 56                                      | <b>1468</b>                                | 21.8               | 42                        |                                          |                    |                 | C-H bending (bipyridine, Cp*)                                     |     |    |                                                    |
|             |               |           |           |                                         | <b>1443</b>                                | 66.1               | 18                        | <b>1465</b>                              | 31.8               | 16              | C-H bending (Cp*)                                                 |     |    |                                                    |
|             |               |           |           |                                         | <b>1441</b>                                | 8.8                | 46                        | <b>1458</b>                              | 19.0               | 33              | C-H bending (Cp*)                                                 |     |    |                                                    |
|             |               |           |           |                                         |                                            |                    |                           | <b>1442</b>                              | 7.7                | 6               | C-H bending (bipyridine, Cp*)                                     |     |    |                                                    |
|             |               |           |           |                                         |                                            |                    |                           | <b>1438</b>                              | 14.0               | 70              | C-H bending (Cp*)                                                 |     |    |                                                    |
| <b>1441</b> | 3.74E-02      | 1435      | 0.05767   | 36                                      | <b>1436</b>                                | 14.0               | 39                        |                                          |                    |                 | C-H bending (bipyridine, Cp*)                                     |     |    |                                                    |
|             |               |           |           |                                         | <b>1427</b>                                | 7.5                | 62                        | <b>1415</b>                              | 7.9                | 48              | C-H bending (Cp*)                                                 |     |    |                                                    |
|             |               |           |           |                                         | <b>1419</b>                                | 7.2                | 80                        |                                          |                    |                 | C-H bending (bipyridine, Cp*)                                     |     |    |                                                    |
| <b>1390</b> | 0.0343        | 1391      | 0.05497   | 38                                      | <b>1406</b>                                | 5.4                | 54                        | <b>1384</b>                              | 4.8                | 83              | C-H bending (Cp*) Cp* breathing asymmetric                        |     |    |                                                    |
|             |               |           |           |                                         | <b>1404</b>                                | 15.2               | 30                        | <b>1381</b>                              | 6.1                | 52              | C-H bending (Cp*) Cp* breathing symmetric                         |     |    |                                                    |
|             |               |           |           |                                         | <b>1396</b>                                | 5.3                | 84                        |                                          |                    |                 | C-H bending (Cp*) Cp* breathing symmetric                         |     |    |                                                    |
|             |               |           |           |                                         |                                            |                    |                           | <b>1379</b>                              | 7.8                | 49              | C-H bending, C-C breathing mix (bipyridine)                       |     |    |                                                    |
| <b>1318</b> | 0.00252       | 1320      | 0.00953   | 59                                      | <b>1362</b>                                | 10.6               | 75                        | <b>1361</b>                              | 5.6                | 64              | C-H bending (Cp*) Cp* breathing symmetric                         |     |    |                                                    |
|             |               |           |           |                                         | <b>1359</b>                                | 9.8                | 80                        | <b>1358</b>                              | 11.0               | 37              | C-H bending (Cp*) Cp* breathing asymmetric                        |     |    |                                                    |
|             |               |           |           |                                         |                                            |                    |                           | <b>1352</b>                              | 19.3               | 31              | C-H bending (Cp*) Cp* breathing asymmetric                        |     |    |                                                    |
| <b>1229</b> | 0.00703       | 1237      | 0.01077   | 36                                      | <b>1288</b>                                | 11.1               | 25                        | <b>1253</b>                              | 9.8                | 29              | C-H bending, C-C breathing mix (bipyridine)                       |     |    |                                                    |
|             |               |           |           |                                         | <b>1256</b>                                | 14.5               | 18                        |                                          |                    |                 | C-H bending, C-C breathing mix (bipyridine)                       |     |    |                                                    |
|             |               |           |           |                                         | <b>1247</b>                                | 12.2               | 20                        |                                          |                    |                 | C-H bending, C-C breathing mix (bipyridine)                       |     |    |                                                    |
| <b>1110</b> | 0.01121       | 1110      | 0.01266   | 20                                      | <b>1110</b>                                | 3.3                | 37                        | <b>1095</b>                              | 7.2                | 30              | asymmetric C-H bending, C-C breathing mix (bipyridine)            |     |    |                                                    |
|             |               |           |           |                                         |                                            |                    |                           | <b>1090</b>                              | 17.0               | 16              | asymmetric C-H bending, C-C breathing mix (bipyridine)            |     |    |                                                    |
| <b>1075</b> | 0.00276       | 1074      | 0.02314   | 70                                      | <b>1079</b>                                | 28.9               | 14                        | <b>1053</b>                              | 10.4               | 19              | asymmetric C-H bending (Cp*, bpy), C-C breathing mix (bipyridine) |     |    |                                                    |
|             |               |           |           |                                         |                                            |                    |                           | <b>1048</b>                              | 7.2                | 30              | asymmetric C-H bending (Cp*, bpy), C-C breathing mix (bipyridine) |     |    |                                                    |
| <b>1027</b> | 0.01348       | 1031      | 0.05263   | 60                                      | <b>1028</b>                                | 7.0                | 27                        | <b>1032</b>                              | 5.5                | 15              | asymmetric C-H bending, C-C breathing mix (bipyridine)            |     |    |                                                    |
|             |               |           |           |                                         |                                            |                    |                           | <b>1011</b>                              | 24.7               | 20              | <b>1007</b>                                                       | 6.2 | 45 | C-H bending (Cp*) Cp* and bpy breathing asymmetric |
|             |               |           |           |                                         |                                            |                    |                           | <b>1009</b>                              | 7.3                | 35              | <b>1000</b>                                                       | 6.4 | 30 | C-H bending (Cp*) Cp* and bpy breathing asymmetric |

|            |          |     |         |    |             |      |    |             |      |    |                                                    |
|------------|----------|-----|---------|----|-------------|------|----|-------------|------|----|----------------------------------------------------|
|            |          |     |         |    | <b>1006</b> | 5.9  | 24 | <b>1000</b> | 13.0 | 37 | C-H bending (Cp*) Cp* and bpy breathing asymmetric |
|            |          |     |         |    | <b>1005</b> | 56.7 | 25 |             |      |    | C-H bending (Cp*) Cp* and bpy breathing asymmetric |
|            |          |     |         |    | <b>1003</b> | 39.4 | 76 |             |      |    | C-H bending (Cp*) Cp* and bpy breathing asymmetric |
| <b>944</b> | 7.51E-04 | 940 | 0.00132 | 41 | <b>999</b>  | 5.7  | 33 | <b>998</b>  | 7.8  | 9  | out of plane C-H bending bpy, bpy breathing mix    |
|            |          |     |         |    | <b>885</b>  | 10.9 | 65 | <b>865</b>  | 7.7  | 47 | out of plane C-H bending, bpy                      |
| <b>839</b> | 0.00829  | 845 | 0.01142 | 32 | <b>858</b>  | 21.8 | 16 | <b>818</b>  | 23.5 | 21 | out of plane C-H bending, bpy                      |
| <b>818</b> | 0.00624  | 813 | 0.02673 | 61 | <b>806</b>  | 66.1 | 22 | <b>808</b>  | 8.4  | 17 | out of plane C-H bending, bpy, bpy breathing mix   |

Table S12. Experimentally determined TDM and the DFT (wB97XD functional and the DEF2SVP basis set) calculated TDMs with respect to normal for orientation determination of the C2 monolayer on Au used in final determination of the orientation of C2m on the surface.

| Peak PM     | PM-IRRAS Area | Peak Calc | Calc Area | $\theta$ ( $^{\circ}$ ) $\pm 6^{\circ}$ | Calculated Peak Cl down (scaled by 0.9485) | Relative Intensity | TDM angle at peak Cl down | Calculated Peak Cl up (scaled by 0.9485) | Relative Intensity | TDM angle Cl up | Transition (DFT)                                           |
|-------------|---------------|-----------|-----------|-----------------------------------------|--------------------------------------------|--------------------|---------------------------|------------------------------------------|--------------------|-----------------|------------------------------------------------------------|
| <b>1589</b> | 0.02207       | 1587      | 0.09567   | 61                                      | <b>1581</b>                                | 88.2               | 27                        | <b>1587</b>                              | 68.7               | 31              | phenylpyridine breathing modes                             |
|             |               |           |           |                                         | <b>1578</b>                                | 13.9               | 37                        | <b>1579</b>                              | 40.6               | 36              | phenylpyridine breathing modes                             |
|             |               |           |           |                                         | <b>1513</b>                                | 4.7                | 85                        |                                          |                    |                 | phenylpyridine breathing mode                              |
| <b>1526</b> | 0.00693       | 1525      | 0.00703   | 7                                       | <b>1512</b>                                | 3.9                | 76                        | <b>1522</b>                              | 5.0                | 78              | C-H bend (Cp*) and Cp* breathing asymmetric                |
| <b>1476</b> | 6.04E-03      | 1465      | 0.03572   | 66                                      | <b>1460</b>                                | 5.6                | 45                        | <b>1497</b>                              | 13.2               | 16              | C-H bend (Cp*) and Cp* breathing asymmetric                |
| <b>1448</b> | 4.84E-04      | 1451      | 0.03455   | 83                                      | <b>1449</b>                                | 10.6               | 44                        | <b>1452</b>                              | 20.9               | 37              | C-H bend (Cp*) and Cp* breathing asymmetric                |
|             |               |           |           |                                         | <b>1440</b>                                | 42.7               | 32                        | <b>1449</b>                              | 7.5                | 50              | C-H bend (Cp*) and Cp* breathing asymmetric                |
|             |               |           |           |                                         | <b>1432</b>                                | 10.3               | 75                        | <b>1445</b>                              | 12.8               | 5               | C-H bend (Cp*)                                             |
| <b>1431</b> | 7.95E-04      | 1428      | 0.00693   | 70                                      | <b>1430</b>                                | 12.9               | 21                        | <b>1434</b>                              | 8.3                | 90              | C-H bend (Cp*)                                             |
|             |               |           |           |                                         | <b>1424</b>                                | 4.9                | 84                        | <b>1423</b>                              | 12.9               | 59              | C-H bend (Cp*, phenylpyridine)                             |
|             |               |           |           |                                         | <b>1414</b>                                | 3.7                | 42                        | <b>1408</b>                              | 6.8                | 59              | C-H bend (Cp*)                                             |
| <b>1395</b> | 0.01445       | 1390      | 0.02209   | 36                                      | <b>1412</b>                                | 4.4                | 72                        | <b>1397</b>                              | 3.8                | 88              | C-H bend (Cp*)                                             |
| <b>1370</b> | 1.34E-03      | 1371      | 0.00323   | 50                                      | <b>1367</b>                                | 4.7                | 38                        | <b>1384</b>                              | 5.8                | 46              | C-H bend (Cp*, phenylpyridine)                             |
|             |               |           |           |                                         | <b>1360</b>                                | 4.1                | 80                        | <b>1384</b>                              | 8.2                | 44              | phenylpyridine bending                                     |
|             |               |           |           |                                         | <b>1355</b>                                | 9.9                | 88                        | <b>1370</b>                              | 7.7                | 35              | C-H bend (Cp*, phenylpyridine)                             |
|             |               |           |           |                                         |                                            |                    |                           | <b>1358</b>                              | 5.5                | 55              | C-H bend (Cp*)                                             |
|             |               |           |           |                                         |                                            |                    |                           | <b>1351</b>                              | 15.1               | 38              | C-H bend (Cp*)                                             |
|             |               |           |           |                                         |                                            |                    |                           | <b>1334</b>                              | 6.3                | 66              | C-H bending asymmetric (ppy)                               |
| <b>1300</b> | 6.12E-04      | 1299      | 0.0046    | 69                                      | <b>1284</b>                                | 4.4                | 66                        | <b>1286</b>                              | 11.8               | 54              | C-H bending asymmetric (ppy), phenylpyridine breathing mix |
| <b>1227</b> | 0.00115       | 1232      | 0.00284   | 50                                      | <b>1252</b>                                | 9.7                | 29                        | <b>1257</b>                              | 6.8                | 38              | Methyl wagging (Cp*)                                       |
| <b>1186</b> | 3.61E-04      | 1193      | 0.00187   | 64                                      | <b>1209</b>                                | 2.0                | 19                        | <b>1216</b>                              | 3.2                | 40              | Methyl wagging (Cp*)                                       |
| <b>1158</b> | 1.17E-03      | 1159      | 0.00535   | 62                                      | <b>1134</b>                                | 2.8                | 50                        | <b>1136</b>                              | 3.9                | 51              | C-H bending asymmetric (ppy), phenylpyridine breathing mix |
| <b>1104</b> | 9.75E-03      | 1097      | 1.70E-02  | 41                                      | <b>1077</b>                                | 8.8                | 4                         | <b>1096</b>                              | 2.6                | 11              | C-H bending asymmetric (ppy), phenylpyridine breathing mix |
| <b>1053</b> | 1.23E-03      | 1060      | 1.72E-02  | 74                                      | <b>1049</b>                                | 3.9                | 75                        | <b>1058</b>                              | 5.5                | 23              | Methyl wagging (Cp*)                                       |
|             |               |           |           |                                         | <b>1045</b>                                | 10.1               | 24                        | <b>1049</b>                              | 12.7               | 26              | Methyl wagging (Cp*)                                       |

|             |          |      |         |    |             |      |    |             |      |    |                                                               |
|-------------|----------|------|---------|----|-------------|------|----|-------------|------|----|---------------------------------------------------------------|
|             |          |      |         |    |             |      |    | <b>1047</b> | 4.9  | 15 | C-H bend (Cp*)                                                |
| <b>1028</b> | 7.03E-03 | 1031 | 0.04125 | 66 | <b>1017</b> | 2.2  | 34 | <b>1011</b> | 26.4 | 30 | Methyl wagging (Cp*)                                          |
|             |          |      |         |    | <b>1014</b> | 5.0  | 15 | <b>1007</b> | 4.3  | 14 | C-H bending asymmetric (ppy),<br>phenylpyridine breathing mix |
|             |          |      |         |    | <b>1008</b> | 26.2 | 23 | <b>1002</b> | 15.9 | 26 | C-H bending asymmetric (ppy),<br>phenylpyridine breathing mix |
| <b>912</b>  | 4.41E-04 | 913  | 0.00539 | 73 | <b>1004</b> | 7.7  | 88 | <b>927</b>  | 1.2  | 65 | C-H bending asymmetric (ppy),<br>phenylpyridine breathing mix |
|             |          |      |         |    | <b>1003</b> | 13.8 | 17 |             |      |    | C-H bending asymmetric (ppy),<br>phenylpyridine breathing mix |
| <b>865</b>  | 1.29E-03 | 870  | 0.00329 | 51 | <b>857</b>  | 6.8  | 77 | <b>840</b>  | 0.2  | 69 | C-H bending ppy out of plane                                  |
| <b>845</b>  | 0.00761  | 845  | 0.02136 | 53 | <b>850</b>  | 33.1 | 13 | <b>839</b>  | 7.2  | 72 | C-H bending ppy out of plane                                  |
| <b>823</b>  | 0.00314  | 838  | 0.01172 | 59 | <b>797</b>  | 2.9  | 17 | <b>827</b>  | 36.1 | 11 | C-H bending Cp* out of plane                                  |
| <b>815</b>  | 5.20E-04 | 814  | 0.02141 | 81 | <b>771</b>  | 41.0 | 34 | <b>796</b>  | 0.6  | 42 | C-H bending ppy out of plane                                  |



## Visualizations of select IR modes

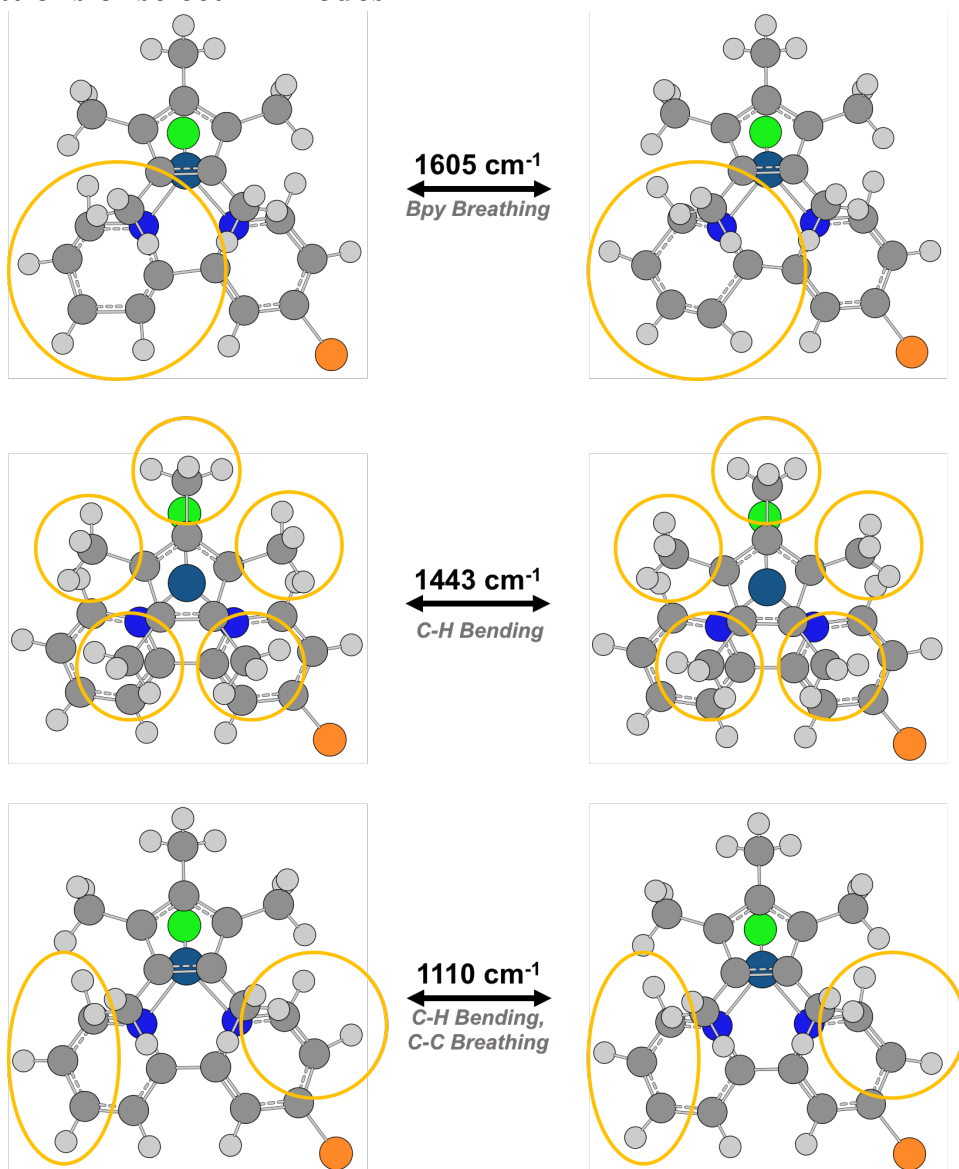

**Figure S38.** Visualization of displacements along key normal modes for **C1m** in the Cl down orientation (wB97XD functional and the DEF2SVP basis set with a 0.9485 scaling factor). Each mode is labeled with the corresponding vibrational frequency and a description; yellow circles are used to highlight areas of the molecule that have the largest displacements. All normal modes are reported in **Table S11**. Au atoms have been removed from the molecular structures for clarity.

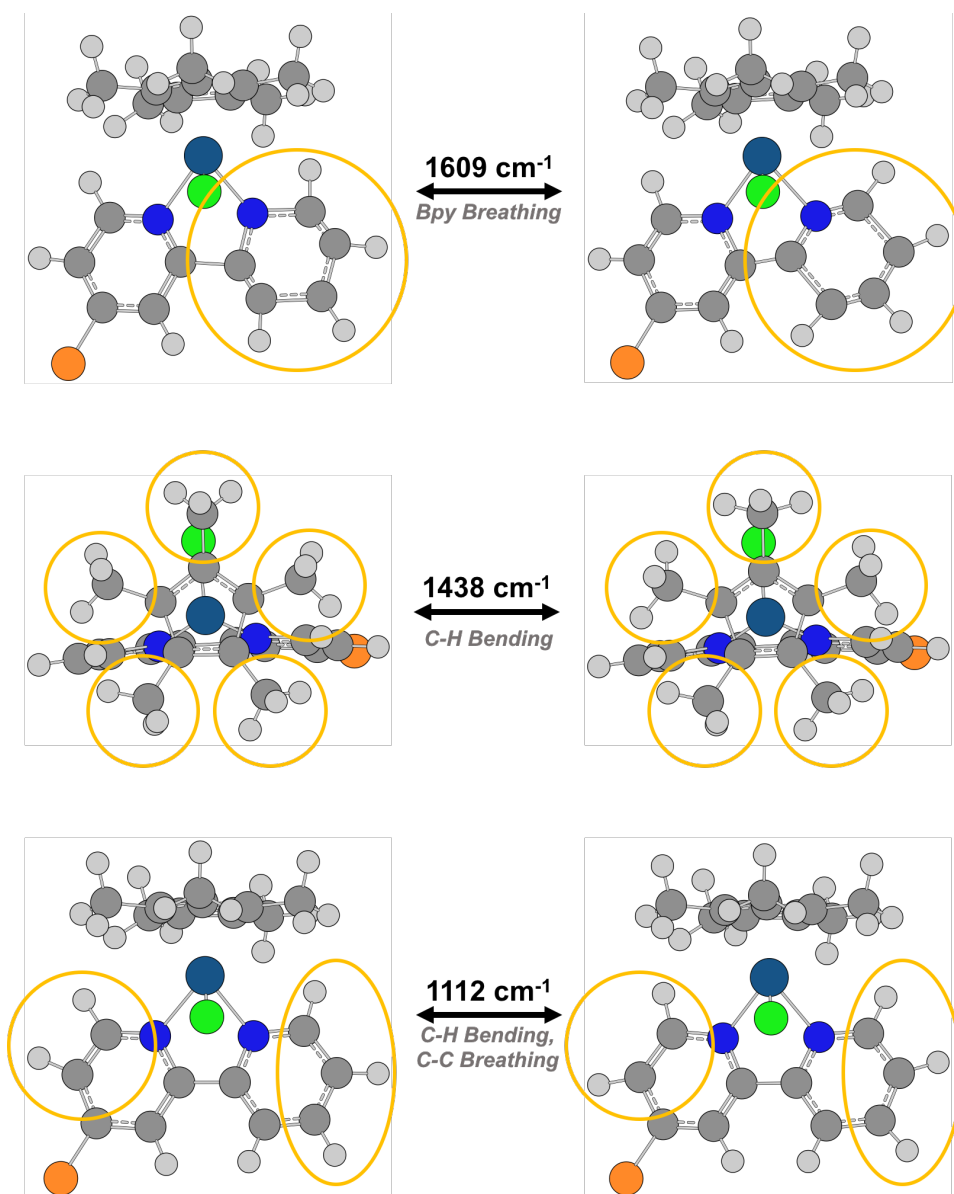

**Figure S39.** Visualization of displacements along key normal modes for **C1m** in the C1 up orientation (wB97XD functional and the DEF2SVP basis set with a 0.9485 scaling factor). Each mode is labeled with the corresponding vibrational frequency and a description; yellow circles are used to highlight areas of the molecule that have the largest displacements. All normal modes are reported in **Table S11**. Au atoms have been removed from the molecular structures for clarity.

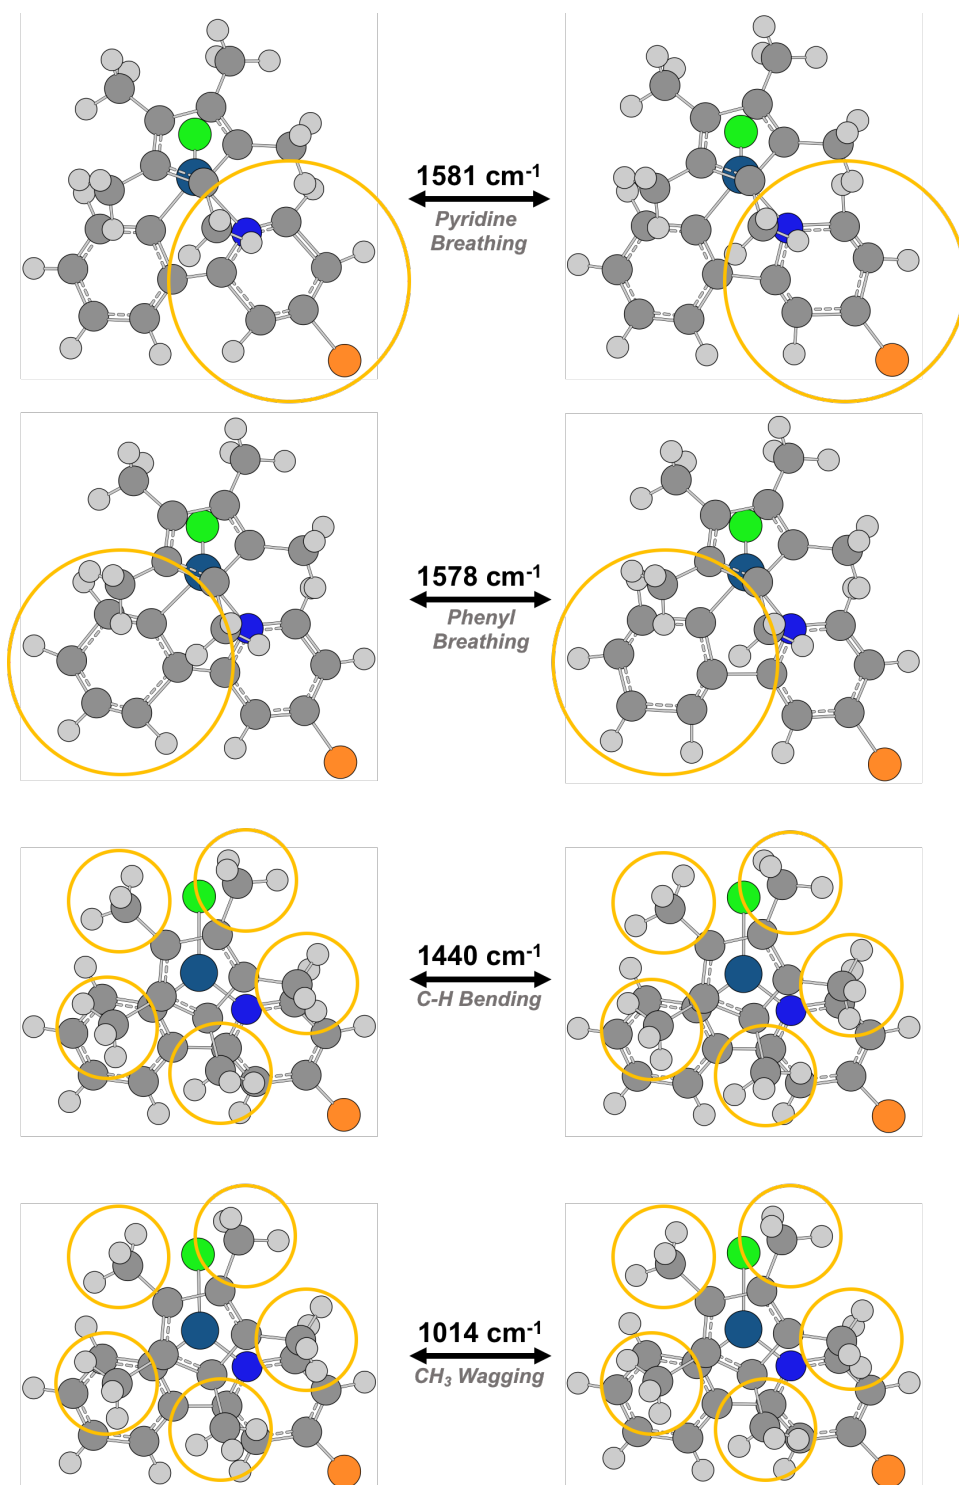

**Figure S40.** Visualization of displacements along key normal modes for **C2m** in the Cl down orientation (wB97XD functional and the DEF2SVP basis set with a 0.9485 scaling factor). Each mode is labeled with the corresponding vibrational frequency and a description; yellow circles are used to highlight areas of the molecule that have the largest displacements. All normal modes are reported in **Table S12**. Au atoms have been removed from the molecular structures for clarity.

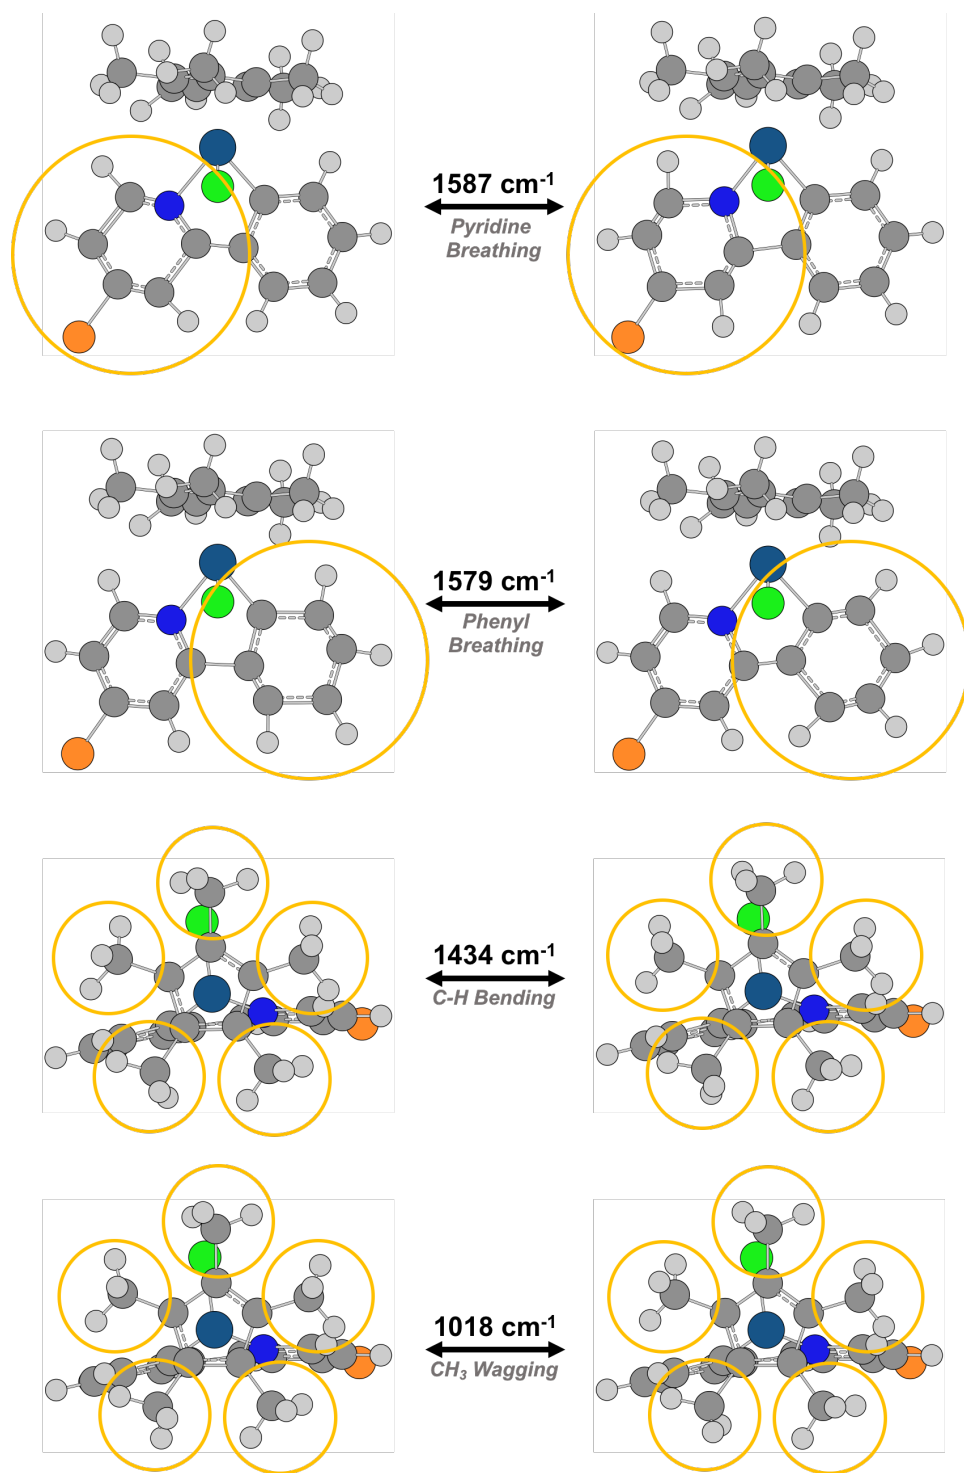

**Figure S41.** Visualization of displacements along key normal modes for **C2m** in the Cl up orientation (wB97XD functional and the DEF2SVP basis set with a 0.9485 scaling factor). Each mode is labeled with the corresponding vibrational frequency and a description; yellow circles are used to highlight areas of the molecule that have the largest displacements. All normal modes are reported in **Table S12**. Au atoms have been removed from the molecular structures for clarity.

## Crystallographic Data

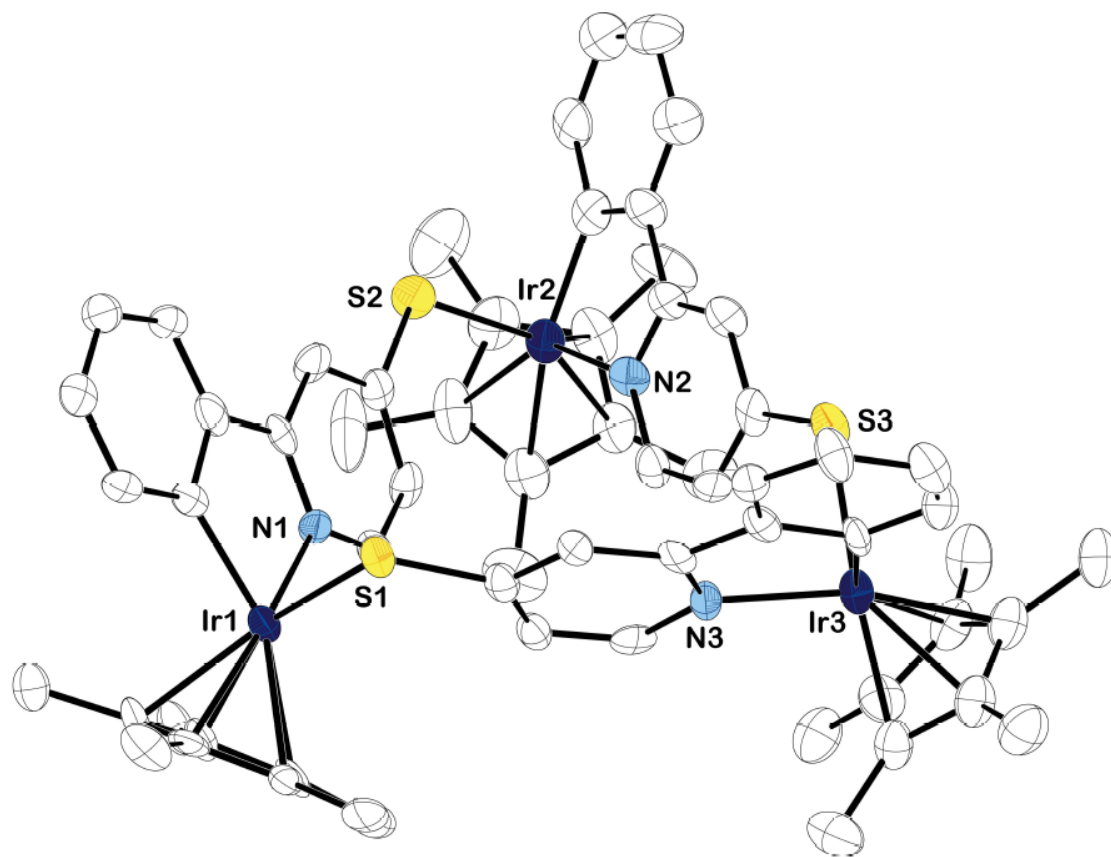

Figure S42. Solid-state structure of  $[\text{Cp}^*\text{Ir}(2\text{-phenylpyridine-4-thiol})]_3$  (**C3**) as determined by single-crystal X-ray diffraction. Thermal ellipsoids are set at the 50% probability level. Non-coordinating ortho-dichlorobenzene molecules and carbon bound hydrogens were omitted for clarity.

**Table S13.** Crystal data and structure refinement for complex **C3**

|                   |                                                                                                        |
|-------------------|--------------------------------------------------------------------------------------------------------|
| Empirical Formula | C <sub>85.66</sub> H <sub>81.11</sub> Cl <sub>7.46</sub> Ir <sub>3</sub> N <sub>3</sub> S <sub>3</sub> |
| Formula weight    | 2089.84                                                                                                |
| Temperature/K     | 100.0                                                                                                  |
| Crystal system    | monoclinic                                                                                             |
| Space group       | C2/c                                                                                                   |
| a/Å               | 45.563(8)                                                                                              |
| b/Å               | 18.693(3)                                                                                              |
| c/Å               | 21.023(4)                                                                                              |
| α/°               | 90                                                                                                     |
| β/°               | 90.978(4)                                                                                              |
| γ/°               | 90                                                                                                     |

---

|                                             |                                                                |
|---------------------------------------------|----------------------------------------------------------------|
| Volume/ Å <sup>3</sup>                      | 17902(5)                                                       |
| Z                                           | 8                                                              |
| ρ <sub>calc</sub> /cm <sup>3</sup>          | 1.551                                                          |
| μ/mm <sup>1</sup>                           | 4.784                                                          |
| F(000)                                      | 8175.0                                                         |
| Crystal size/mm <sup>3</sup>                | 0.3 × 0.1 × 0.1                                                |
| Radiation                                   | MoKα (λ = 0.71073)                                             |
| 2θ range for data collection/°              | 3.04 to 48.828                                                 |
| Index Ranges                                | -52 ≤ h ≤ 52, -21 ≤ k ≤ 21, -24 ≤ l ≤ 24                       |
| Reflections Collected                       | 104645                                                         |
| Independent reflections                     | 14729 [R <sub>int</sub> = 0.1623, R <sub>sigma</sub> = 0.1008] |
| Data/restraints/parameters                  | 14729/72/955                                                   |
| Goodness-of-fit on F <sup>2</sup>           | 1.027                                                          |
| Final R indexes [I ≥ 2σ(I)]                 | R <sub>1</sub> = 0.0491, wR <sub>2</sub> = 0.1018              |
| Final R indexes [all data]                  | R <sub>1</sub> = 0.0910, wR <sub>2</sub> = 0.116               |
| Largest diff. peak/hole / e Å <sup>-3</sup> | 2.33/-1.19                                                     |

---

**Notes on refinement.** For highly disordered ortho-dichlorobenzene molecules, the PLATON routine SQUEEZE was used to account for the corresponding electrons as a diffuse contribution to the overall scattering without specific atom positions.

# X-ray Photoelectron Spectroscopy

## C1m

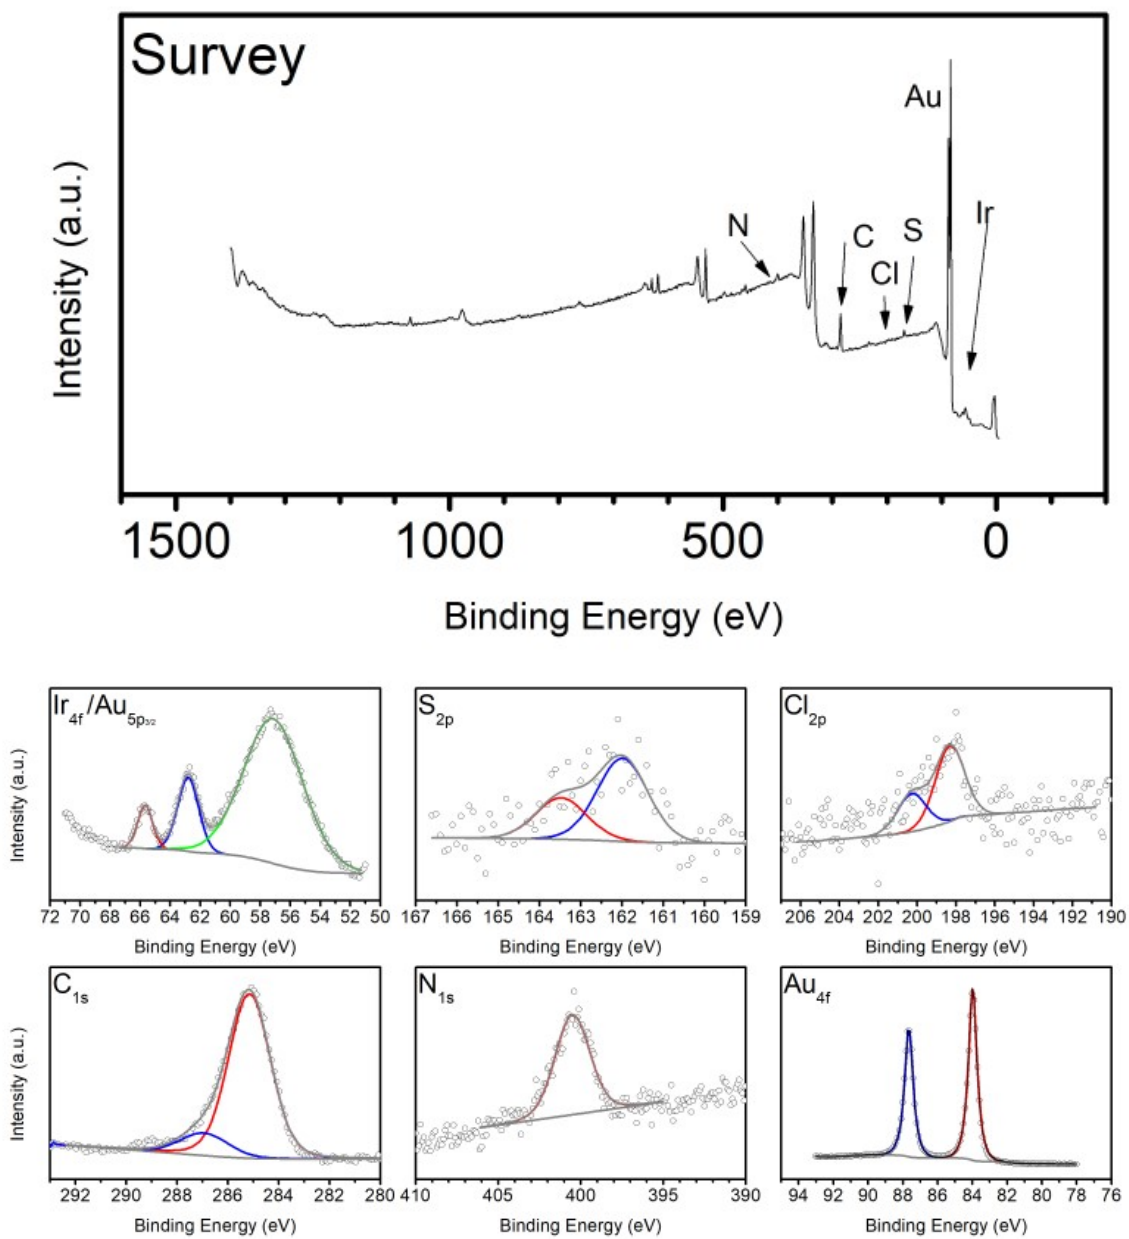

Figure S43. Survey (top) and high-resolution XPS of the **C1m** monolayer on Au. XPS peak positions of relevant elements (in eV) Ir (65.6, 62.7) S (163.5, 162.0), Cl (200.3, 198.3).

C2m

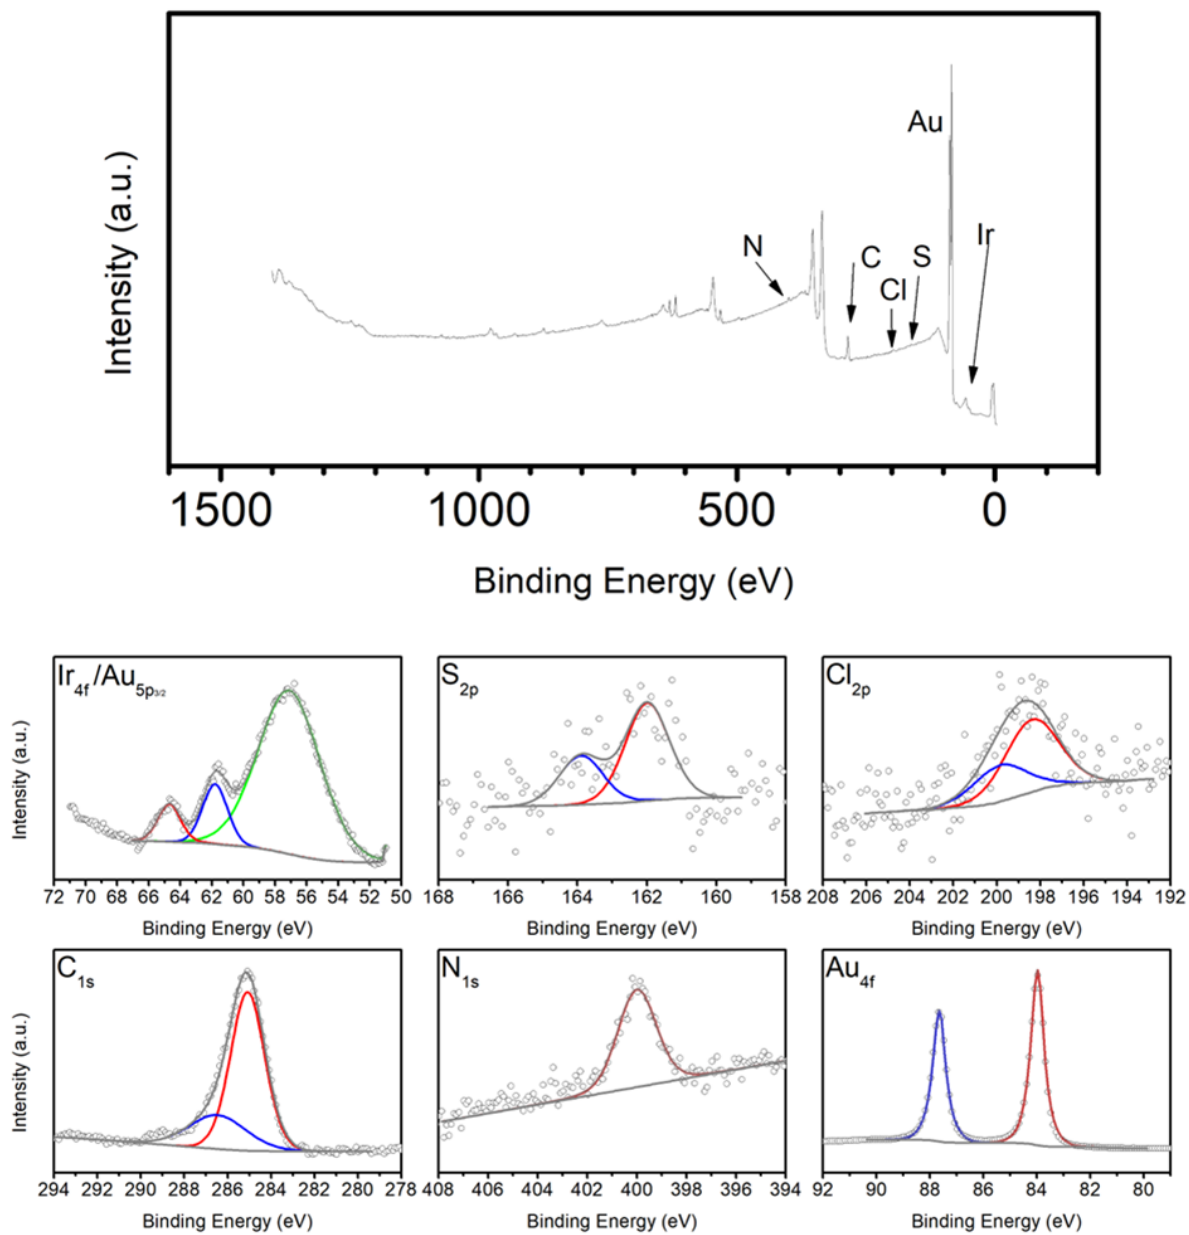

Figure S44. Survey (top) and high-resolution XPS of the C2m monolayer on Au. XPS peak positions of relevant elements (in eV) Ir (64.7, 61.8) S (163.9, 162.0), Cl (199.9, 198.4).



### Quantification of Cl and Ir for C1m

| Element | Peak              | % Concentration | Ratio          |
|---------|-------------------|-----------------|----------------|
| Ir      | 4f <sub>7/2</sub> | 19.82           | 1 Ir : 2.55 Cl |
| Ir      | 4f <sub>5/2</sub> | 8.27            |                |
| Cl      | 2p <sub>3/2</sub> | 47.94           |                |
| Cl      | 2p <sub>1/2</sub> | 23.96           |                |

The peaks of the high-resolution Ir 4f spectra for both **C1m** and **C2m** correspond to Ir being in the 3+ state. While there is overlap from Au 5d, there appears to be no lower energy Ir 4f signals, indicating that there is only Ir(III) with no Ir(I).

We believe the counter ion of **C1m** is serving as charge stabilization by ionic interactions similar to published reports.<sup>30-32</sup> Using the fitting analysis in CasaXPS and correcting for the relative sensitivity factors for each element, it was determined that there is about 1 Ir atom per 2.55 Cl. This demonstrates that the C1m monolayer co-packs with the Cl anion to balance the charges on the surface.

## DFT Optimized xyz coordinates (Functional: wB97XD Basis Set: DEF2SVP)

### DFT optimized xyz coordinates for C1m Cl down

|    |           |           |          |
|----|-----------|-----------|----------|
| Au | 0.000000  | 0.000000  | 0.000000 |
| Au | 2.899130  | 0.000000  | 0.000000 |
| Au | 5.798270  | 0.000000  | 0.000000 |
| Au | 1.449570  | 2.510720  | 0.000000 |
| Au | 4.348700  | 2.510720  | 0.000000 |
| Au | 7.247830  | 2.510720  | 0.000000 |
| Au | 2.899130  | 5.021450  | 0.000000 |
| Au | 5.798270  | 5.021450  | 0.000000 |
| Au | 8.697400  | 5.021450  | 0.000000 |
| Au | 4.348700  | 7.532170  | 0.000000 |
| Au | 7.247830  | 7.532170  | 0.000000 |
| Au | 10.146970 | 7.532170  | 0.000000 |
| Au | 5.798270  | 10.042890 | 0.000000 |
| Au | 8.697400  | 10.042890 | 0.000000 |
| Au | 11.596530 | 10.042890 | 0.000000 |
| Au | 7.247830  | 12.553620 | 0.000000 |
| Au | 10.146970 | 12.553620 | 0.000000 |
| Au | 13.046100 | 12.553620 | 0.000000 |
| Au | 8.697400  | 0.000000  | 0.000000 |
| Au | 11.596530 | 0.000000  | 0.000000 |
| Au | 14.495670 | 0.000000  | 0.000000 |
| Au | 10.146970 | 2.510720  | 0.000000 |
| Au | 13.046100 | 2.510720  | 0.000000 |
| Au | 15.945230 | 2.510720  | 0.000000 |
| Au | 11.596530 | 5.021450  | 0.000000 |
| Au | 14.495670 | 5.021450  | 0.000000 |
| Au | 17.394800 | 5.021450  | 0.000000 |
| Au | 13.046100 | 7.532170  | 0.000000 |
| Au | 15.945230 | 7.532170  | 0.000000 |
| Au | 18.844370 | 7.532170  | 0.000000 |
| Au | 14.495670 | 10.042890 | 0.000000 |
| Au | 17.394800 | 10.042890 | 0.000000 |
| Au | 20.293930 | 10.042890 | 0.000000 |
| Au | 15.945230 | 12.553620 | 0.000000 |
| Au | 18.844370 | 12.553620 | 0.000000 |
| N  | 9.900853  | 6.215612  | 3.592690 |
| C  | 11.122938 | 6.730078  | 3.400877 |
| C  | 12.213626 | 5.945674  | 3.070621 |
| C  | 12.059978 | 4.554474  | 2.914799 |
| C  | 10.755409 | 4.044077  | 3.076454 |
| C  | 9.708449  | 4.889198  | 3.390091 |

|    |           |           |          |
|----|-----------|-----------|----------|
| N  | 7.429833  | 5.490019  | 3.693331 |
| C  | 6.111406  | 5.294061  | 3.582057 |
| C  | 5.579468  | 4.040290  | 3.315948 |
| C  | 6.449962  | 2.966172  | 3.168039 |
| C  | 7.821979  | 3.190028  | 3.205946 |
| C  | 8.289399  | 4.476770  | 3.444601 |
| H  | 11.210066 | 7.805750  | 3.508481 |
| H  | 13.183262 | 6.405110  | 2.916384 |
| H  | 10.587599 | 2.985196  | 2.917695 |
| H  | 5.487784  | 6.171083  | 3.713760 |
| H  | 4.507302  | 3.916911  | 3.218556 |
| H  | 6.066710  | 1.969158  | 2.976539 |
| H  | 8.514065  | 2.377114  | 3.022564 |
| Ir | 8.327418  | 7.177412  | 4.628666 |
| C  | 7.915806  | 8.820565  | 6.024898 |
| C  | 9.275338  | 8.376316  | 6.153120 |
| C  | 7.041678  | 7.713292  | 6.284400 |
| C  | 9.243388  | 6.983007  | 6.574953 |
| C  | 7.874375  | 6.576236  | 6.651268 |
| C  | 7.488445  | 10.203499 | 5.657618 |
| H  | 7.394111  | 10.799403 | 6.571362 |
| H  | 8.215261  | 10.682704 | 5.000730 |
| H  | 6.528601  | 10.200443 | 5.140475 |
| C  | 5.545110  | 7.758163  | 6.306736 |
| H  | 5.187062  | 8.140028  | 7.267785 |
| H  | 5.160942  | 8.406513  | 5.516328 |
| H  | 5.117710  | 6.763041  | 6.164924 |
| C  | 7.366085  | 5.230164  | 7.061906 |
| H  | 7.108577  | 5.236088  | 8.125288 |
| H  | 6.469885  | 4.956470  | 6.500046 |
| H  | 8.114513  | 4.452965  | 6.897202 |
| C  | 10.442719 | 6.146328  | 6.891166 |
| H  | 10.759057 | 6.322161  | 7.923680 |
| H  | 10.230543 | 5.081897  | 6.776007 |
| H  | 11.281514 | 6.389742  | 6.235166 |
| C  | 10.495266 | 9.234540  | 6.018434 |
| H  | 10.668028 | 9.799683  | 6.939550 |
| H  | 11.385060 | 8.630971  | 5.827633 |
| H  | 10.386274 | 9.945496  | 5.196366 |
| S  | 13.392888 | 3.535120  | 2.465137 |
| Cl | 7.748529  | 8.562903  | 2.776448 |

**DFT optimized xyz coordinates for C1m Cl up**

|    |           |           |          |
|----|-----------|-----------|----------|
| Au | 0.000000  | 0.000000  | 0.000000 |
| Au | 2.899130  | 0.000000  | 0.000000 |
| Au | 5.798270  | 0.000000  | 0.000000 |
| Au | 1.449570  | 2.510720  | 0.000000 |
| Au | 4.348700  | 2.510720  | 0.000000 |
| Au | 7.247830  | 2.510720  | 0.000000 |
| Au | 2.899130  | 5.021450  | 0.000000 |
| Au | 5.798270  | 5.021450  | 0.000000 |
| Au | 8.697400  | 5.021450  | 0.000000 |
| Au | 4.348700  | 7.532170  | 0.000000 |
| Au | 7.247830  | 7.532170  | 0.000000 |
| Au | 10.146970 | 7.532170  | 0.000000 |
| Au | 5.798270  | 10.042890 | 0.000000 |
| Au | 8.697400  | 10.042890 | 0.000000 |
| Au | 11.596530 | 10.042890 | 0.000000 |
| Au | 7.247830  | 12.553620 | 0.000000 |
| Au | 10.146970 | 12.553620 | 0.000000 |
| Au | 13.046100 | 12.553620 | 0.000000 |
| Au | 8.697400  | 0.000000  | 0.000000 |
| Au | 11.596530 | 0.000000  | 0.000000 |
| Au | 14.495670 | 0.000000  | 0.000000 |
| Au | 10.146970 | 2.510720  | 0.000000 |
| Au | 13.046100 | 2.510720  | 0.000000 |
| Au | 15.945230 | 2.510720  | 0.000000 |
| Au | 11.596530 | 5.021450  | 0.000000 |
| Au | 14.495670 | 5.021450  | 0.000000 |
| Au | 17.394800 | 5.021450  | 0.000000 |
| Au | 13.046100 | 7.532170  | 0.000000 |
| Au | 15.945230 | 7.532170  | 0.000000 |
| Au | 18.844370 | 7.532170  | 0.000000 |
| Au | 14.495670 | 10.042890 | 0.000000 |
| Au | 17.394800 | 10.042890 | 0.000000 |
| Au | 20.293930 | 10.042890 | 0.000000 |
| Au | 15.945230 | 12.553620 | 0.000000 |
| Au | 18.844370 | 12.553620 | 0.000000 |
| N  | 11.106891 | 5.782025  | 3.811725 |
| C  | 12.422269 | 6.007819  | 3.701813 |
| C  | 12.943560 | 7.204219  | 3.243008 |
| C  | 12.073554 | 8.255525  | 2.916042 |
| C  | 10.697248 | 7.997213  | 3.019970 |
| C  | 10.247994 | 6.758690  | 3.441603 |
| N  | 8.609884  | 5.078816  | 3.800150 |

|    |           |          |          |
|----|-----------|----------|----------|
| C  | 7.369962  | 4.579656 | 3.732701 |
| C  | 6.275723  | 5.360756 | 3.399357 |
| C  | 6.477859  | 6.714488 | 3.156029 |
| C  | 7.770866  | 7.220071 | 3.164604 |
| C  | 8.828007  | 6.369409 | 3.467929 |
| H  | 13.074861 | 5.198750 | 4.004161 |
| H  | 14.016472 | 7.329589 | 3.156418 |
| H  | 9.996995  | 8.784185 | 2.769895 |
| H  | 7.262423  | 3.530231 | 3.975109 |
| H  | 5.288248  | 4.917162 | 3.353021 |
| H  | 5.641281  | 7.366439 | 2.930802 |
| H  | 7.950911  | 8.266313 | 2.950206 |
| Ir | 10.213237 | 4.177825 | 4.882094 |
| C  | 10.656477 | 2.805846 | 6.535718 |
| C  | 11.790110 | 2.918619 | 5.670231 |
| C  | 9.538095  | 2.326282 | 5.771684 |
| C  | 11.392165 | 2.436864 | 4.360936 |
| C  | 10.010958 | 2.068128 | 4.424561 |
| C  | 10.640118 | 3.131973 | 7.991881 |
| H  | 10.865552 | 2.220457 | 8.556077 |
| H  | 11.384544 | 3.889710 | 8.237528 |
| H  | 9.667028  | 3.509843 | 8.305795 |
| C  | 8.182999  | 2.022667 | 6.332383 |
| H  | 8.208089  | 1.089755 | 6.903800 |
| H  | 7.847512  | 2.823652 | 6.994596 |
| H  | 7.436900  | 1.903751 | 5.544055 |
| C  | 9.220861  | 1.482327 | 3.298919 |
| H  | 9.686996  | 0.557611 | 2.945398 |
| H  | 8.194934  | 1.249617 | 3.589460 |
| H  | 9.177552  | 2.167257 | 2.447556 |
| C  | 12.289248 | 2.253307 | 3.188578 |
| H  | 12.843197 | 1.311926 | 3.266632 |
| H  | 11.699137 | 2.216172 | 2.273544 |
| H  | 13.015128 | 3.064831 | 3.087784 |
| C  | 13.170898 | 3.319104 | 6.090346 |
| H  | 13.623786 | 2.529086 | 6.697095 |
| H  | 13.819758 | 3.475606 | 5.225737 |
| H  | 13.155606 | 4.237601 | 6.681498 |
| S  | 12.646975 | 9.821427 | 2.389286 |
| Cl | 9.679590  | 5.915734 | 6.476631 |

**DFT optimized xyz coordinates for C2m Cl down**

|    |          |          |          |
|----|----------|----------|----------|
| Au | 0.000000 | 0.000000 | 0.000000 |
| Au | 2.899130 | 0.000000 | 0.000000 |

|    |           |           |          |
|----|-----------|-----------|----------|
| Au | 5.798270  | 0.000000  | 0.000000 |
| Au | 1.449570  | 2.510720  | 0.000000 |
| Au | 4.348700  | 2.510720  | 0.000000 |
| Au | 7.247830  | 2.510720  | 0.000000 |
| Au | 2.899130  | 5.021450  | 0.000000 |
| Au | 5.798270  | 5.021450  | 0.000000 |
| Au | 8.697400  | 5.021450  | 0.000000 |
| Au | 4.348700  | 7.532170  | 0.000000 |
| Au | 7.247830  | 7.532170  | 0.000000 |
| Au | 10.146970 | 7.532170  | 0.000000 |
| Au | 5.798270  | 10.042890 | 0.000000 |
| Au | 8.697400  | 10.042890 | 0.000000 |
| Au | 11.596530 | 10.042890 | 0.000000 |
| Au | 7.247830  | 12.553620 | 0.000000 |
| Au | 10.146970 | 12.553620 | 0.000000 |
| Au | 13.046100 | 12.553620 | 0.000000 |
| Au | 8.697400  | 0.000000  | 0.000000 |
| Au | 11.596530 | 0.000000  | 0.000000 |
| Au | 14.495670 | 0.000000  | 0.000000 |
| Au | 10.146970 | 2.510720  | 0.000000 |
| Au | 13.046100 | 2.510720  | 0.000000 |
| Au | 15.945230 | 2.510720  | 0.000000 |
| Au | 11.596530 | 5.021450  | 0.000000 |
| Au | 14.495670 | 5.021450  | 0.000000 |
| Au | 17.394800 | 5.021450  | 0.000000 |
| Au | 13.046100 | 7.532170  | 0.000000 |
| Au | 15.945230 | 7.532170  | 0.000000 |
| Au | 18.844370 | 7.532170  | 0.000000 |
| Au | 14.495670 | 10.042890 | 0.000000 |
| Au | 17.394800 | 10.042890 | 0.000000 |
| Au | 20.293930 | 10.042890 | 0.000000 |
| Au | 15.945230 | 12.553620 | 0.000000 |
| Au | 18.844370 | 12.553620 | 0.000000 |
| N  | 9.879440  | 6.138434  | 3.561834 |
| C  | 11.084043 | 6.700945  | 3.393562 |
| C  | 12.205520 | 5.968772  | 3.048210 |
| C  | 12.088971 | 4.579716  | 2.857876 |
| C  | 10.817967 | 4.012665  | 3.015620 |
| C  | 9.722590  | 4.807169  | 3.336781 |
| C  | 6.038483  | 5.136097  | 3.487381 |
| C  | 5.602200  | 3.842402  | 3.210711 |
| C  | 6.521590  | 2.799062  | 3.070786 |
| C  | 7.884554  | 3.072221  | 3.127288 |
| C  | 8.319381  | 4.376409  | 3.381134 |
| H  | 11.129807 | 7.776038  | 3.530096 |

|    |           |           |          |
|----|-----------|-----------|----------|
| H  | 13.159747 | 6.463995  | 2.910404 |
| H  | 10.689453 | 2.948769  | 2.850636 |
| H  | 5.310594  | 5.934294  | 3.607126 |
| H  | 4.538911  | 3.639662  | 3.112615 |
| H  | 6.175166  | 1.785103  | 2.895830 |
| H  | 8.596983  | 2.267460  | 2.966967 |
| Ir | 8.229909  | 7.070117  | 4.482644 |
| C  | 8.234567  | 8.834542  | 5.940402 |
| C  | 9.275464  | 7.964767  | 6.298075 |
| C  | 6.978268  | 8.080461  | 5.940974 |
| C  | 8.701417  | 6.635685  | 6.521637 |
| C  | 7.269243  | 6.755460  | 6.401765 |
| C  | 8.333440  | 10.281668 | 5.576100 |
| H  | 7.836511  | 10.895214 | 6.334749 |
| H  | 9.372064  | 10.607602 | 5.498992 |
| H  | 7.851645  | 10.467555 | 4.611824 |
| C  | 5.629932  | 8.680346  | 5.687483 |
| H  | 5.284459  | 9.251298  | 6.556309 |
| H  | 5.667699  | 9.349099  | 4.824135 |
| H  | 4.890246  | 7.906336  | 5.471524 |
| C  | 6.277323  | 5.682556  | 6.719646 |
| H  | 6.055161  | 5.697682  | 7.791660 |
| H  | 5.343989  | 5.827341  | 6.173599 |
| H  | 6.659465  | 4.693970  | 6.457661 |
| C  | 9.454445  | 5.436837  | 7.012112 |
| H  | 9.585929  | 5.472101  | 8.098791 |
| H  | 8.925375  | 4.515311  | 6.759727 |
| H  | 10.444738 | 5.382168  | 6.552593 |
| C  | 10.729819 | 8.292815  | 6.435015 |
| H  | 10.977660 | 8.490524  | 7.483178 |
| H  | 11.357352 | 7.463314  | 6.099289 |
| H  | 11.000427 | 9.174840  | 5.850750 |
| S  | 13.474314 | 3.622566  | 2.364013 |
| Cl | 7.712023  | 8.539599  | 2.628466 |
| C  | 7.400526  | 5.417176  | 3.647138 |

**DFT optimized xyz coordinates for C2m Cl up**

|    |          |          |          |
|----|----------|----------|----------|
| Au | 0.000000 | 0.000000 | 0.000000 |
| Au | 2.899130 | 0.000000 | 0.000000 |
| Au | 5.798270 | 0.000000 | 0.000000 |
| Au | 1.449570 | 2.510720 | 0.000000 |
| Au | 4.348700 | 2.510720 | 0.000000 |
| Au | 7.247830 | 2.510720 | 0.000000 |
| Au | 2.899130 | 5.021450 | 0.000000 |

|    |           |           |          |
|----|-----------|-----------|----------|
| Au | 5.798270  | 5.021450  | 0.000000 |
| Au | 8.697400  | 5.021450  | 0.000000 |
| Au | 4.348700  | 7.532170  | 0.000000 |
| Au | 7.247830  | 7.532170  | 0.000000 |
| Au | 10.146970 | 7.532170  | 0.000000 |
| Au | 5.798270  | 10.042890 | 0.000000 |
| Au | 8.697400  | 10.042890 | 0.000000 |
| Au | 11.596530 | 10.042890 | 0.000000 |
| Au | 7.247830  | 12.553620 | 0.000000 |
| Au | 10.146970 | 12.553620 | 0.000000 |
| Au | 13.046100 | 12.553620 | 0.000000 |
| Au | 8.697400  | 0.000000  | 0.000000 |
| Au | 11.596530 | 0.000000  | 0.000000 |
| Au | 14.495670 | 0.000000  | 0.000000 |
| Au | 10.146970 | 2.510720  | 0.000000 |
| Au | 13.046100 | 2.510720  | 0.000000 |
| Au | 15.945230 | 2.510720  | 0.000000 |
| Au | 11.596530 | 5.021450  | 0.000000 |
| Au | 14.495670 | 5.021450  | 0.000000 |
| Au | 17.394800 | 5.021450  | 0.000000 |
| Au | 13.046100 | 7.532170  | 0.000000 |
| Au | 15.945230 | 7.532170  | 0.000000 |
| Au | 18.844370 | 7.532170  | 0.000000 |
| Au | 14.495670 | 10.042890 | 0.000000 |
| Au | 17.394800 | 10.042890 | 0.000000 |
| Au | 20.293930 | 10.042890 | 0.000000 |
| Au | 15.945230 | 12.553620 | 0.000000 |
| Au | 18.844370 | 12.553620 | 0.000000 |
| N  | 10.004078 | 5.634202  | 3.791068 |
| C  | 11.138225 | 6.334673  | 3.674008 |
| C  | 11.175111 | 7.625685  | 3.177601 |
| C  | 9.965709  | 8.253453  | 2.844466 |
| C  | 8.788107  | 7.517843  | 2.976819 |
| C  | 8.829940  | 6.191158  | 3.398788 |
| C  | 7.044945  | 2.961779  | 3.672069 |
| C  | 5.756740  | 3.287658  | 3.258456 |
| C  | 5.418349  | 4.615361  | 2.981964 |
| C  | 6.402153  | 5.597576  | 3.035968 |
| C  | 7.705565  | 5.254112  | 3.399080 |
| H  | 12.044420 | 5.833995  | 3.993544 |
| H  | 12.119573 | 8.145715  | 3.067880 |
| H  | 7.839763  | 7.981626  | 2.730209 |
| H  | 7.259853  | 1.932838  | 3.941352 |
| H  | 4.997783  | 2.512464  | 3.188736 |
| H  | 4.393132  | 4.880398  | 2.743780 |



|    |           |          |          |
|----|-----------|----------|----------|
| H  | 6.136469  | 6.627356 | 2.814185 |
| Ir | 9.793916  | 3.809236 | 4.835287 |
| C  | 10.876341 | 2.744471 | 6.526407 |
| C  | 11.851591 | 3.171776 | 5.605874 |
| C  | 9.910683  | 1.900596 | 5.842056 |
| C  | 11.515273 | 2.594719 | 4.318022 |
| C  | 10.360696 | 1.754610 | 4.479677 |
| C  | 10.815384 | 3.089736 | 7.978566 |
| H  | 11.111100 | 2.218124 | 8.572847 |
| H  | 11.484220 | 3.917839 | 8.218071 |
| H  | 9.804976  | 3.387500 | 8.265017 |
| C  | 8.787201  | 1.175759 | 6.516635 |
| H  | 9.153309  | 0.290814 | 7.048838 |
| H  | 8.287398  | 1.830974 | 7.233636 |
| H  | 8.034973  | 0.850097 | 5.795084 |
| C  | 9.797907  | 0.849666 | 3.428482 |
| H  | 10.537011 | 0.096444 | 3.133905 |
| H  | 8.908564  | 0.324639 | 3.782387 |
| H  | 9.514890  | 1.410762 | 2.534943 |
| C  | 12.368668 | 2.673609 | 3.102117 |
| H  | 13.281668 | 2.078921 | 3.220418 |
| H  | 11.815924 | 2.280692 | 2.248844 |
| H  | 12.657765 | 3.701218 | 2.861399 |
| C  | 13.046577 | 4.029091 | 5.895321 |
| H  | 13.818477 | 3.458298 | 6.422279 |
| H  | 13.497307 | 4.399910 | 4.970583 |
| H  | 12.781618 | 4.891294 | 6.512614 |
| S  | 9.952044  | 9.917953 | 2.260647 |
| C  | 8.035945  | 3.942842 | 3.812092 |
| Cl | 8.666577  | 5.204214 | 6.476609 |

## Reported densities of Ir piano-stool complexes

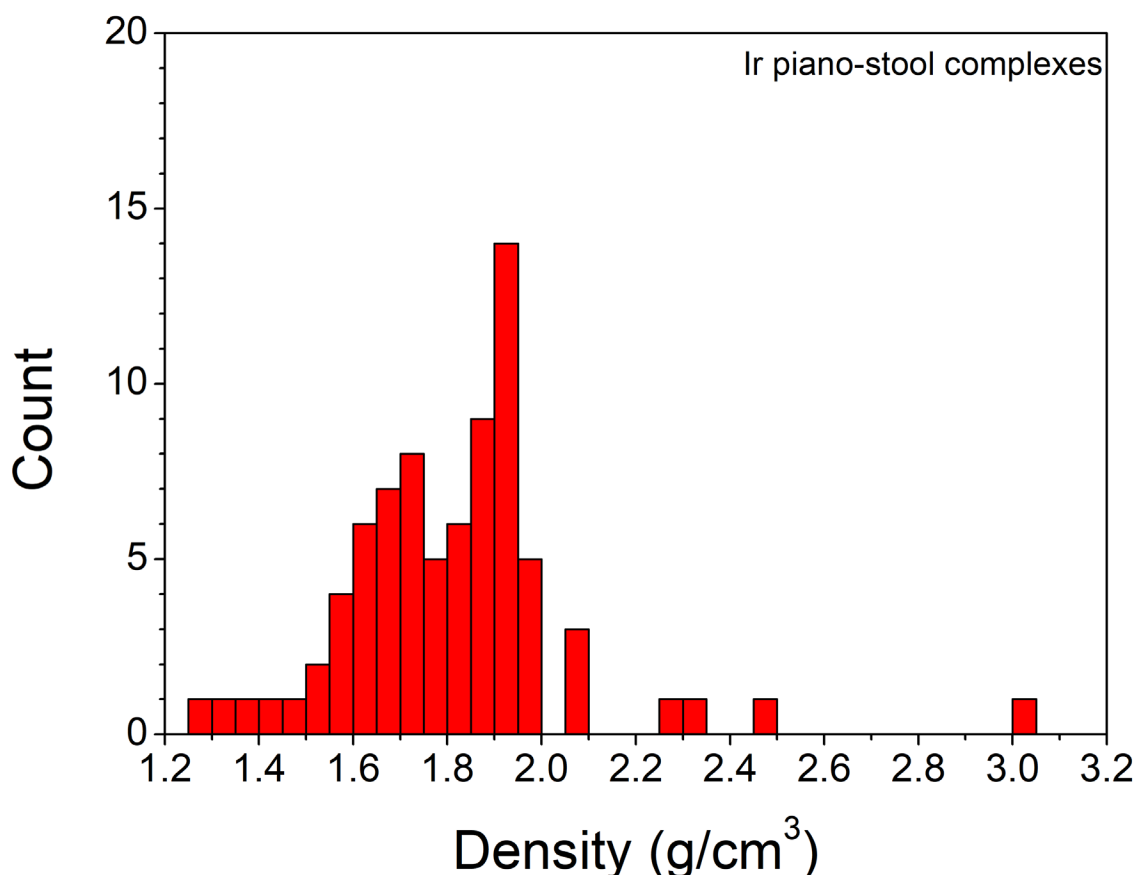

Figure S45. Histogram showing the reported density of Ir piano-stool complexes containing a halide and either a bipyridine or phenylpyridine moiety deposited in the Cambridge Structural Database<sup>33</sup> (78 structures).

## References

1. M. Gliboff, L. Sang, K. M. Knesting, M. C. Schalnath, A. Mudalige, E. L. Ratcliff, H. Li, A. K. Sigdel, A. J. Giordano, J. J. Berry, D. Nordlund, G. T. Seidler, J.-L. Brédas, S. R. Marder, J. E. Pemberton and D. S. Ginger, *Langmuir*, 2013, **29**, 2166-2174.
2. D. L. Allara, A. Baca and C. A. Pryde, *Macromolecules*, 1978, **11**, 1215-1220.
3. D. L. Allara and R. G. Nuzzo, *Langmuir*, 1985, **1**, 52-66.
4. W. N. Hansen, *Journal of the Optical Society of America*, 1968, **58**, 380-390.
5. T. Buffeteau, B. Desbat and J. M. Turlet, *Appl. Spectrosc.*, 1991, **45**, 380-389.
6. J. D. E. McIntyre and D. E. Aspnes, *Surf. Sci.*, 1971, **24**, 417-434.
7. L. Sang, A. Mudalige, A. K. Sigdel, A. J. Giordano, S. R. Marder, J. J. Berry and J. E. Pemberton, *Langmuir*, 2015, **31**, 5603-5613.
8. H. Wang, PhD Thesis, The University of Arizona., 2011.
9. J. Wang, M. L. Clark, Y. Li, C. L. Kaslan, C. P. Kubiak and W. Xiong, *J. Phys. Chem. Lett.*, 2015, **6**, 4204-4209.
10. D. A. Sheik, J. M. Chamberlain, L. Brooks, M. Clark, Y. H. Kim, G. Leriche, C. P. Kubiak, S. Dewhurst and J. Yang, *Langmuir*, 2017, **33**, 2596-2602.
11. C. Baker, I. P. Cockerill, J. E. Kelsey and W. F. Maddams, *Spectrochimica Acta Part A: Molecular Spectroscopy*, 1978, **34**, 673-682.
12. C. Baker, P. S. Johnson and W. F. Maddams, *Spectrochimica Acta Part A: Molecular Spectroscopy*, 1978, **34**, 683-691.

13. P. K. Mallick, G. D. Danzer, D. P. Strommen and J. R. Kincaid, *The Journal of Physical Chemistry*, 1988, **92**, 5628-5634.
14. P. A. Vekariya, P. S. Karia, J. V. Vaghasiya, S. Soni, E. Suresh and M. N. Patel, *Polyhedron*, 2016, **110**, 73-84.
15. P. Štarha, Z. Dvořák and Z. Trávníček, *J. Organomet. Chem.*, 2018, **872**, 114-122.
16. H.-D. Amberger and H. Reddmann, *J. Organomet. Chem.*, 2010, **695**, 2455-2460.
17. É. Bencze, B. V. Lokshin, J. Mink, W. A. Herrmann and F. E. Kühn, *J. Organomet. Chem.*, 2001, **627**, 55-66.
18. K. L. Materna, B. Rudshiteyn, B. J. Brennan, M. H. Kane, A. J. Bloomfield, D. L. Huang, D. Y. Shopov, V. S. Batista, R. H. Crabtree and G. W. Brudvig, *ACS Catal.*, 2016, **6**, 5371-5377.
19. S. Bayari, A. Topaçlı and A. Aydinli, *Spectrosc. Lett.*, 1994, **27**, 1083-1096.
20. J.-D. Chai and M. Head-Gordon, *PCCP*, 2008, **10**, 6615-6620.
21. J. P. Perdew, K. Burke and M. Ernzerhof, *Phys. Rev. Lett.*, 1996, **77**, 3865-3868.
22. S. Grimme, S. Ehrlich and L. Goerigk, *J. Comput. Chem.*, 2011, **32**, 1456-1465.
23. K. P. Kepp, *The Journal of Physical Chemistry A*, 2017, **121**, 2022-2034.
24. W. J. Hehre, R. Ditchfield and J. A. Pople, *J. Chem. Phys.*, 1972, **56**, 2257-2261.
25. P. C. Hariharan and J. A. Pople, *Theor. Chim. Acta*, 1973, **28**, 213-222.
26. M. M. Francl, W. J. Pietro, W. J. Hehre, J. S. Binkley, M. S. Gordon, D. J. DeFrees and J. A. Pople, *J. Chem. Phys.*, 1982, **77**, 3654-3665.
27. P. J. Hay and W. R. Wadt, *J. Chem. Phys.*, 1985, **82**, 299-310.
28. F. Weigend, *PCCP*, 2006, **8**, 1057-1065.
29. F. Petersen, I. Lautenschläger, A. Schlimm, B. M. Flöser, H. Jacob, R. Amirbeigiab, T. R. Rusch, T. Strunskus, O. Magnussen and F. Tuzcek, *Dalton Trans.*, 2021, **50**, 1042-1052.
30. Y. S. Chi, S. Hwang, B. S. Lee, J. Kwak, I. S. Choi and S.-g. Lee, *Langmuir*, 2005, **21**, 4268-4271.
31. G. Valincius, G. Niaura, B. Kazakevičienė, Z. Talaikytė, M. Kažemėkaitė, E. Butkus and V. Razumas, *Langmuir*, 2004, **20**, 6631-6638.
32. O. Reynes, C. Bucher, J.-C. Moutet, G. Royal and E. Saint-Aman, *Inorg. Chim. Acta*, 2008, **361**, 1784-1788.
33. C. R. Groom, I. J. Bruno, M. P. Lightfoot and S. C. Ward, *Acta Crystallographica Section B*, 2016, **72**, 171-179.
